# Supplementary material for: Genomic characterization of Wilms' tumor suppressor 1 targets in nephron progenitor cells during kidney development
Source: Oxford University Press journal article supplement (doi:10.1242/dev.045732), 2010-03-09
Supplement: dev045732tables1.pdf [file dev045732tables1.pdf]

**Table S1. Chromosomal loci amplified in ChIP-PCR for WT1 gene targets**

| Probe chromosomal locus         | Gene                | RefSeq accession number | Fold-enrichment    |
|---------------------------------|---------------------|-------------------------|--------------------|
| chr12:81360406-81360451         | <i>Actn1</i>        | NM_134156               | 1.885162211        |
| chr12:81360886-81360931         | <i>Actn1</i>        | NM_134156               | 2.123701916        |
| chr12:81361062-81361108         | <i>Actn1</i>        | NM_134156               | 2.929542597        |
| chr12:81361329-81361374         | <i>Actn1</i>        | NM_134156               | 3.524859728        |
| <b>chr12:81361473-81361518</b>  | <b><i>Actn1</i></b> | <b>NM_134156</b>        | <b>24.31048345</b> |
| chr12:81361601-81361646         | <i>Actn1</i>        | NM_134156               | 4.263625077        |
| chr12:81361795-81361845         | <i>Actn1</i>        | NM_134156               | 4.348359654        |
| chr12:81361940-81361985         | <i>Actn1</i>        | NM_134156               | 1.767946788        |
| <hr/>                           |                     |                         |                    |
| chr7:91557697-91557757          | <i>Arnt2</i>        | NM_007488               | 3.129574932        |
| chr7:91557860-91557917          | <i>Arnt2</i>        | NM_007488               | 6.569380768        |
| <b>chr7:91557985-91558039</b>   | <b><i>Arnt2</i></b> | <b>NM_007488</b>        | <b>10.89387706</b> |
| <b>chr7:91558101-91558146</b>   | <b><i>Arnt2</i></b> | <b>NM_007488</b>        | <b>10.08329549</b> |
| chr7:91558231-91558276          | <i>Arnt2</i>        | NM_007488               | 7.597717035        |
| <hr/>                           |                     |                         |                    |
| chr14:47007581-47007626         | <i>Bmp4</i>         | NM_007554               | 3.685465809        |
| chr14:47007693-47007740         | <i>Bmp4</i>         | NM_007554               | 5.67119259         |
| chr14:47007907-47007967         | <i>Bmp4</i>         | NM_007554               | 4.403054679        |
| chr14:47008137-47008187         | <i>Bmp4</i>         | NM_007554               | 7.004617637        |
| <b>chr14:47008246-47008291</b>  | <b><i>Bmp4</i></b>  | <b>NM_007554</b>        | <b>8.822840486</b> |
| chr14:47008451-47008501         | <i>Bmp4</i>         | NM_007554               | 5.68974169         |
| chr14:47009773-47009827         | <i>Bmp4</i>         | NM_007554               | 2.787582852        |
| <hr/>                           |                     |                         |                    |
| chr2:172764762-172764807        | <i>Bmp7</i>         | NM_007557               | 3.322869114        |
| chr2:172764969-172765019        | <i>Bmp7</i>         | NM_007557               | 3.406469008        |
| chr2:172765155-172765200        | <i>Bmp7</i>         | NM_007557               | 2.779228295        |
| <b>chr2:172765859-172765904</b> | <b><i>Bmp7</i></b>  | <b>NM_007557</b>        | <b>4.831320846</b> |
| <b>chr2:172765976-172766021</b> | <b><i>Bmp7</i></b>  | <b>NM_007557</b>        | <b>12.87208012</b> |
| chr2:172766162-172766207        | <i>Bmp7</i>         | NM_007557               | 3.583262283        |
| chr2:172766584-172766638        | <i>Bmp7</i>         | NM_007557               | 3.844485195        |
| <hr/>                           |                     |                         |                    |
| chr9:23027189-23027234          | <i>Bmper</i>        | NM_028472               | 2.526008917        |
| chr9:23027603-23027648          | <i>Bmper</i>        | NM_028472               | 2.809731786        |
| <b>chr9:23027727-23027772</b>   | <b><i>Bmper</i></b> | <b>NM_028472</b>        | <b>4.98164993</b>  |
| <b>chr9:23027848-23027893</b>   | <b><i>Bmper</i></b> | <b>NM_028472</b>        | <b>5.139692259</b> |
| <hr/>                           |                     |                         |                    |
| chr14:70474926-70474971         | <i>Egr3</i>         | NM_018781               | 3.888523381        |
| <b>chr14:70475028-70475073</b>  | <b><i>Egr3</i></b>  | <b>NM_018781</b>        | <b>19.40777108</b> |
| <b>chr14:70475219-70475264</b>  | <b><i>Egr3</i></b>  | <b>NM_018781</b>        | <b>24.51984838</b> |
| chr14:70475325-70475370         | <i>Egr3</i>         | NM_018781               | 7.660779059        |
| chr14:70475524-70475569         | <i>Egr3</i>         | NM_018781               | 1.413367113        |
| chr14:70475637-70475682         | <i>Egr3</i>         | NM_018781               | 8.821325541        |
| chr14:70475820-70475880         | <i>Egr3</i>         | NM_018781               | 8.517142461        |
| chr14:70476003-70476048         | <i>Egr3</i>         | NM_018781               | 2.7308202          |
| <hr/>                           |                     |                         |                    |
| chr11:98273670-98273715         | <i>Erbb2</i>        | NM_001003817            | 1.957810511        |
| <b>chr11:98273790-98273835</b>  | <b><i>Erbb2</i></b> | <b>NM_001003817</b>     | <b>10.86298349</b> |
| chr11:98273966-98274011         | <i>Erbb2</i>        | NM_001003817            | 1.889541533        |
| <hr/>                           |                     |                         |                    |
| chr7:137409139-137409185        | <i>Fgfr2</i>        | NM_010207               | 5.53030562         |
| <b>chr7:137409274-137409319</b> | <b><i>Fgfr2</i></b> | <b>NM_010207</b>        | <b>3.280239815</b> |
| <b>chr7:137409376-137409424</b> | <b><i>Fgfr2</i></b> | <b>NM_010207</b>        | <b>5.924066939</b> |
| chr7:137409536-137409581        | <i>Fgfr2</i>        | NM_010207               | 2.87008429         |
| <hr/>                           |                     |                         |                    |
| chr5:34064468-34064513          | <i>Fgfr3</i>        | NM_008010               | 2.484248062        |
| <b>chr5:34064586-34064631</b>   | <b><i>Fgfr3</i></b> | <b>NM_008010</b>        | <b>4.936873665</b> |
| <b>chr5:34064725-34064770</b>   | <b><i>Fgfr3</i></b> | <b>NM_008010</b>        | <b>3.615329019</b> |

|                           |              |           |             |
|---------------------------|--------------|-----------|-------------|
| chr5:34064927-34064972    | <i>Fgfr3</i> | NM_008010 | 2.549270022 |
| chr10:39089847-39089892   | <i>Fyn</i>   | NM_008054 | 1.564046674 |
| chr10:39090282-39090342   | <i>Fyn</i>   | NM_008054 | 18.71706365 |
| chr4:122910233-122910278  | <i>Heyl</i>  | NM_013905 | 3.692497849 |
| chr4:122910601-122910652  | <i>Heyl</i>  | NM_013905 | 3.311598782 |
| chr4:122910756-122910801  | <i>Heyl</i>  | NM_013905 | 4.55858851  |
| chr4:122910859-122910904  | <i>Heyl</i>  | NM_013905 | 2.541881335 |
| chr4:122911146-122911193  | <i>Heyl</i>  | NM_013905 | 25.1419019  |
| chr4:122911325-122911373  | <i>Heyl</i>  | NM_013905 | 13.20722708 |
| chr4:122911495-122911555  | <i>Heyl</i>  | NM_013905 | 2.981349965 |
| chr1:194596332-194596386  | <i>Hhat</i>  | NM_144881 | 2.568933819 |
| chr1:194596508-194596555  | <i>Hhat</i>  | NM_144881 | 4.514940719 |
| chr1:194596616-194596672  | <i>Hhat</i>  | NM_144881 | 5.349621816 |
| chr1:194596819-194596864  | <i>Hhat</i>  | NM_144881 | 4.681517195 |
| chr1:194596974-194597019  | <i>Hhat</i>  | NM_144881 | 11.44601784 |
| chr1:194597148-194597193  | <i>Hhat</i>  | NM_144881 | 5.40315551  |
| chr1:194597336-194597382  | <i>Hhat</i>  | NM_144881 | 3.652075846 |
| chr1:194597502-194597562  | <i>Hhat</i>  | NM_144881 | 3.593429155 |
| chr2:74565721-74565766    | <i>Hoxd4</i> | NM_010469 | 8.614434632 |
| chr2:74565868-74565918    | <i>Hoxd4</i> | NM_010469 | 6.643002341 |
| chr2:74566023-74566070    | <i>Hoxd4</i> | NM_010469 | 16.55598521 |
| chr2:74566185-74566230    | <i>Hoxd4</i> | NM_010469 | 3.883200335 |
| chr2:74566364-74566423    | <i>Hoxd4</i> | NM_010469 | 4.996171293 |
| chr3:130812572-130812629  | <i>Lef1</i>  | NM_010703 | 1.934877536 |
| chr3:130812839-130812897  | <i>Lef1</i>  | NM_010703 | 4.938118888 |
| chr3:130813037-130813083  | <i>Lef1</i>  | NM_010703 | 3.263052169 |
| chr3:130813309-130813354  | <i>Lef1</i>  | NM_010703 | 2.031235399 |
| chr3:130813444-130813489  | <i>Lef1</i>  | NM_010703 | 4.673422167 |
| chr3:130813627-130813682  | <i>Lef1</i>  | NM_010703 | 3.477142506 |
| chr3:130813795-130813855  | <i>Lef1</i>  | NM_010703 | 2.936702235 |
| chr3:130814332-130814377  | <i>Lef1</i>  | NM_010703 | 1.916384879 |
| chr3:130814529-130814579  | <i>Lef1</i>  | NM_010703 | 5.96324733  |
| chr3:130814762-130814813  | <i>Lef1</i>  | NM_010703 | 4.701323172 |
| chr3:130814942-130814987  | <i>Lef1</i>  | NM_010703 | 5.116507061 |
| chr3:130815358-130815403  | <i>Lef1</i>  | NM_010703 | 2.883503056 |
| chr1:52556594-52556640    | <i>Nab1</i>  | NM_008667 | 2.461156585 |
| chr1:52556859-52556904    | <i>Nab1</i>  | NM_008667 | 7.732770253 |
| chr1:52557045-52557090    | <i>Nab1</i>  | NM_008667 | 3.888633984 |
| chr1:52557631-52557676    | <i>Nab1</i>  | NM_008667 | 2.229038673 |
| chr10:127102470-127102530 | <i>Nab2</i>  | NM_008668 | 3.213688433 |
| chr10:127102967-127103012 | <i>Nab2</i>  | NM_008668 | 4.267911483 |
| chr10:127103213-127103263 | <i>Nab2</i>  | NM_008668 | 13.39061571 |
| chr10:127103344-127103389 | <i>Nab2</i>  | NM_008668 | 10.67535378 |
| chr10:127103495-127103540 | <i>Nab2</i>  | NM_008668 | 20.11941172 |
| chr10:127103623-127103668 | <i>Nab2</i>  | NM_008668 | 8.006574663 |
| chr19:44827636-44827681   | <i>Pax2</i>  | NM_011037 | 5.126745443 |
| chr19:44827794-44827848   | <i>Pax2</i>  | NM_011037 | 6.475285785 |
| chr19:44827957-44828002   | <i>Pax2</i>  | NM_011037 | 6.608847117 |
| chr19:44828127-44828181   | <i>Pax2</i>  | NM_011037 | 9.296241051 |
| chr19:44828244-44828304   | <i>Pax2</i>  | NM_011037 | 8.11138572  |

|                          |               |           |             |
|--------------------------|---------------|-----------|-------------|
| chr5:028122004-028122048 | <i>Paxip1</i> | NM_018878 | 6.177889802 |
| chr5:028122197-028122241 | <i>Paxip1</i> | NM_018878 | 1.961888607 |
| chr1:170361694-170361749 | <i>Pbx1</i>   | NM_183355 | 2.176399275 |
| chr1:170362020-170362076 | <i>Pbx1</i>   | NM_183355 | 10.31159147 |
| chr1:170362145-170362190 | <i>Pbx1</i>   | NM_008783 | 3.587618032 |
| chr17:34729644-34729690  | <i>Pbx2</i>   | NM_017463 | 12.8134639  |
| chr17:34729790-34729849  | <i>Pbx2</i>   | NM_017463 | 4.579223142 |
| chr17:34729960-34730009  | <i>Pbx2</i>   | NM_017463 | 4.178332977 |
| chr9:108997355-108997400 | <i>Plxnb1</i> | NM_172775 | 3.005393783 |
| chr9:108998328-108998373 | <i>Plxnb1</i> | NM_172775 | 2.802128647 |
| chr9:108998497-108998542 | <i>Plxnb1</i> | NM_172775 | 4.274904376 |
| chr9:108998726-108998781 | <i>Plxnb1</i> | NM_172775 | 3.042814622 |
| chr9:108998908-108998953 | <i>Plxnb1</i> | NM_172775 | 4.91114745  |
| chr9:108999021-108999066 | <i>Plxnb1</i> | NM_172775 | 4.082159662 |
| chr9:108999169-108999219 | <i>Plxnb1</i> | NM_172775 | 6.033638013 |
| chr9:108999301-108999360 | <i>Plxnb1</i> | NM_172775 | 5.344999505 |
| chr9:108999443-108999491 | <i>Plxnb1</i> | NM_172775 | 9.823247276 |
| chr9:108999602-108999647 | <i>Plxnb1</i> | NM_172775 | 7.401702476 |
| chr9:108999738-108999783 | <i>Plxnb1</i> | NM_172775 | 6.837802597 |
| chr9:108999867-108999919 | <i>Plxnb1</i> | NM_172775 | 9.585251157 |
| chr9:109000074-109000129 | <i>Plxnb1</i> | NM_172775 | 6.355810465 |
| chr9:109000231-109000281 | <i>Plxnb1</i> | NM_172775 | 3.376963132 |
| chr13:63665031-63665091  | <i>Ptch1</i>  | NM_008957 | 6.45134458  |
| chr13:63665293-63665340  | <i>Ptch1</i>  | NM_008957 | 3.630155535 |
| chr13:63665474-63665519  | <i>Ptch1</i>  | NM_008957 | 6.225889244 |
| chr13:63665587-63665632  | <i>Ptch1</i>  | NM_008957 | 1.855085095 |
| chr13:63665972-63666017  | <i>Ptch1</i>  | NM_008957 | 1.843057247 |
| chr13:63666138-63666193  | <i>Ptch1</i>  | NM_008957 | 5.76945033  |
| chr13:63666273-63666320  | <i>Ptch1</i>  | NM_008957 | 7.033637766 |
| chr13:63666384-63666429  | <i>Ptch1</i>  | NM_008957 | 1.520197045 |
| chr5:77694648-77694693   | <i>Rest</i>   | NM_011263 | 6.797812781 |
| chr5:77695015-77695060   | <i>Rest</i>   | NM_011263 | 11.98609536 |
| chr5:77695406-77695451   | <i>Rest</i>   | NM_011263 | 9.463158347 |
| chr5:77695615-77695673   | <i>Rest</i>   | NM_011263 | 4.787859548 |
| chr5:77695739-77695784   | <i>Rest</i>   | NM_011263 | 3.245553161 |
| chr8:91566663-91566708   | <i>Sall1</i>  | NM_021390 | 2.07127703  |
| chr8:91566838-91566883   | <i>Sall1</i>  | NM_021390 | 4.67418891  |
| chr8:91567009-91567059   | <i>Sall1</i>  | NM_021390 | 9.233639151 |
| chr8:91567167-91567212   | <i>Sall1</i>  | NM_021390 | 5.311786495 |
| chr8:91567364-91567411   | <i>Sall1</i>  | NM_021390 | 4.83002815  |
| chr15:76286655-76286702  | <i>Scx</i>    | NM_198885 | 2.203542688 |
| chr15:76287234-76287279  | <i>Scx</i>    | NM_198885 | 3.911941305 |
| chr15:76287601-76287657  | <i>Scx</i>    | NM_198885 | 12.18619789 |
| chr15:76287757-76287805  | <i>Scx</i>    | NM_198885 | 14.66848609 |
| chr15:76288068-76288113  | <i>Scx</i>    | NM_198885 | 1.909122002 |
| chr15:76288981-76289026  | <i>Scx</i>    | NM_198885 | 2.768685593 |
| chr2:124435389-124435449 | <i>Sema6d</i> | NM_172537 | 3.215933752 |
| chr2:124435597-124435642 | <i>Sema6d</i> | NM_172537 | 3.833153329 |
| chr2:124435760-124435806 | <i>Sema6d</i> | NM_172537 | 14.05544767 |
| chr2:124435951-124436003 | <i>Sema6d</i> | NM_172537 | 8.357335762 |
| chr2:124436107-124436152 | <i>Sema6d</i> | NM_172537 | 4.945232261 |

|                           |               |              |             |
|---------------------------|---------------|--------------|-------------|
| chr2:124436300-124436346  | <i>Sema6d</i> | NM_172537    | 1.556800927 |
| chr17:085597097-085597153 | <i>Six2</i>   | NM_011380    | 3.375918459 |
| chr17:085597280-085597324 | <i>Six2</i>   | NM_011380    | 2.567491338 |
| chr12:74213237-74213282   | <i>Six4</i>   | NM_011382    | 4.753794563 |
| chr12:74213466-74213511   | <i>Six4</i>   | NM_011382    | 3.909752225 |
| chr12:74213667-74213712   | <i>Six4</i>   | NM_011382    | 2.013468101 |
| chr11:34934738-34934783   | <i>Slit3</i>  | NM_011412    | 1.864892872 |
| chr11:34935290-34935335   | <i>Slit3</i>  | NM_011412    | 2.828986313 |
| chr11:34935458-34935505   | <i>Slit3</i>  | NM_011412    | 6.671547335 |
| chr11:34935603-34935648   | <i>Slit3</i>  | NM_011412    | 3.467246322 |
| chr11:34935754-34935808   | <i>Slit3</i>  | NM_011412    | 2.971228032 |
| chr11:34935923-34935979   | <i>Slit3</i>  | NM_011412    | 3.136812147 |
| chr9:63605810-63605855    | <i>Smad3</i>  | NM_016769    | 4.682243478 |
| chr9:63605972-63606017    | <i>Smad3</i>  | NM_016769    | 7.111903005 |
| chr9:63606199-63606249    | <i>Smad3</i>  | NM_016769    | 8.248561033 |
| chr9:63606311-63606356    | <i>Smad3</i>  | NM_016769    | 6.160097609 |
| chr9:63606469-63606524    | <i>Smad3</i>  | NM_016769    | 6.875655551 |
| chr18:73863445-73863490   | <i>Smad4</i>  | NM_008540    | 8.673345952 |
| chr18:73863654-73863699   | <i>Smad4</i>  | NM_008540    | 2.795492204 |
| chr9:63870056-63870101    | <i>Smad6</i>  | NM_008542    | 2.111988835 |
| chr9:63870208-63870254    | <i>Smad6</i>  | NM_008542    | 4.353732665 |
| chr9:63870339-63870384    | <i>Smad6</i>  | NM_008542    | 2.362952531 |
| chr18:75527141-75527186   | <i>Smad7</i>  | NM_001042660 | 2.478944837 |
| chr18:75527264-75527309   | <i>Smad7</i>  | NM_001042660 | 10.68378663 |
| chr18:75527381-75527426   | <i>Smad7</i>  | NM_001042660 | 3.016364783 |
| chr18:75528879-75528924   | <i>Smad7</i>  | NM_001042660 | 2.630810343 |
| chr18:75529419-75529479   | <i>Smad7</i>  | NM_001042660 | 2.362047322 |
| chr6:29685666-29685711    | <i>Smo</i>    | NM_176996    | 2.797807879 |
| chr6:29685802-29685847    | <i>Smo</i>    | NM_176996    | 4.020960332 |
| chr6:29685976-29686021    | <i>Smo</i>    | NM_176996    | 3.096481046 |
| chr6:29686120-29686165    | <i>Smo</i>    | NM_176996    | 3.08131583  |
| chr12:28027842-28027887   | <i>Sox11</i>  | NM_009234    | 2.539585452 |
| chr12:28028010-28028055   | <i>Sox11</i>  | NM_009234    | 2.09473395  |
| chr12:28028212-28028257   | <i>Sox11</i>  | NM_009234    | 15.57544715 |
| chr12:28028338-28028383   | <i>Sox11</i>  | NM_009234    | 2.929086121 |
| chr12:28028439-28028499   | <i>Sox11</i>  | NM_009234    | 10.37509824 |
| chr12:28028589-28028642   | <i>Sox11</i>  | NM_009234    | 4.998722019 |
| chr14:106294461-106294506 | <i>Spry2</i>  | NM_011897    | 3.112268827 |
| chr14:106294617-106294677 | <i>Spry2</i>  | NM_011897    | 3.743660349 |
| chr14:106296835-106296880 | <i>Spry2</i>  | NM_011897    | 1.411173652 |
| chr14:106296947-106297000 | <i>Spry2</i>  | NM_011897    | 6.615629183 |
| chr14:106297132-106297186 | <i>Spry2</i>  | NM_011897    | 3.490559634 |
| chr2:166820990-166821050  | <i>Stau1</i>  | NM_011490    | 3.089740778 |
| chr2:166821163-166821213  | <i>Stau1</i>  | NM_011490    | 4.516269924 |
| chr2:166821400-166821445  | <i>Stau1</i>  | NM_011490    | 3.405898012 |
| chr2:165980866-165980921  | <i>Sulf2</i>  | NM_028072    | 5.263198268 |
| chr2:165981030-165981075  | <i>Sulf2</i>  | NM_028072    | 1.892322462 |

|                            |              |              |             |
|----------------------------|--------------|--------------|-------------|
| chr17:46165927-46165972    | <i>Vegfa</i> | NM_001025250 | 4.799762458 |
| chr17:46166092-46166137    | <i>Vegfa</i> | NM_001025250 | 4.441552756 |
| chr17:46166198-46166243    | <i>Vegfa</i> | NM_001025250 | 2.381367448 |
| mm chr17:46167233-46167286 | <i>Vegfa</i> | NM_001025250 | 3.255572239 |
| chr17:46167362-46167407    | <i>Vegfa</i> | NM_001025250 | 3.935303472 |
| chr17:46167511-46167556    | <i>Vegfa</i> | NM_001025250 | 2.392782464 |
| chr17:46167696-46167741    | <i>Vegfa</i> | NM_001025250 | 8.130999176 |
| chr17:46167808-46167853    | <i>Vegfa</i> | NM_001025250 | 7.265683176 |
| chr17:46167969-46168014    | <i>Vegfa</i> | NM_001025250 | 7.108455984 |
| chr17:46168084-46168129    | <i>Vegfa</i> | NM_001025250 | 3.087414303 |
| chr17:46168261-46168306    | <i>Vegfa</i> | NM_001025250 | 3.711736562 |

|                         |            |           |             |
|-------------------------|------------|-----------|-------------|
| chr15:12047157-12047214 | <i>Zfr</i> | NM_011767 | 8.028833219 |
| chr15:12047388-12047433 | <i>Zfr</i> | NM_011767 | 12.01663356 |
| chr15:12047514-12047559 | <i>Zfr</i> | NM_011767 | 6.05037632  |
| chr15:12047663-12047717 | <i>Zfr</i> | NM_011767 | 10.6784367  |
| chr15:12047808-12047853 | <i>Zfr</i> | NM_011767 | 2.182854239 |

|                        |            |           |             |
|------------------------|------------|-----------|-------------|
| chr6:42299668-42299713 | <i>Zyx</i> | NM_011777 | 2.497418422 |
| chr6:42299887-42299932 | <i>Zyx</i> | NM_011777 | 5.103425692 |
| chr6:42300024-42300069 | <i>Zyx</i> | NM_011777 | 2.888080344 |
| chr6:42300192-42300237 | <i>Zyx</i> | NM_011777 | 11.54813576 |
| chr6:42300447-42300492 | <i>Zyx</i> | NM_011777 | 2.382498451 |
| chr6:42300594-42300639 | <i>Zyx</i> | NM_011777 | 2.010529457 |
| chr6:42300727-42300772 | <i>Zyx</i> | NM_011777 | 3.411675383 |

For ChIP-PCR validation of selected WT1 target genes identified by ChIP-chip, primers were designed to amplify a 150-300 bp region around the genomic location of probes that showed peak levels of immunoenrichment by WT1 ChIP-chip (highlighted in red).
