# Supplementary material for: Genomic characterization of Wilms' tumor suppressor 1 targets in nephron progenitor cells during kidney development
Source: Oxford University Press journal article supplement (doi:10.1242/dev.045732), 2010-03-09
Supplement: dev045732tables2.pdf [file dev045732tables2.pdf]

**Table S2. Primer sequences for ChIP-PCR**

| Primer name | Primer sequence       | Amplicon size | Number of cycles | Annealing temperature | Q solution added |
|-------------|-----------------------|---------------|------------------|-----------------------|------------------|
| ACTN1-FRWD  | CTCTCATTGGGAATTCCTGG  | 135 bp        | 31               | 51°C                  | no               |
| ACTN1-REV   | AGGTGGTGTACATGAGCTG   |               |                  |                       |                  |
| ARNT2-FRWD  | CCTTCAGCGACATCAGACAA  | 216 bp        | 31               | 51°C                  | no               |
| ARNT2-REV   | CGCTGAGCGAGAGAAAAGTT  |               |                  |                       |                  |
| BMP4-FRWD   | TTGACCAGCTACAGAATCG   | 126 bp        | 30               | 53°C                  | yes              |
| BMP4-REV    | CGCTCCGAGGTTAGAACAG   |               |                  |                       |                  |
| BMP7-FRWD   | TACAAGTCCGGAGAGCGAGT  | 120 bp        | 31               | 55°C                  | yes              |
| BMP7-REV    | AGATCGGAAAGGGGTTTGT   |               |                  |                       |                  |
| BMPER-FRWD  | CTAGTACGCCCTCGGTCC    | 227 bp        | 30               | 53°C                  | no               |
| BMPER-REV   | AGTTGCTCTCAGCGGGTTAG  |               |                  |                       |                  |
| EGR3-FRWD   | AGAGCTAGAGGAGATCCGGG  | 230 bp        | 28               | 55°C                  | yes              |
| EGR3-REV    | GAACTTGCATCTCTCAGGGG  |               |                  |                       |                  |
| ERBB2-FRWD  | AGAAAAGTGAAGCTGGGAGCA | 165 bp        | 34               | 55°C                  | no               |
| ERBB2-REV   | GGCAATCTCAGCTCCACAA   |               |                  |                       |                  |
| FGFR2-FRWD  | GCATTCATCCACTCCTCCAT  | 261 bp        | 30               | 55°C                  | no               |
| FGFR2-REV   | TTTGGAGTTTTCTCCGAGA   |               |                  |                       |                  |
| FGFR3-FRWD  | ACTGGGACAGAGGAGACCCT  | 174 bp        | 31               | 55°C                  | yes              |
| FGFR3-REV   | CTTACGAACCGTCCACTTC   |               |                  |                       |                  |
| FYN-FRWD    | AAATAGGAATTGGCTTGGGG  | 249 bp        | 31               | 55°C                  | yes              |
| FYN-REV     | GGGAGGTTCCAGAAATAGGC  |               |                  |                       |                  |
| HEYL-FRWD   | GTAAGACAGGGTGGAGCGAG  | 219 bp        | 30               | 53°C                  | yes              |
| HEYL-REV    | CCTCCAGCTGAACTGTCCTC  |               |                  |                       |                  |
| HHAT-FRWD   | ACACACACACACACCACG    | 280 bp        | 31               | 57°C                  | yes              |
| HHAT-REV    | AAAGGCTGCCACGACTTAAC  |               |                  |                       |                  |
| HOXD4-FRWD  | GAGGACTCCATTTCCACAGC  | 106 bp        | 29               | 53°C                  | yes              |
| HOXD4-REV   | AAAGGTTCTCCCTTGCCACT  |               |                  |                       |                  |
| LEF1-FRWD   | TCAGTCATCCCGAAGAGGAG  | 295 bp        | 27               | 55°C                  | no               |
| LEF1-REV    | GCCACCCTTAGCCATAGAA   |               |                  |                       |                  |
| NAB1-FRWD   | GCCAAGTTTCTGAAAGCCAC  | 103 bp        | 28               | 51°C                  | no               |
| NAB1-REV    | GCTGAGTCTCCGCTTTCTTC  |               |                  |                       |                  |
| NAB2-FRWD   | CACCTCCTTTGCCACTAA    | 237 bp        | 30               | 51°C                  | no               |
| NAB2-REV    | CCGAGAGAGAAGACGTGGAG  |               |                  |                       |                  |
| PAX2-FRWD   | TCCCGAGATGGGTATCAGAG  | 181 bp        | 27               | 55°C                  | no               |
| PAX2-REV    | TTGGTTGCTTTCCCTCATC   |               |                  |                       |                  |
| PAXIP-FRWD  | CCACCGCTAGTACTTGACC   | 141 bp        | 30               | 53°C                  | yes              |
| PAXIP-REV   | GGCAGTAGGCAGAGCTACGA  |               |                  |                       |                  |
| PBX1-FRWD   | GCAGGTGAGGAGCACGTTAT  | 248 bp        | 27               | 53°C                  | no               |
| PBX1-REV    | CGGCTGGTTAAGCCAATAGA  |               |                  |                       |                  |
| PBX2-FRWD   | CAAGACATCGGGGACATTCT  | 260 bp        | 32               | 55°C                  | yes              |
| PBX2-REV    | AGGAGGGAGTGAGACCACCT  |               |                  |                       |                  |
| PLXNB1-FRWD | CAGAAGAAAATGGTCTCGGG  | 134 bp        | 29               | 55°C                  | no               |

|             |                      |        |    |      |     |
|-------------|----------------------|--------|----|------|-----|
| PLXNB1-REV  | CAGCTACCAGGCCTGACCTA |        |    |      |     |
| PTCH1-FRWD  | CCGAAGATTTAAGGTGGCAA | 193 bp | 30 | 55°C | no  |
| PTCH1-REV   | GGAGGGAGCCAAAGTAAAGG |        |    |      |     |
| REST-FRWD   | TTTGAGATACTGTGGCTCG  | 212 bp | 36 | 51°C | no  |
| REST-REV    | GGGAAGTTTCAGGACCG    |        |    |      |     |
| SALL1-FRWD  | CCCATTCGTGAGTGTTCT   | 239 bp | 35 | 53°C | yes |
| SALL1-REV   | CCTTCCTGGGTCCTCTCT   |        |    |      |     |
| SCX-FRWD    | GCCAGGAGAGAAAGCCTCT  | 257 bp | 27 | 55°C | no  |
| SCX-REV     | CCGAGCAGTGCCTTTATAGC |        |    |      |     |
| SEMA6D-FRWD | GGAGATCTAGGGGAGCGACT | 270 bp | 30 | 55°C | no  |
| SEMA6D-REV  | TGGGCGACTGTCTTACCTCT |        |    |      |     |
| SIX2-FRWD   | GAAAAGAGGGGGACAGAAGG | 298 bp | 30 | 55°C | no  |
| SIX2-REV    | AGGGGATAGACATCTCGGGT |        |    |      |     |
| SIX4-FRWD   | AGGAGGAAAAGAAAGCTGGG | 260 bp | 27 | 55°C | no  |
| SIX4-REV    | GCGAGGAGACGGTGTATTGT |        |    |      |     |
| SLIT3-FRWD  | ACACGCTCAATAAGTTGGGG | 229 bp | 30 | 55°C | no  |
| SLIT3-REV   | TAATGGACCCCTCATACCCA |        |    |      |     |
| SMAD3-FRWD  | CCAAGTCTACGTTTCACGCA | 285 bp | 25 | 55°C | no  |
| SMAD3-REV   | AGTGCCTGTCCCTGTGAGT  |        |    |      |     |
| SMAD4-FRWD  | ACCACATCCGGGTAATTTCA | 112 bp | 35 | 53°C | yes |
| SMAD4-REV   | ACTGGGACCCTCCCTGCT   |        |    |      |     |
| SMAD6-FRWD  | CTTTGCCTCTCTGGCTTG   | 101 bp | 27 | 55°C | no  |
| SMAD6-REV   | ACGCCATTTTATTAGCCC   |        |    |      |     |
| SMAD7-FRWD  | AGAGTCTCCGAGGAAGAGGC | 144 bp | 29 | 53°C | yes |
| SMAD7-REV   | CACAGGCTAGTGTGGGGG   |        |    |      |     |
| SMO-FRWD    | AGACAGCTTCGATCTCCAGG | 188 bp | 33 | 53°C | no  |
| SMO-REV     | CGGAGGCTACTTAGGCGAC  |        |    |      |     |
| SOX11-FRWD  | CACCTTCTGGGTCATTTGCT | 251 BP | 30 | 51°C | no  |
| SOX11-REV   | TGAGCAGCCACGTTAAACAG |        |    |      |     |
| SPRY2-FRWD  | AGCGAGTCGCAGCTTTTAG  | 186 bp | 30 | 51°C | no  |
| SPRY2-REV   | ATAGCCCTCCACCTCACTT  |        |    |      |     |
| STAU1-FRWD  | TGGGTCTGGCACACTGATAA | 175 bp | 27 | 53°C | no  |
| STAU1-REV   | CCCTTCGTCACTCACTTCGT |        |    |      |     |
| SULF2-FRWD  | CTTTTCGTCCTCCTCCCTC  | 129 bp | 30 | 55°C | no  |
| SULF2-REV   | CCCTGTGAAAGCGGATAAAA |        |    |      |     |
| VEGFA-FRWD  | AACGGCAGTGACAGCAAAG  | 267 bp | 32 | 55°C | no  |
| VEGFA-REV   | AGTCACCGCACGTACGATCT |        |    |      |     |
| ZFR-FRWD    | CAACATGACCCTGAAAGGCT | 261 bp | 31 | 50°C | no  |
| ZFR-REV     | CTTTGGAAAGGGGAGGAGAC |        |    |      |     |
| ZYX-FRWD    | CGCTTAGACCGAGGAGTGTC | 195 bp | 31 | 55°C | yes |
| ZYX-REV     | GGAAAGGATTCACCTTGGGC |        |    |      |     |

Primer sequences used in ChIP-PCR experiments together with PCR reaction conditions. Each PCR was optimized for amplification within the linear range. Supplementation with Q solution (Qiagen) in the PCR reaction mixture is noted when used.
