# Supplementary material for: Genomic characterization of Wilms' tumor suppressor 1 targets in nephron progenitor cells during kidney development
Source: Oxford University Press journal article supplement (doi:10.1242/dev.045732), 2010-03-09
Supplement: dev045732tables3.pdf [file dev045732tables3.pdf]

**Table S3. Primer sequences for RNA probes**

| Probe name              | Primer sequence           | Amplicon size |
|-------------------------|---------------------------|---------------|
| CXXC5 exon 3 probe FRWD | 5'TGGACAAAAGCAACCCCTACC3' | 591 bp        |
| CXXC5 exon 3 probe REV  | 5'ATCACTGAAACCACCGGAAG3'  |               |
| LSP1 5'UTR FRWD         | 5'GGCAGAGGAGAACAGAGGTG3'  | 454 bp        |
| LSP1 5'UTR REV          | 5'TCGCTTTGAGAGGGTTCAGT3'  |               |
| HEYL exon 5 FRWD        | 5'TCCACCTCAAGAGCTATGC3'   | 531 bp        |
| HEYL exon 5 REV         | 5'TCAGAAAAGCCCCAATTCAG3'  |               |
| PBX2 exon 9 FRWD        | 5'GGTGGAATCACTCCGACACT3'  | 500 bp        |
| PBX2 exon 9 REV         | 5'TATAAGTGGGGTGGGGAACA3'  |               |
| PLXDC2 5'UTR FRWD       | 5'CCCACCTCTCTTCTGCTCAC3'  | 886 bp        |
| PLXDC2 5'UTR REV        | 5'CTGCCTTAAAAGGGTCCACA3'  |               |
| RPS6KA3 exon 14-19 FRWD | 5'TGAGTCTGAAGCCCAGAGT3'   | 744 bp        |
| RPS6KA3 exon 14-19 REV  | 5'CTCTGTGAACCACCCCTTGT3'  |               |
| SCX exon1-2 FRWD        | 5'GACCCGCTTTCTTCCACAG3'   | 431 bp        |
| SCX exon1-2 REV         | 5'AGGTAGAGAGCCAGCATGGA3'  |               |
| SOX11 3'UTR FRWD        | 5'GAGCCTGTACGACGAAGTGC3'  | 841 bp        |
| SOX11 3'UTR REV         | 5'TCAAAGAGCCACAAGCTTCA3'  |               |

Primer sequences used to generate RNA probes for in situ hybridization.
