# Supplementary material for: Genomic characterization of Wilms' tumor suppressor 1 targets in nephron progenitor cells during kidney development
Source: Oxford University Press journal article supplement (doi:10.1242/dev.045732), 2010-03-09
Supplement: dev045732tables4.pdf [file dev045732tables4.pdf]

**Supplemental Table 4. Summary Statistics of WT1 ChIP-chip Peaks and Motif Discovery.**

| Gene          | Rank | Fold-Enrichment | Chromosome | Start     | End       | Distance to TSS | P-Value | Location of WT1 Matrix/Consensus Site                                                             | WT1 Consensus Site Present |
|---------------|------|-----------------|------------|-----------|-----------|-----------------|---------|---------------------------------------------------------------------------------------------------|----------------------------|
| 5830427D03Rik | 1    | 36.62           | chr15      | 98592408  | 98593528  | -577            | < 0.001 | 98593647; 98592930; 98593212; 98593644; 98593643                                                  | yes                        |
| Myo1b         | 2    | 27.21           | chr1       | 51972665  | 51972038  | 108             | < 0.001 | 51973701; 51973701                                                                                | yes                        |
| Bcat2         | 3    | 26.35           | chr7       | 52823332  | 52824317  | -2074           | < 0.001 | 52823919; 52824027                                                                                | yes                        |
| Hey1          | 4    | 25.11           | chr4       | 122910233 | 122911555 | 372             | < 0.001 | 122911152                                                                                         | yes                        |
| Lsp1          | 5    | 24.46           | chr7       | 149656912 | 149657945 | -193            | < 0.001 | 149657266; 149657864                                                                              | no                         |
| Egr3          | 6    | 24.39           | chr14      | 70474926  | 70476048  | -2009           | < 0.001 | 70475097; 70475640; 70475464; 70475222; 70475464                                                  | yes                        |
| Actn1         | 7    | 23.89           | chr12      | 81360886  | 81361985  | -193            | < 0.001 | 81362068; 81362068; 81361341; 81362255; 81361544; 81361543                                        | yes                        |
| Pik3r3        | 8    | 22.67           | chr4       | 115893800 | 115894714 | -430            | < 0.001 | 115894389; 115894389                                                                              | yes                        |
| Cxhc5         | 9    | 20.95           | chr18      | 35989256  | 35990465  | 751             | < 0.001 | 35990579; 35989513; 35989513; 35990468; 35990107; 35990106                                        | yes                        |
| Hoxb4         | 10   | 20.76           | chr11      | 96180066  | 96181209  | 470             | < 0.001 | 96180512; 96180515                                                                                | yes                        |
| Mrc2          | 11   | 20.46           | chr11      | 105153418 | 105154743 | -257            | < 0.001 | 105154027; 105154710; 105154049; 105154049                                                        | yes                        |
| 4933433P14Rik | 12   | 20.38           | chr12      | 106923623 | 106923883 | 85              | < 0.001 | N/A                                                                                               | no                         |
| Senp8         | 13   | 19.7            | chr9       | 59598324  | 59599247  | -473            | < 0.001 | 59598660; 59598660; 59598883; 59598837; 59598837                                                  | yes                        |
| Nab2          | 14   | 19.58           | chr10      | 127103344 | 127103263 | 241             | < 0.001 | 127104787; 127105095; 127106973; 127104790                                                        | yes                        |
| Fyn           | 15   | 18.7            | chr10      | 39089847  | 39090342  | 708             | < 0.001 | 39090432; 39090251                                                                                | yes                        |
| BC068171      | 16   | 18.31           | chrX       | 72341212  | 72341415  | -20             | < 0.001 | N/A                                                                                               | no                         |
| Igf2bp2       | 17   | 17.7            | chr16      | 22162849  | 22163052  | 342             | < 0.001 | 22161983; 22162833; 22162772                                                                      | no                         |
| Fosl2         | 18   | 17.63           | chr5       | 32437957  | 32439313  | -695            | < 0.001 | 32438608; 32438486; 32438611; 32438605; 32438304; 32438965; 32438307                              | yes                        |
| Bhlhb2        | 19   | 17.53           | chr6       | 108609800 | 108610667 | -550            | < 0.001 | 108610225; 108610225                                                                              | yes                        |
| Bri3          | 20   | 17.49           | chr5       | 145016519 | 145017300 | 620             | < 0.001 | 145016552                                                                                         | yes                        |
| Bnip3         | 21   | 16.97           | chr7       | 146100844 | 146101883 | -315            | < 0.001 | 146101475; 146101211; 146101210                                                                   | yes                        |
| Fbxl19        | 22   | 16.67           | chr7       | 134889599 | 134891192 | 350             | < 0.001 | 134890215                                                                                         | yes                        |
| Hoxd4         | 23   | 16.56           | chr2       | 74565721  | 74566423  | 6012            | < 0.001 | 74565827                                                                                          | yes                        |
| Colla2        | 24   | 16.52           | chr6       | 4454897   | 4456114   | -200            | < 0.001 | 4455761                                                                                           | yes                        |
| Wnk4          | 25   | 16.21           | chr11      | 101120919 | 101122031 | -436            | < 0.001 | 101120978; 101121644; 101120674; 101120976; 101121355; 101121524; 101121842; 101120975; 101121587 | no                         |
| Usp52         | 26   | 15.79           | chr10      | 127740614 | 127740859 | 116             | < 0.001 | 127740414                                                                                         | no                         |
| Inoc1         | 27   | 15.77           | chr2       | 119303230 | 119303805 | -77             | < 0.001 | 119303668; 119303671                                                                              | yes                        |
| Sept11        | 28   | 15.71           | chr5       | 93522393  | 93523191  | 418             | < 0.001 | N/A                                                                                               | yes                        |
| Mink1         | 29   | 15.61           | chr11      | 70376350  | 70377567  | 440             | < 0.001 | N/A                                                                                               | no                         |
| Sox11         | 30   | 15.48           | chr12      | 28027842  | 28028642  | -657            | < 0.001 | 28028275                                                                                          | no                         |
| Sp4           | 31   | 15.45           | chr12      | 119539184 | 119541019 | 112             | < 0.001 | 119539611; 119540679; 119540773; 119540645; 119540665                                             | no                         |
| Shf           | 32   | 15.19           | chr2       | 122194023 | 122194739 | 90              | < 0.001 | 122194677; 122194884; 122194677; 122194887                                                        | yes                        |
| Scx           | 33   | 14.68           | chr15      | 76287234  | 76288113  | -86             | < 0.001 | 76288613; 76288613; 76287512; 76287515                                                            | yes                        |
| Ahdcl         | 34   | 14.51           | chr4       | 132568703 | 132569015 | 1461            | < 0.001 | 132568981; 132568981                                                                              | yes                        |
| Ube2h         | 35   | 14.38           | chr6       | 30253511  | 30254074  | 293             | < 0.001 | 30253511                                                                                          | no                         |
| Sox12         | 36   | 14.37           | chr2       | 152222057 | 152222715 | 1272            | < 0.001 | 152222524; 152222497                                                                              | yes                        |
| Usp14         | 37   | 14.26           | chr18      | 10029315  | 10030485  | 81              | < 0.001 | 10030089; 10029954                                                                                | yes                        |

First tier peaks of all 1663 WT1 target genes identified by ChIP-chip. Genes are ranked by fold-enrichment scores on array, and locations of defined peak regions are noted. Negative values indicate locations upstream (5') of the TSS. The motif discovery algorithm THEME identified a WT1 matrix site (tGCGtgGGcGg) in 1432 of the 1663 (86%) WT1 bound genes, consisting of multiple permutations of a core WT1 consensus site G<sup>1</sup>C<sup>2</sup>G<sup>3</sup>(T/G)<sup>4</sup>(G/A)<sup>5</sup>G<sup>6</sup>G<sup>7</sup>(C/A)<sup>8</sup>G<sup>9</sup>(G/T)<sup>10</sup>. The WT1 consensus site was mapped to defined peak regions, with defined nucleotide substitutions permitted at the 4th, 5th, 8th or 10th positions (substitutions noted in parentheses). The WT1 consensus site is present in 806 of 1663 bound genes, and occurs with higher frequency in target genes enriched >8-fold (74% vs. 25% in genes enriched < 8-fold; *P* < 0.0001 by Fisher's Exact Test). Where present, WT1 matrix and consensus site locations are noted. For WT1 matrix sites with low information content that lack an exact location assignment by THEME, the start site of the WT1 bound region is noted. (TSS) transcriptional start site. (N/A) not applicable (No WT1 site present).

**Supplemental Table 4. Summary Statistics of WT1 ChIP-chip Peaks and Motif Discovery.**

| Gene          | Rank | Fold-Enrichment | Chromosome | Start     | End       | Distance to TSS | P-Value | Location of WT1 Matrix/Consensus Site                                       | WT1 Consensus Site Present |
|---------------|------|-----------------|------------|-----------|-----------|-----------------|---------|-----------------------------------------------------------------------------|----------------------------|
| Sema6d        | 38   | 14.11           | chr2       | 124435389 | 124436346 | -248            | < 0.001 | 124436315; 124436315; 124436315                                             | yes                        |
| Stac2         | 39   | 14.06           | chr11      | 97913236  | 97915103  | 160             | < 0.001 | 97915000; 97914120                                                          | yes                        |
| Cnot6l        | 40   | 13.88           | chr5       | 96590372  | 96591557  | -522            | < 0.001 | 96590916                                                                    | yes                        |
| Jmjd1a        | 41   | 13.77           | chr6       | 71582467  | 71583694  | -579            | < 0.001 | 71583591; 71582884; 71583611                                                | yes                        |
| Zfp467        | 42   | 13.72           | chr6       | 48394253  | 48395520  | 331             | < 0.001 | 48396035                                                                    | yes                        |
| Brd2          | 43   | 13.32           | chr17      | 34256834  | 34258910  | -818            | < 0.001 | 34257458; 34258484                                                          | yes                        |
| Bahd1         | 44   | 13.31           | chr2       | 118726325 | 118728298 | -160            | < 0.001 | 118727825; 118727828                                                        | yes                        |
| Ptbp1         | 45   | 13.19           | chr10      | 79316946  | 79317577  | 43              | < 0.001 | 79317619                                                                    | yes                        |
| Dpy19l3       | 46   | 13.14           | chr7       | 36538396  | 36539526  | 239             | < 0.001 | 36539287; 36539397; 36539397                                                | yes                        |
| Acp6          | 47   | 13.11           | chr3       | 96962277  | 96963022  | -77             | < 0.001 | 96962533; 96962535; 96962537; 96962542                                      | no                         |
| Wsb2          | 48   | 13.04           | chr5       | 117806468 | 117807570 | -333            | < 0.001 | 117807396; 117807370; 117807376; 117807343                                  | no                         |
| Bmp7          | 49   | 12.87           | chr2       | 172765859 | 172766638 | -204            | < 0.001 | 172766291; 172766291                                                        | yes                        |
| Appbp2        | 50   | 12.79           | chr11      | 85047380  | 85048397  | 443             | < 0.001 | 85048523; 85048522                                                          | yes                        |
| Arhgap18      | 50   | 12.79           | chr10      | 26492774  | 26493171  | 483             | < 0.001 | 26492693; 26492707; 26492699                                                | no                         |
| Gprk6         | 51   | 12.78           | chr13      | 55545945  | 55546477  | -558            | < 0.001 | 55546261; 55546261                                                          | yes                        |
| Pbx2          | 51   | 12.78           | chr17      | 34729336  | 34730271  | 252             | < 0.001 | 34730406; 34731021; 34730103; 34730157; 34731018; 34730165                  | no                         |
| Pum1          | 52   | 12.76           | chr4       | 130219949 | 130220420 | 849             | < 0.001 | 130219924                                                                   | no                         |
| Gsr           | 53   | 12.71           | chr8       | 34764109  | 34764626  | 895             | < 0.001 | 34764236; 34764661                                                          | yes                        |
| Des           | 54   | 12.58           | chr1       | 75356252  | 75356917  | -24             | < 0.001 | 75356961                                                                    | yes                        |
| Inpp1         | 55   | 12.56           | chr7       | 108985748 | 108986865 | -237            | < 0.001 | 108986829                                                                   | yes                        |
| Lin7b         | 56   | 12.54           | chr7       | 52625127  | 52625872  | 270             | < 0.001 | 52625959; 52625959                                                          | yes                        |
| 5730403B10Rik | 57   | 12.53           | chr16      | 4789289   | 4790148   | 308             | < 0.001 | 4790129                                                                     | yes                        |
| Prkaca        | 58   | 12.45           | chr8       | 86496400  | 86497549  | 16              | < 0.001 | 86497063; 86497098; 86497190; 86497189                                      | yes                        |
| Cmtm3         | 59   | 12.42           | chr8       | 106864070 | 106864572 | -233            | < 0.001 | 106864105                                                                   | yes                        |
| Rest          | 60   | 12.04           | chr5       | 77694648  | 77695784  | -1927           | < 0.001 | 77695132; 77695493                                                          | yes                        |
| PPP3ca        | 61   | 12.03           | chr3       | 136332931 | 136335004 | 577             | < 0.001 | 136334688; 136333234; 136334124; 136333263; 136333263; 136333799; 136333799 | yes                        |
| Rsbnl         | 62   | 12.02           | chr3       | 103718356 | 103718928 | 548             | < 0.001 | 103718866; 103719000; 103718999                                             | yes                        |
| Baiap2        | 63   | 12.01           | chr11      | 119803386 | 119804456 | -595            | < 0.001 | 119804520; 119804253; 119804483; 119803798; 119804329                       | yes                        |
| DbnDD2        | 64   | 11.99           | chr2       | 164311170 | 164312528 | -4              | < 0.001 | 164311983; 164312479; 164312326; 164312458; 164312457                       | yes                        |
| Tesk1         | 65   | 11.98           | chr4       | 43455694  | 43456310  | 1048            | < 0.001 | 43456346                                                                    | yes                        |
| Zfr           | 66   | 11.96           | chr15      | 12047157  | 12047853  | -195            | < 0.001 | 12047523                                                                    | yes                        |
| Hsp90ab1      | 67   | 11.94           | chr17      | 45709579  | 45711348  | -996            | < 0.001 | 45709822; 45709825                                                          | yes                        |
| Rps6ka3       | 68   | 11.9            | chrX       | 155692701 | 155693348 | -955            | < 0.001 | 155693772; 155692856; 155693292; 155693129                                  | yes                        |
| Kif23         | 69   | 11.89           | chr9       | 61793888  | 61794454  | 242             | < 0.001 | 61793888                                                                    | no                         |
| Ets2          | 70   | 11.82           | chr16      | 95923399  | 95924410  | -8              | < 0.001 | 95924137; 95924137; 95924164; 95924163                                      | yes                        |
| Tgif2         | 71   | 11.8            | chr2       | 156666586 | 156667634 | 1383            | < 0.001 | 156666842                                                                   | yes                        |
| Phf10         | 72   | 11.77           | chr17      | 15098705  | 15098858  | -599            | < 0.001 | 15098831; 15098830                                                          | yes                        |
| Cacnb1        | 73   | 11.7            | chr11      | 97882896  | 97883825  | 232             | < 0.001 | 97883162; 97883162; 97883613                                                | yes                        |
| Rcor3         | 74   | 11.66           | chr1       | 193961353 | 193960970 | 601             | < 0.001 | 193962221; 193962221                                                        | yes                        |
| 5830457O10Rik | 75   | 11.55           | chr8       | 109416395 | 109417174 | 615             | < 0.001 | N/A                                                                         | no                         |
| Hhat          | 76   | 11.41           | chr1       | 194596974 | 194596864 | 219             | < 0.001 | 194597040; 194597053; 194597440; 194597095; 194596777; 194597089            | no                         |
| Sh3md4        | 77   | 11.39           | chr10      | 58275327  | 58275609  | -356            | < 0.001 | 58275643; 58276268; 58275949; 58275949                                      | yes                        |
| Zyx           | 78   | 11.38           | chr6       | 42299668  | 42300772  | 388             | < 0.001 | 42300012                                                                    | yes                        |
| Ascl1         | 79   | 11.33           | chr10      | 86955966  | 86955851  | 417             | < 0.001 | 86956209                                                                    | yes                        |
| Vdac1         | 80   | 11.31           | chr11      | 52174874  | 52175056  | 418             | < 0.001 | N/A                                                                         | no                         |
| 1110003E01Rik | 81   | 11.3            | chr5       | 65884068  | 65885002  | -326            | < 0.001 | 65885161                                                                    | yes                        |
| Zmiz1         | 82   | 11.29           | chr14      | 26277135  | 26278605  | -777            | < 0.001 | 26277987                                                                    | yes                        |

**Supplemental Table 4. Summary Statistics of WT1 ChIP-chip Peaks and Motif Discovery.**

| Gene          | Rank | Fold-Enrichment | Chromosome | Start     | End       | Distance to TSS | P-Value | Location of WT1 Matrix/Consensus Site                                                              | WT1 Consensus Site Present |
|---------------|------|-----------------|------------|-----------|-----------|-----------------|---------|----------------------------------------------------------------------------------------------------|----------------------------|
| Nbl1          | 83   | 11.23           | chr4       | 138648061 | 138649348 | -63             | < 0.001 | 138649106                                                                                          | yes                        |
| 6530418L21Rik | 84   | 11.11           | chr3       | 105507676 | 105508702 | 798             | < 0.001 | 105507809, 105507810, 105507816, 105507811, 105507813, 105507814, 105507808, 105507812             | no                         |
| C230071H18Rik | 85   | 11.04           | chr2       | 93028000  | 93028502  | 524             | < 0.001 | 93028345, 93027681                                                                                 | no                         |
| Cxxc4         | 86   | 10.92           | chr3       | 133902077 | 133903838 | 128             | < 0.001 | 133903139; 133903593; 133903151; 133903151; 133903218; 133903217                                   | yes                        |
| Sfrs2ip       | 87   | 10.91           | chr15      | 96291693  | 96291959  | -444            | < 0.001 | 96292004; 96292004                                                                                 | yes                        |
| Pddc1         | 87   | 10.91           | chr7       | 148600090 | 148600810 | -276            | < 0.001 | 148600384; 148600384; 148600429; 148600423; 148600423                                              | yes                        |
| Arnt2         | 88   | 10.9            | chr7       | 91557697  | 91558276  | 457             | < 0.001 | 91558033                                                                                           | yes                        |
| Dcun1d4       | 89   | 10.87           | chr5       | 73882401  | 73883320  | 458             | < 0.001 | 73883068; 73883015                                                                                 | yes                        |
| Ccdc92        | 90   | 10.75           | chr5       | 125343114 | 125343539 | 298             | < 0.001 | 125343552                                                                                          | yes                        |
| Erb2          | 90   | 10.75           | chr11      | 98273670  | 98274011  | 15              | < 0.001 | 98273969; 98273969                                                                                 | yes                        |
| Gabbr1        | 91   | 10.73           | chr17      | 37183107  | 37183956  | 358             | < 0.001 | 37183689; 37183692; 37183701; 37183700                                                             | yes                        |
| BC003212      | 92   | 10.71           | chr13      | 12742905  | 13486616  | -499            | < 0.001 | 12743194                                                                                           | yes                        |
| Smad7         | 92   | 10.71           | chr18      | 75527141  | 75527426  | 268             | < 0.001 | 75527174; 75527174; 75527165; 75527165                                                             | yes                        |
| Raver2        | 93   | 10.65           | chr4       | 100741661 | 100742219 | 246             | < 0.001 | 100741842; 100741981; 100741801                                                                    | yes                        |
| Slc22a17      | 94   | 10.6            | chr14      | 55531699  | 55531891  | 193             | < 0.001 | 55531950; 55531801                                                                                 | yes                        |
| Hivep2        | 95   | 10.56           | chr10      | 13685196  | 13685488  | -964            | < 0.001 | 13686651, 13685409                                                                                 | no                         |
| 5730596B20Rik | 96   | 10.42           | chr6       | 52125537  | 52127316  | 24965           | < 0.001 | 52126090                                                                                           | yes                        |
| Rchyl         | 97   | 10.32           | chr5       | 92391414  | 92391833  | 438             | < 0.001 | 92391765                                                                                           | no                         |
| Rai1          | 98   | 10.3            | chr11      | 59952824  | 59953328  | -452            | < 0.001 | 59953263; 59953266; 59953740; 59953739                                                             | yes                        |
| Tmeff2        | 98   | 10.3            | chr1       | 50984184  | 50984380  | -160            | < 0.001 | 50984184                                                                                           | no                         |
| Usp16         | 99   | 10.29           | chr16      | 87454857  | 87455227  | -245            | < 0.001 | 87455363; 87455363                                                                                 | yes                        |
| Pbx1          | 100  | 10.27           | chr1       | 170361694 | 170362190 | 341             | < 0.001 | 170361694                                                                                          | no                         |
| Myst2         | 101  | 10.15           | chr11      | 95170829  | 95171238  | 551             | < 0.001 | 95171220; 95171223                                                                                 | yes                        |
| Cend2         | 102  | 10.04           | chr6       | 127099244 | 127101942 | 1356            | < 0.001 | 127099980; 127100682; 127099983                                                                    | yes                        |
| Plxdc2        | 103  | 10.03           | chr2       | 16277188  | 16278086  | -56             | < 0.001 | 16278148; 16277617; 16278165                                                                       | yes                        |
| Ap2a1         | 103  | 10.03           | chr7       | 52184691  | 52185225  | -118            | < 0.001 | 52184691                                                                                           | no                         |
| Rasa4         | 104  | 10.02           | chr5       | 136559747 | 136560117 | 139             | < 0.001 | 136559992; 136559995                                                                               | yes                        |
| BC059215      | 105  | 9.94            | chr17      | 47277983  | 47278910  | 116             | < 0.001 | N/A                                                                                                | no                         |
| Man2a1        | 106  | 9.87            | chr17      | 64950234  | 64950602  | -560            | < 0.001 | 64950718                                                                                           | yes                        |
| Foxl1         | 106  | 9.87            | chr8       | 123648556 | 123649438 | -2388           | < 0.001 | 123649348                                                                                          | yes                        |
| Lrrn1         | 107  | 9.86            | chr6       | 107479763 | 107480926 | 648             | < 0.001 | 107479763                                                                                          | no                         |
| B630005N14Rik | 108  | 9.84            | chr6       | 13627674  | 13628513  | 270             | < 0.001 | 13628358                                                                                           | yes                        |
| Fytd1         | 109  | 9.76            | chr16      | 32878034  | 32878352  | 133             | < 0.001 | 32877821, 32877910, 32878180, 32877780, 32878115, 32878018, 32878202                               | no                         |
| Csnk1g3       | 110  | 9.74            | chr18      | 54022582  | 54022800  | 838             | < 0.001 | 54022596                                                                                           | yes                        |
| Ilf3          | 111  | 9.72            | chr9       | 21172241  | 21172558  | 90              | < 0.001 | 21172495; 21172430                                                                                 | yes                        |
| Plxnb1        | 112  | 9.69            | chr9       | 108998328 | 109000281 | 1362            | < 0.001 | 108998582                                                                                          | yes                        |
| Smarca2       | 112  | 9.69            | chr19      | 26680712  | 26682169  | 2215            | < 0.001 | 26679073, 26679022, 26678971, 26681656, 26681787, 26681925, 26682057                               | no                         |
| Ankrd40       | 113  | 9.62            | chr11      | 94189669  | 94189906  | 378             | < 0.001 | 94189711, 94189254, 94189257, 94189263, 94189509, 94189506, 94189503, 94189349, 94189434, 94189500 | no                         |
| Fchsd2        | 114  | 9.61            | chr7       | 108256250 | 108257904 | -828            | < 0.001 | 108256802                                                                                          | yes                        |
| Rcctb1        | 115  | 9.57            | chr14      | 59820301  | 59820521  | 427             | < 0.001 | 59820595                                                                                           | yes                        |
| Fndc3b        | 116  | 9.49            | chr3       | 27609260  | 27609777  | -286            | < 0.001 | 27609684; 27609684; 27609925; 27609523                                                             | yes                        |
| Mettl6        | 117  | 9.47            | chr14      |           | 32308161  | 281             | < 0.001 | 32307568                                                                                           | no                         |
| Ikzf2         | 118  | 9.46            | chr1       | 69733419  | 69734675  | -1572           | < 0.001 | 69733995; 69734001; 69735431; 69734004; 69733998; 69735515; 69735514                               | yes                        |
| Col5a1        | 118  | 9.46            | chr2       | 27741525  | 27742110  | 12              | < 0.001 | 27741781, 27741766, 27742651                                                                       | no                         |
| Phc1          | 119  | 9.42            | chr6       | 122289333 | 122289557 | -2501           | < 0.001 | 122289333                                                                                          | no                         |
| R3hdm1        | 120  | 9.41            | chr1       | 129999944 | 129999989 | 84              | < 0.001 | 130000277                                                                                          | yes                        |

**Supplemental Table 4. Summary Statistics of WT1 ChIP-chip Peaks and Motif Discovery.**

| Gene          | Rank | Fold-Enrichment | Chromosome | Start     | End       | Distance to TSS | P-Value | Location of WT1 Matrix/Consensus Site                                       | WT1 Consensus Site Present |
|---------------|------|-----------------|------------|-----------|-----------|-----------------|---------|-----------------------------------------------------------------------------|----------------------------|
| Ctdsp1        | 121  | 9.39            | chr1       | 74433760  | 74433573  | -4622           | < 0.001 | 74433951; 74433951; 74434160; 74434159                                      | yes                        |
| Mov10         | 122  | 9.37            | chr3       | 104620940 | 104621781 | 58              | < 0.001 | 104621573; 104621573                                                        | yes                        |
| Nptn          | 123  | 9.35            | chr9       | 58430073  | 58430923  | 540             | < 0.001 | 58430561                                                                    | yes                        |
| Pax2          | 124  | 9.26            | chr19      | 44827636  | 44828304  | -3729           | < 0.001 | 44827776                                                                    | yes                        |
| Sall1         | 124  | 9.26            | chr8       | 91566663  | 91567411  | 1027            | < 0.001 | 91567004                                                                    | yes                        |
| Rasa3         | 125  | 9.22            | chr8       | 13677055  | 13677438  | 285             | < 0.001 | 13677467; 13677470                                                          | yes                        |
| Phf13         | 126  | 9.2             | chr4       | 151369706 | 151370644 | -76             | < 0.001 | 151370743; 151370707; 151370707                                             | yes                        |
| Cyp1b1        | 126  | 9.2             | chr17      | 80114849  | 80115239  | -835            | < 0.001 | 80114849                                                                    | no                         |
| Axl           | 127  | 9.17            | chr7       | 26573402  | 26573844  | 28              | < 0.001 | 26573867; 26573866                                                          | yes                        |
| Ptpn1         | 128  | 9.14            | chr2       | 167757840 | 167758157 | 190             | < 0.001 | 167757955; 167757958                                                        | yes                        |
| Rreb1         | 128  | 9.14            | chr13      | 37917589  | 37918943  | -667            | < 0.001 | 37918828; 37917980; 37918874; 37918740                                      | no                         |
| Adams4        | 129  | 9.09            | chr1       | 173182266 | 173182130 | 1046            | < 0.001 | 173182977                                                                   | yes                        |
| Ncor2         | 129  | 9.09            | chr5       | 125657427 | 125658737 | 1494            | < 0.001 | 125658370                                                                   | yes                        |
| Mbnl1         | 130  | 9.07            | chr3       | 60304663  | 60305295  | -342            | < 0.001 | 60305317; 60304840                                                          | yes                        |
| Axud1         | 131  | 9.06            | chr9       | 119891975 | 119893510 | 1588            | < 0.001 | 119892377                                                                   | no                         |
| H2afy2        | 132  | 9.05            | chr10      | 61246217  | 61246375  | 264             | < 0.001 | 61246373                                                                    | yes                        |
| Lamb1-1       | 132  | 9.05            | chr12      | 31949458  | 31950365  | -168            | < 0.001 | 31950280; 31950283                                                          | yes                        |
| Rabepk        | 133  | 9               | chr2       | 34654951  | 34655339  | 332             | < 0.001 | 34655273; 34655210                                                          | no                         |
| Bcor          | 134  | 8.98            | chrX       | 11656755  | 11657894  | -126            | < 0.001 | 11657334; 11657007                                                          | yes                        |
| Txndc5        | 135  | 8.92            | chr13      | 38619884  | 38620663  | 217             | < 0.001 | 38621034                                                                    | yes                        |
| Pim1          | 135  | 8.92            | chr17      | 29626926  | 29627499  | -710            | < 0.001 | 29627513                                                                    | yes                        |
| Zbtb7b        | 136  | 8.91            | chr3       | 89197680  | 89198515  | -781            | < 0.001 | 89198233; 89197688                                                          | yes                        |
| Btbd14a       | 137  | 8.85            | chr2       | 25978262  | 25978853  | -127            | < 0.001 | 25978539; 25978539; 25978552                                                | yes                        |
| Pygl          | 138  | 8.82            | chr12      | 71328236  | 71328664  | 120             | < 0.001 | 71328502; 71328217                                                          | no                         |
| Jun           | 139  | 8.81            | chr4       | 94719458  | 94719864  | -927            | < 0.001 | 94719486; 94719737; 94719354                                                | no                         |
| Bmp4          | 140  | 8.8             | chr14      | 47007581  | 47008501  | 2006            | < 0.001 | 47008524                                                                    | yes                        |
| Optc          | 141  | 8.78            | chr1       | 135805382 | 135805545 | -1656           | < 0.001 | 135805727                                                                   | yes                        |
| 2900024O10Rik | 142  | 8.72            | chr13      | 81850151  | 81850611  | -61             | < 0.001 | 81850005; 81850138                                                          | no                         |
| Smad4         | 143  | 8.7             | chr18      | 73863445  | 73863699  | -73             | < 0.001 | 73863698                                                                    | yes                        |
| B4galt6       | 144  | 8.68            | chr18      | 20904571  | 20904918  | 151             | < 0.001 | 20904869; 20904872                                                          | yes                        |
| 1500005I02Rik | 145  | 8.66            | chr11      | 114656676 | 114656676 | 554             | < 0.001 | 114656453                                                                   | no                         |
| Ywhae         | 146  | 8.61            | chr11      | 75546761  | 75547071  | 608             | < 0.001 | 75547083                                                                    | yes                        |
| Gspt1         | 147  | 8.6             | chr16      | 11253984  | 11254415  | -177            | < 0.001 | 11254336                                                                    | yes                        |
| Lman2l        | 147  | 8.6             | chr1       | 36501895  | 36502527  | -126            | < 0.001 | 36502522                                                                    | yes                        |
| Tmem159       | 147  | 8.6             | chr7       | 127246124 | 127246953 | 427             | < 0.001 | 127246298; 127246298                                                        | yes                        |
| Mnt           | 148  | 8.58            | chr11      | 74643609  | 74645366  | -161            | < 0.001 | 74644620; 74644620                                                          | yes                        |
| Tpbp          | 149  | 8.57            | chr9       | 85736976  | 85737021  | 982             | < 0.001 | 85737116; 85737116                                                          | yes                        |
| Cacnb3        | 150  | 8.54            | chr15      | 98464455  | 98465829  | -308            | < 0.001 | 98465493; 98465854; 98465267                                                | yes                        |
| Tnks          | 151  | 8.5             | chr8       | 36028603  | 36028823  | -56             | < 0.001 | 36028819                                                                    | yes                        |
| Susd4         | 152  | 8.48            | chr1       | 184694771 | 184694670 | -396            | < 0.001 | 184695025; 184695028; 184695274; 184695424; 184695424; 184695022; 184695021 | yes                        |
| Zfp469        | 152  | 8.48            | chr5       | 143577926 | 143579946 | -350            | < 0.001 | 143579353; 143579352; 143578264; 143578264                                  | yes                        |
| Btbd4         | 153  | 8.46            | chr2       | 181193137 | 181193592 | 539             | < 0.001 | 181194995; 181193502; 181193429                                             | no                         |
| Sbsn          | 154  | 8.44            | chr7       | 31536379  | 31536379  | -134            | < 0.001 | 31536331                                                                    | no                         |
| EG330503      | 155  | 8.42            | chr7       | 30954940  | 30955201  | 28              | < 0.001 | 30954913                                                                    | no                         |
| Nid1          | 156  | 8.41            | chr13      | 12794476  | 13531081  |                 | < 0.001 | 12795825; 12794773; 12794772                                                | yes                        |
| Setd5         | 157  | 8.39            | chr6       | 113026201 | 113026893 | -1084           | < 0.001 | 113026700; 113026703; 113026892                                             | yes                        |
| Gldc          | 158  | 8.38            | chr19      | 30249302  | 30250153  | 18              | < 0.001 | 30250213                                                                    | yes                        |
| Tmeff1        | 158  | 8.38            | chr4       | 48597900  | 48598090  | 4               | < 0.001 | 48598082                                                                    | yes                        |
| Nvl           | 159  | 8.37            | chr1       | 183074196 | 183074049 | 70              | < 0.001 | 183074718; 183074721                                                        | yes                        |
| 4-Mar         | 160  | 8.36            | chr1       | 72582957  | 72583150  | 18              | < 0.001 |                                                                             | no                         |
| Mllt6         | 161  | 8.35            | chr11      | 97521073  | 97521499  | -3386           | < 0.001 | 97521227; 97523328; 97523452                                                | no                         |
| H2afz         | 162  | 8.34            | chr3       | 137526934 | 137527396 | -424            | < 0.001 | 137527359                                                                   | yes                        |
| Irx2          | 163  | 8.33            | chr13      | 72766019  | 72766229  | -219            | < 0.001 | 72766283; 72766282                                                          | yes                        |

**Supplemental Table 4. Summary Statistics of WT1 ChIP-chip Peaks and Motif Discovery.**

| Gene          | Rank | Fold-Enrichment | Chromosome | Start     | End       | Distance to TSS | P-Value | Location of WT1 Matrix/Consensus Site                                                             | WT1 Consensus Site Present |
|---------------|------|-----------------|------------|-----------|-----------|-----------------|---------|---------------------------------------------------------------------------------------------------|----------------------------|
| Kcna3         | 164  | 8.31            | chr3       | 106838895 | 106839378 | -161            | < 0.001 | 106839230; 106839230                                                                              | yes                        |
| Asx1l         | 165  | 8.28            | chr2       | 153171881 | 153172301 | 210             | < 0.001 | 153172392; 153172256; 153172256; 153172177; 153172176                                             | yes                        |
| Dlgap3        | 166  | 8.26            | chr4       | 126845938 | 126846210 | -4163           | < 0.001 | 126845987                                                                                         | no                         |
| Ppp1r1b       | 167  | 8.25            | chr11      | 98208997  | 98209843  | -232            | < 0.001 | 98209635; 98209820; 98209820                                                                      | yes                        |
| Slc30a1       | 168  | 8.17            | chr1       | 193730596 | 193730287 | -395            | < 0.001 | 193731253                                                                                         | yes                        |
| Smad3         | 169  | 8.16            | chr9       | 63605810  | 63606524  | -423            | < 0.001 | 63606256; 63606259; 63605922; 63605922; 63606645; 63606645                                        | yes                        |
| Tsc22d1       | 170  | 8.15            | chr14      | 76814635  | 76814928  | -969            | < 0.001 | 76814914; 76814879; 76814878                                                                      | yes                        |
| Accn4         | 171  | 8.14            | chr1       | 75443153  | 75443341  | -3646           | < 0.001 | 75443557; 75443107                                                                                | no                         |
| Ccdc84        | 172  | 8.13            | chr9       | 44226003  | 44226544  | -252            | < 0.001 | 44226445; 44226445                                                                                | yes                        |
| Nfic          | 172  | 8.13            | chr10      | 80889430  | 80889644  | 299             | < 0.001 | 80893958; 80894361; 80889267; 80889719; 80889270; 80892755; 80892761; 80892754                    | no                         |
| Mapk3         | 173  | 8.12            | chr7       | 133903418 | 133903623 | 301             | < 0.001 | 133903333                                                                                         | no                         |
| Slc27a1       | 173  | 8.12            | chr8       | 74093979  | 74094431  | 1315            | < 0.001 | 74093979                                                                                          | no                         |
| Fbn2          | 174  | 8.1             | chr18      | 58369269  | 58370111  | -350            | < 0.001 | 58369526; 58370302; 58370312                                                                      | yes                        |
| Zadh2         | 175  | 8.09            | chr18      | 84256995  | 84258079  | 57              | < 0.001 | 84257589; 84257719                                                                                | yes                        |
| U2af2         | 176  | 8.06            | chr7       | 5012758   | 5013107   | -899            | < 0.001 | N/A                                                                                               | no                         |
| Plekhg2       | 177  | 8.04            | chr7       | 29156402  | 29156933  | 1029            | < 0.001 | 29156988                                                                                          | yes                        |
| Vegfa         | 178  | 8.03            | chr17      | 46167233  | 46168306  | -5606           | < 0.001 | 46168225; 46167783                                                                                | yes                        |
| Ptger1        | 179  | 8.02            | chr8       | 86189997  | 86190283  | -278            | < 0.001 | 86189997                                                                                          | no                         |
| 2700094K13Rik | 180  | 7.99            | chr2       | 84510644  | 84510859  | 29              | < 0.001 | N/A                                                                                               | no                         |
| App           | 181  | 7.98            | chr16      | 85173235  | 85173818  | 572             | < 0.001 | 85173817; 85173817                                                                                | yes                        |
| Hells         | 181  | 7.98            | chr19      | 39005816  | 39006015  | 511             | < 0.001 | 39005816                                                                                          | no                         |
| Epb4.1        | 182  | 7.96            | chr4       | 131629665 | 131630271 | -1994           | < 0.001 | 131630263                                                                                         | yes                        |
| Aldoa         | 183  | 7.93            | chr7       | 133943224 | 133943863 | -1136           | < 0.001 | 133943468; 133943468                                                                              | yes                        |
| Rnpc3         | 183  | 7.93            | chr3       | 113333185 | 113333562 | -148            | < 0.001 | 113333368                                                                                         | yes                        |
| Tgif          | 184  | 7.91            | chr17      | 71200206  | 71201412  | -308            | < 0.001 | 71200838                                                                                          | yes                        |
| Pemt1         | 185  | 7.9             | chr10      | 7382946   | 7382720   | 80              | < 0.001 | 7383811; 7383019                                                                                  | yes                        |
| Rnf138        | 185  | 7.9             | chr18      | 21160096  | 21160677  | 422             | < 0.001 | 21160322; 21160322                                                                                | yes                        |
| Cdc216        | 186  | 7.88            | chr10      | 40069135  | 40069425  | 258             | < 0.001 | 40069405; 40069405                                                                                | yes                        |
| Rhpn2         | 187  | 7.87            | chr7       | 36119163  | 36119739  | 82              | < 0.001 | 36119481                                                                                          | yes                        |
| Luc7l2        | 188  | 7.83            | chr6       | 38500723  | 38500911  | -630            | < 0.001 | 38500974                                                                                          | yes                        |
| Ets1          | 189  | 7.82            | chr9       | 32503755  | 32504044  | 284             | < 0.001 | 32503825                                                                                          | yes                        |
| Tjap1         | 190  | 7.81            | chr17      | 46419401  | 46419835  | 345             | < 0.001 | 46419674                                                                                          | no                         |
| Mmp23         | 191  | 7.8             | chr4       | 155025802 | 155026537 | 1406            | < 0.001 | 155025898                                                                                         | no                         |
| 0610009B22Rik | 192  | 7.78            | chr11      | 51502703  | 51502422  | -447            | < 0.001 | 51503177                                                                                          | yes                        |
| Vamp8         | 193  | 7.77            | chr6       | 72340110  | 72340334  | 266             | < 0.001 | 72340349; 72340349                                                                                | yes                        |
| D10Wsu102e    | 193  | 7.77            | chr10      | 82822683  | 82822597  | -287            | < 0.001 | 82822683                                                                                          | no                         |
| Phf23         | 193  | 7.77            | chr11      | 69809155  | 69810835  | 416             | < 0.001 | 69810334; 69809935; 69810472; 69810130                                                            | no                         |
| Efna5         | 194  | 7.75            | chr17      | 63231462  | 63232326  | -1122           | < 0.001 | 63231462                                                                                          | no                         |
| Kctd15        | 195  | 7.74            | chr7       | 35438431  | 35440530  | -1520           | < 0.001 | 35440262                                                                                          | yes                        |
| Slmap         | 195  | 7.74            | chr14      | 27353929  | 27354274  | -894            | < 0.001 | 27354077; 27354182                                                                                | no                         |
| Mxi1          | 196  | 7.72            | chr19      | 53404584  | 53404914  | -43             | < 0.001 | 53404770; 53404818; 53404679                                                                      | no                         |
| Ptpn12        | 196  | 7.72            | chr5       | 20561278  | 20561843  | 111             | < 0.001 | 20561186; 20561584; 20561807; 20561782; 20561810; 20561574; 20561230                              | no                         |
| Ndfip1        | 197  | 7.69            | chr18      | 38579236  | 38580146  | 1140            | < 0.001 | 38580088; 38580085; 38580097; 38580096                                                            | yes                        |
| Ralb          | 198  | 7.68            | chr1       | 121401767 | 121401436 | -425            | < 0.001 | 121402452; 121402452                                                                              | yes                        |
| Galnt12       | 198  | 7.68            | chr4       | 47104567  | 47105164  | 318             | < 0.001 | 47104766; 47104845; 47104875                                                                      | no                         |
| Npas2         | 199  | 7.67            | chr1       | 39249994  | 39250177  | -963            | < 0.001 | 39250595                                                                                          | yes                        |
| Nab1          | 200  | 7.65            | chr1       | 52556594  | 52556904  | 322             | < 0.001 | 52557440; 52557615; 52556987                                                                      | no                         |
| Gli1          | 201  | 7.64            | chr10      | 126777287 | 126776612 | 1651            | < 0.001 | 126778170; 126777074; 126777080; 126777178; 126777250; 126777247; 126777245; 126777248            | no                         |
| Vps25         | 201  | 7.64            | chr11      | 101120454 | 101120642 | 5558            | < 0.001 | 101121587; 101120975; 101121524; 101121644; 101120978; 101120976; 101121842; 101120674; 101121355 | no                         |
| Rmnd5a        | 202  | 7.61            | chr6       | 71390726  | 71390914  | -266            | < 0.001 | 71390729; 71390729                                                                                | yes                        |
| Ndrp1         | 202  | 7.61            | chr15      | 66799793  | 66800065  | 1165            | < 0.001 | 66799793                                                                                          | no                         |
| Wwe1          | 203  | 7.6             | chr11      | 35793120  | 35792628  | 712             | < 0.001 | 35793672                                                                                          | yes                        |

**Supplemental Table 4. Summary Statistics of WT1 ChIP-chip Peaks and Motif Discovery.**

| Gene          | Rank | Fold-Enrichment | Chromosome | Start     | End       | Distance to TSS | P-Value | Location of WT1 Matrix/Consensus Site                      | WT1 Consensus Site Present |
|---------------|------|-----------------|------------|-----------|-----------|-----------------|---------|------------------------------------------------------------|----------------------------|
| Leng4         | 204  | 7.58            | chr7       | 3643858   | 3644537   | 967             | < 0.001 | 3644623                                                    | yes                        |
| Vamp2         | 204  | 7.58            | chr11      | 68900583  | 68900886  | -1169           | < 0.001 | 68900798                                                   | no                         |
| Nck2          | 205  | 7.57            | chr1       | 43502704  | 43502413  | -409            | < 0.001 | 43503339; 43503339                                         | yes                        |
| Tbc1d1        | 206  | 7.56            | chr5       | 64550825  | 64551602  | -79             | < 0.001 | 64551607                                                   | yes                        |
| Olfml2a       | 207  | 7.53            | chr2       | 38789679  | 38789736  | 2209            | < 0.001 | 38789679                                                   | no                         |
| Beam          | 208  | 7.52            | chr7       | 20353804  | 20354810  | 1223            | < 0.001 | 20354509; 20353976; 20354623; 20353982                     | no                         |
| Sosl          | 208  | 7.52            | chr17      | 80878881  | 80879263  | 889             | < 0.001 | 80879146; 80879145                                         | yes                        |
| Galnt4        | 209  | 7.51            | chr7       | 118922646 | 118923033 | 481             | < 0.001 | 118922932                                                  | yes                        |
| Col18a1       | 210  | 7.5             | chr10      | 76628604  | 76628544  | 463             | < 0.001 | 76628556                                                   | no                         |
| Itrp1         | 210  | 7.5             | chr6       | 108162562 | 108162806 | -309            | < 0.001 | 108163366; 108162909; 108163136; 108162681                 | no                         |
| Ctf1          | 211  | 7.49            | chr7       | 134856293 | 134856487 | 67              | < 0.001 | 134856215; 134856408; 134856414                            | no                         |
| Tead3         | 212  | 7.46            | chr17      | 28487625  | 28488144  | -240            | < 0.001 | 28487896; 28487896                                         | yes                        |
| Isoc2b        | 213  | 7.45            | chr7       | 4817625   | 4817883   | 133             | < 0.001 | 4817792                                                    | no                         |
| Dach1         | 214  | 7.43            | chr14      | 98568757  | 98569268  | -216            | < 0.001 | 98569199; 98568845; 98569204; 98568626                     | no                         |
| Cacna1a       | 215  | 7.42            | chr8       | 86939521  | 86939726  | 442             | < 0.001 | 86939821; 86939786; 86939786                               | yes                        |
| Eif2b4        | 215  | 7.42            | chr5       | 31495305  | 31495353  | 129             | < 0.001 | 31495367                                                   | yes                        |
| Ralgs2        | 216  | 7.41            | chr1       | 158869031 | 158868949 | 653             | < 0.001 | 158869419; 158869422; 158869421; 158869421                 | yes                        |
| Phgdh         | 216  | 7.41            | chr3       | 98143411  | 98144213  | -25             | < 0.001 | 98143956; 98143211; 98143874                               | no                         |
| Ripk5         | 217  | 7.39            | chr1       | 134314632 | 134314935 | 627             | < 0.001 | 134314896; 134314899                                       | yes                        |
| Zcchc3        | 217  | 7.39            | chr2       | 152236949 | 152237169 | 3617            | < 0.001 | 152236929; 152236817                                       | no                         |
| Gtpbp6        | 218  | 7.38            | chr5       | 110536372 | 110537341 | -102            | < 0.001 | 110537416; 110537240; 110537243; 110537416; 110537422      | yes                        |
| Casp2         | 219  | 7.37            | chr6       | 42214842  | 42215834  | -171            | < 0.001 | 42215581; 42215050; 42214977                               | no                         |
| Ibrdc2        | 220  | 7.31            | chr13      | 47217690  | 47218180  | 68              | < 0.001 | 47218253                                                   | yes                        |
| Klf3          | 221  | 7.3             | chr5       | 65194594  | 65194824  | -145            | < 0.001 | 65194750; 65194768; 65194750                               | yes                        |
| Brwd1         | 222  | 7.27            | chr16      | 96303286  | 96303629  | 559             | < 0.001 | 96303765; 96303745; 96303745; 96303408                     | yes                        |
| Ptk7          | 223  | 7.25            | chr17      | 46766682  | 46767221  | -813            | < 0.001 | 46766558; 46766496; 46766875; 46767121; 46766556; 46766555 | no                         |
| Slco3a1       | 223  | 7.25            | chr7       | 81699147  | 81699940  | 292             | < 0.001 | 81699147                                                   | no                         |
| Shox2         | 224  | 7.24            | chr3       | 66784590  | 66785109  | 797             | < 0.001 | 66784590                                                   | no                         |
| 1110007L15Rik | 225  | 7.22            | chr5       | 139728644 | 139729211 | 444             | < 0.001 | 139728886; 139728886                                       | yes                        |
| Gphn          | 225  | 7.22            | chr12      | 79327206  | 79327430  | -312            | < 0.001 | 79327546                                                   | yes                        |
| Epas1         | 226  | 7.21            | chr17      | 87153105  | 87154042  | 653             | < 0.001 | 87153628; 87153627                                         | yes                        |
| Lmo4          | 226  | 7.21            | chr3       | 143868006 | 143869153 | -554            | < 0.001 | 143868385; 143868382; 143868413; 143868412                 | yes                        |
| Mafb          | 226  | 7.21            | chr2       | 160193024 | 160193430 | -468            | < 0.001 | 160193138                                                  | yes                        |
| D930015E06Rik | 227  | 7.2             | chr3       | 83843095  | 83843853  | 739             | < 0.001 | 83842919; 83843198; 83843635; 83843683                     | no                         |
| Sypl2         | 228  | 7.19            | chr3       | 108029012 | 108029751 | 286             | < 0.001 | 108029389; 108029095                                       | yes                        |
| Wipi1         | 228  | 7.19            | chr11      | 109471984 | 109472506 | 561             | < 0.001 | 109471984                                                  | no                         |
| Pogz          | 229  | 7.18            | chr3       | 94641241  | 94641757  | -370            | < 0.001 | 94641567                                                   | yes                        |
| Tera          | 229  | 7.18            | chr6       | 148894658 | 148896207 | -353            | < 0.001 | 148895419; 148894917                                       | yes                        |
| Tmem38a       | 230  | 7.17            | chr8       | 75096409  | 75096458  | 433             | < 0.001 | 75095822                                                   | no                         |
| Klf16         | 231  | 7.16            | chr10      | 80040404  | 80039920  | 143             | < 0.001 | 80040873; 80040718; 80040718; 80040775; 80040775           | yes                        |
| Sox2          | 232  | 7.15            | chr3       | 34548253  | 34548969  | -328            | < 0.001 | 34548944                                                   | yes                        |
| St3gal6       | 233  | 7.14            | chr16      | 58523710  | 58524070  | -309            | < 0.001 | 58523710                                                   | no                         |
| Tmem106b      | 234  | 7.12            | chr6       | 13019960  | 13020361  | 289             | < 0.001 | 13020031                                                   | yes                        |
| Slc2a1        | 235  | 7.09            | chr4       | 118781814 | 118782192 | 666             | < 0.001 | 118781955; 118782027; 118782027                            | yes                        |
| Tmem55a       | 236  | 7.06            | chr4       | 14791322  | 14791830  | 251             | < 0.001 | 14791539; 14791862; 14791862; 14791868                     | yes                        |
| Sstr3         | 237  | 7.05            | chr15      | 78374045  | 78375374  | -125            | < 0.001 | 78374933; 78375359; 78374017; 78375142; 78374679           | no                         |
| Ncam1         | 238  | 7.04            | chr9       | 49605721  | 49606397  | 1428            | < 0.001 | 49605729                                                   | yes                        |
| Thumpd3       | 239  | 7.03            | chr6       | 112996534 | 112996799 | 348             | < 0.001 | 112996534                                                  | no                         |
| Dnaja1        | 240  | 7.02            | chr4       | 40669340  | 40669547  | -198            | < 0.001 | 40669647                                                   | yes                        |
| Mrgpre        | 240  | 7.02            | chr7       | 150969386 | 150969756 | 607             | < 0.001 | 150969386                                                  | no                         |
| Dbp           | 241  | 7               | chr7       | 52961744  | 52962397  | 1629            | < 0.001 | 52963359; 52962083                                         | yes                        |
| Pag1          | 241  | 7               | chr3       | 9834125   | 9834886   | -716            | < 0.001 | 9834125                                                    | no                         |

**Supplemental Table 4. Summary Statistics of WT1 ChIP-chip Peaks and Motif Discovery.**

| Gene          | Rank | Fold-Enrichment | Chromosome | Start     | End       | Distance to TSS | P-Value | Location of WT1 Matrix/Consensus Site                 | WT1 Consensus Site Present |
|---------------|------|-----------------|------------|-----------|-----------|-----------------|---------|-------------------------------------------------------|----------------------------|
| Fahd1         | 242  | 6.99            | chr17      | 24986816  | 24987041  | 229             | < 0.001 | 24986816                                              | no                         |
| Gpd1          | 242  | 6.99            | chr15      | 99554990  | 99555395  | 7345            | < 0.001 | 99555476; 99555476                                    | yes                        |
| Tmem164       | 243  | 6.98            | chrX       | 139115480 | 139116144 | 162             | < 0.001 | 139115480                                             | no                         |
| Hoxb9         | 244  | 6.97            | chr11      | 96132058  | 96132549  | -121            | < 0.001 | 96133494                                              | yes                        |
| 4930548G07Rik | 244  | 6.97            | chr14      | 57287225  | 57287803  | 521             | < 0.001 | 57287225                                              | no                         |
| Cbx3          | 245  | 6.96            | chr6       | 51420739  | 51420946  | 310             | < 0.001 | 51420739                                              | no                         |
| Hivep1        | 246  | 6.92            | chr13      | 42146392  | 42147991  | 453             | < 0.001 | 42147574; 42147577; 42147386; 42147385                | yes                        |
| Jmjd3         | 247  | 6.91            | chr11      | 69229998  | 69229730  | -2209           | < 0.001 | 69230816                                              | yes                        |
| Kcna1         | 247  | 6.91            | chr6       | 126594565 | 126595206 | 635             | < 0.001 | 126595098; 126595259; 126595259                       | yes                        |
| S100a11       | 248  | 6.9             | chr3       | 93324680  | 93324922  | 479             | < 0.001 | 93324680                                              | no                         |
| Stag1         | 248  | 6.9             | chr9       | 100543211 | 100543473 | -597            | < 0.001 | 100543552, 100543588, 100543598, 100543624, 100543576 | no                         |
| Fgf11         | 248  | 6.9             | chr11      | 69614608  | 69614821  | 332             | < 0.001 | 69614735; 69614735                                    | yes                        |
| Ptch1         | 249  | 6.87            | chr13      | 63665972  | 63666429  | 532             | < 0.001 | 63666355                                              | yes                        |
| 1700025G04Rik | 250  | 6.86            | chr1       | 153937671 | 153937237 | 261             | < 0.001 | 153938716                                             | yes                        |
| Rhbdf1        | 251  | 6.85            | chr11      | 32121292  | 32121704  | 764             | < 0.001 | 32121609; 32121612                                    | yes                        |
| Rnf24         | 251  | 6.85            | chr2       | 131178316 | 131178836 | -247            | < 0.001 | 131179350; 131179350; 131179313; 131178960            | yes                        |
| Slc9a3r1      | 252  | 6.84            | chr11      | 115024053 | 115024332 | -348            | < 0.001 | 115024177                                             | no                         |
| Cbx6          | 253  | 6.83            | chr15      | 79664769  | 79665412  | -217            | < 0.001 | 79664922; 79665712; 79665749                          | yes                        |
| BC064815      | 253  | 6.83            | chr10      | 92623832  | 92624312  | 866             | < 0.001 | 92624509; 92624509                                    | yes                        |
| Mms19l        | 254  | 6.82            | chr19      | 42055086  | 42055419  | 343             | < 0.001 | 42055086                                              | no                         |
| Map4k4        | 255  | 6.8             | chr1       | 39959028  | 39958967  | 1301            | < 0.001 | 39959290                                              | yes                        |
| Tbx2          | 255  | 6.8             | chr11      | 85646086  | 85646476  | 208             | < 0.001 | 85646622; 85646625                                    | yes                        |
| Wnt1          | 255  | 6.8             | chr15      | 98619938  | 98620297  | -323            | < 0.001 | 98620360                                              | yes                        |
| Pitpnc1       | 256  | 6.79            | chr11      | 107330700 | 107331647 | 414             | < 0.001 | 107331214                                             | yes                        |
| Slain1        | 256  | 6.79            | chr14      | 104050233 | 104050393 | 799             | < 0.001 | 104050376; 104050376; 104050387                       | yes                        |
| Trim62        | 257  | 6.78            | chr4       | 128560636 | 128561129 | -449            | < 0.001 | 128560957; 128560957                                  | yes                        |
| Slc29a1       | 258  | 6.76            | chr17      | 45732419  | 45733459  | -3330           | < 0.001 | 45733088; 45733091                                    | yes                        |
| Bnip3l        | 258  | 6.76            | chr14      | 67627652  | 67628194  | -336            | < 0.001 | 67628214; 67628214                                    | yes                        |
| Fst           | 258  | 6.76            | chr13      | 115249261 | 115249777 | -634            | < 0.001 | 115249809; 115249389                                  | yes                        |
| Arf5          | 259  | 6.75            | chr6       | 28373988  | 28374033  | 371             | < 0.001 | 28374011                                              | yes                        |
| Ralgds        | 259  | 6.75            | chr2       | 28369914  | 28370312  | 1437            | < 0.001 | 28370449                                              | yes                        |
| Top1          | 259  | 6.75            | chr2       | 160472318 | 160472495 | 710             | < 0.001 | 160472619                                             | yes                        |
| Dedd          | 260  | 6.73            | chr1       | 173259588 | 173260212 | 169             | < 0.001 | 173259753; 173259753; 173259622                       | yes                        |
| Itpr2         | 261  | 6.71            | chr6       | 146450991 | 146451138 | -680            | < 0.001 | 146450991                                             | no                         |
| Vgf           | 261  | 6.71            | chr5       | 137508287 | 137508475 | 2146            | < 0.001 | N/A                                                   | no                         |
| 4930546H06Rik | 262  | 6.7             | chr17      | 17964255  | 17965263  | -2210           | < 0.001 | 17964298                                              | yes                        |
| Rasal1        | 262  | 6.7             | chr5       | 121098212 | 121099052 | 200             | < 0.001 | 121098964                                             | yes                        |
| Isyna1        | 262  | 6.7             | chr8       | 73117265  | 73117923  | -641            | < 0.001 | 73117265                                              | no                         |
| Ephb1         | 263  | 6.69            | chr9       | 102257069 | 102257119 | -131            | < 0.001 | 102257069                                             | no                         |
| 2310033P09Rik | 264  | 6.68            | chr11      | 59021977  | 59021785  | 138             | < 0.001 | 59022271                                              | yes                        |
| 5033428A16Rik | 264  | 6.68            | chr8       | 90642558  | 90643265  | 105             | < 0.001 | 90643320                                              | yes                        |
| Cd63          | 265  | 6.67            | chr10      | 128347610 | 128347776 | 833             | < 0.001 | 128347724                                             | yes                        |
| Slit3         | 265  | 6.67            | chr11      | 34935290  | 34935979  | 523             | < 0.001 | 34936257; 34936257; 34935656; 34935655                | yes                        |
| Ric8b         | 266  | 6.65            | chr10      | 84380277  | 84380580  | 158             | < 0.001 | 84380608; 84380667                                    | yes                        |
| Glul          | 267  | 6.64            | chr1       | 155748095 | 155747683 | 906             | < 0.001 | 155748095                                             | no                         |
| BC049664      | 267  | 6.64            | chr12      | 12269302  | 12269671  | 502             | < 0.001 | 12269802                                              | yes                        |
| Igsf8         | 268  | 6.63            | chr1       | 174243052 | 174242684 | 289             | < 0.001 | 174243208; 174243208; 174243447; 174243446            | yes                        |
| Plat          | 268  | 6.63            | chr8       | 23868888  | 23869245  | 845             | < 0.001 | 23870348; 23869437                                    | yes                        |
| Spry2         | 269  | 6.6             | chr14      | 106296835 | 106297186 | -938            | < 0.001 | 106296835                                             | no                         |
| Niban         | 270  | 6.59            | chr1       | 153418364 | 153418150 | -270            | < 0.001 | 153418364                                             | no                         |
| Pthr1         | 270  | 6.59            | chr9       | 110644837 | 110645636 | -288            | < 0.001 | 110645092; 110645095; 110645458                       | yes                        |
| 9430071P14Rik | 271  | 6.58            | chr6       | 37999058  | 37999219  | 75390           | < 0.001 | 37999058                                              | no                         |

**Supplemental Table 4. Summary Statistics of WT1 ChIP-chip Peaks and Motif Discovery.**

| Gene          | Rank | Fold-Enrichment | Chromosome | Start     | End       | Distance to TSS | P-Value | Location of WT1 Matrix/Consensus Site                                                                                                                | WT1 Consensus Site Present |
|---------------|------|-----------------|------------|-----------|-----------|-----------------|---------|------------------------------------------------------------------------------------------------------------------------------------------------------|----------------------------|
| AI597468      | 271  | 6.58            | chr10      | 84566101  | 84566009  | 606             | < 0.001 | 84565322, 84565313, 84565560, 84565557, 84565283, 84565505, 84565554, 84566051, 84565767, 84565761, 84565472, 84565421, 84566200, 84565451, 84565410 | no                         |
| Prkg2         | 272  | 6.57            | chr5       | 99465568  | 99466474  | -354            | < 0.001 | 99466138, 99466119, 99466195                                                                                                                         | no                         |
| Pwwp2         | 273  | 6.55            | chr7       | 146433827 | 146435309 | 242             | < 0.001 | 146434587; 146435237                                                                                                                                 | yes                        |
| Arvcf         | 274  | 6.54            | chr16      | 18343807  | 18344629  | -4228           | < 0.001 | 18344363; 18344366; 18344187; 18344186                                                                                                               | yes                        |
| Wnk1          | 275  | 6.53            | chr6       | 119987911 | 119988641 | -821            | < 0.001 | 119989173, 119988189, 119987772                                                                                                                      | no                         |
| Snap29        | 276  | 6.5             | chr16      | 17405335  | 17405966  | -450            | < 0.001 | 17406219                                                                                                                                             | yes                        |
| Ikbkap        | 276  | 6.5             | chr4       | 56815316  | 56815744  | -377            | < 0.001 | 56815442                                                                                                                                             | no                         |
| Zbtb37        | 276  | 6.5             | chr1       | 162964732 | 162964964 | -552            | < 0.001 | 162964864, 162964647, 162964653, 162964635                                                                                                           | no                         |
| Abi2          | 277  | 6.49            | chr1       | 60467153  | 60466960  | 297             | < 0.001 | 60467872; 60467701                                                                                                                                   | yes                        |
| Dr1           | 277  | 6.49            | chr5       | 108697451 | 108697703 | -239            | < 0.001 | 108697451                                                                                                                                            | no                         |
| Rnd3          | 278  | 6.48            | chr2       | 51002754  | 51003691  | 1851            | < 0.001 | 51003407; 51003407                                                                                                                                   | yes                        |
| L1cam         | 278  | 6.48            | chrX       | 71125977  | 71126933  | -247            | < 0.001 | 71126411                                                                                                                                             | yes                        |
| Ube2t         | 279  | 6.45            | chr1       | 136858855 | 136859277 | -31             | < 0.001 | 136858951; 136858951                                                                                                                                 | yes                        |
| Top1111       | 280  | 6.44            | chr2       | 104552434 | 104552678 | -332            | < 0.001 | 104552558; 104552531; 104552776                                                                                                                      | yes                        |
| Pex19         | 281  | 6.43            | chr1       | 174057179 | 174057015 | 90              | < 0.001 | 174057498                                                                                                                                            | yes                        |
| VeZF1         | 281  | 6.43            | chr11      | 87880929  | 87882755  | 533             | < 0.001 | 87882857; 87882857; 87882313; 87882036; 87882035                                                                                                     | yes                        |
| Lasp1         | 281  | 6.43            | chr11      | 97660313  | 97660660  | -475            | < 0.001 | 97660313                                                                                                                                             | no                         |
| 2610024E20Rik | 282  | 6.42            | chr18      | 34666560  | 34667009  | -298            | < 0.001 | 34666616; 34666616                                                                                                                                   | yes                        |
| Tex264        | 283  | 6.4             | chr9       | 106587991 | 106588781 | -341            | < 0.001 | 106588559                                                                                                                                            | yes                        |
| Ecd3          | 284  | 6.39            | chr9       | 57556329  | 57556479  | -23             | < 0.001 | 57556571                                                                                                                                             | yes                        |
| Cecr6         | 284  | 6.39            | chr6       | 120443206 | 120444687 | -275            | < 0.001 | 120444212; 120444212; 120444177; 120444218; 120444218; 120443779; 120443778                                                                          | yes                        |
| Uck2          | 284  | 6.39            | chr1       | 169214525 | 169214245 | 1038            | < 0.001 | 169215048                                                                                                                                            | yes                        |
| Wdr22         | 284  | 6.39            | chr12      | 81536375  | 81536716  | 1014            | < 0.001 | 81536317                                                                                                                                             | no                         |
| E130309F12Rik | 285  | 6.38            | chr4       | 49072026  | 49072408  | -95             | < 0.001 | 49072112, 49072122, 49072279, 49072268, 49072116                                                                                                     | no                         |
| Wasl          | 286  | 6.37            | chr6       | 24614170  | 24615073  | 420             | < 0.001 | 24615180; 24615212                                                                                                                                   | yes                        |
| Pum2          | 286  | 6.37            | chr12      | 8681056   | 8681641   | 132             | < 0.001 | 8681224                                                                                                                                              | yes                        |
| Nr2f6         | 287  | 6.36            | chr8       | 73904674  | 73904940  | 933             | < 0.001 | 73904928; 73904928                                                                                                                                   | yes                        |
| Ldlrad3       | 287  | 6.36            | chr2       | 102025868 | 102026104 | 452             | < 0.001 | N/A                                                                                                                                                  | no                         |
| Ing2          | 288  | 6.34            | chr8       | 48759591  | 48759878  | 658             | < 0.001 | 48759433                                                                                                                                             | no                         |
| Ppm1d         | 289  | 6.32            | chr11      | 85124173  | 85124688  | -89             | < 0.001 | 85124815                                                                                                                                             | yes                        |
| Vasn          | 289  | 6.32            | chr16      | 4640187   | 4640719   | 390             | < 0.001 | 4640187                                                                                                                                              | no                         |
| AW049604      | 290  | 6.31            | chr15      | 87455391  | 87455924  | -245            | < 0.001 | 87455789; 87455792; 87455820                                                                                                                         | yes                        |
| Gad2          | 290  | 6.31            | chr2       | 22477850  | 22478016  | 27              | < 0.001 | 22477962                                                                                                                                             | yes                        |
| Tmem53        | 290  | 6.31            | chr4       | 116924690 | 116924860 | 119             | < 0.001 | 116924574, 116924776, 116924606                                                                                                                      | no                         |
| Pigp          | 291  | 6.29            | chr16      | 94591846  | 94592231  | -140            | < 0.001 | 94592380                                                                                                                                             | yes                        |
| Kif5c         | 291  | 6.29            | chr2       | 49475777  | 49476147  | 1284            | < 0.001 | 49475955; 49475926                                                                                                                                   | yes                        |
| Kpnb1         | 291  | 6.29            | chr11      | 97048471  | 97049080  | 328             | < 0.001 | N/A                                                                                                                                                  | no                         |
| Pde10a        | 292  | 6.28            | chr17      | 8993899   | 8994191   | -441            | < 0.001 | 8994222; 8994222                                                                                                                                     | yes                        |
| Pik3r1        | 292  | 6.28            | chr13      | 102464837 | 102465254 | -2379           | < 0.001 | 102465264; 102465264                                                                                                                                 | yes                        |
| T2bp          | 292  | 6.28            | chr3       | 127492772 | 127493120 | 268             | < 0.001 | 127493156                                                                                                                                            | yes                        |
| Ngdn          | 292  | 6.28            | chr14      | 55633596  | 55633910  | -740            | < 0.001 | 55633578, 55633584                                                                                                                                   | no                         |
| Bub1b         | 293  | 6.27            | chr2       | 118423833 | 118424145 | 32              | < 0.001 | 118423937                                                                                                                                            | no                         |
| 2900093B09Rik | 294  | 6.26            | chr7       | 48154340  | 48154952  | -285            | < 0.001 | 48154461; 48154461; 48155098; 48155098                                                                                                               | yes                        |
| Ssx2ip        | 294  | 6.26            | chr3       | 146067207 | 146067558 | -114            | < 0.001 | 146067675                                                                                                                                            | yes                        |
| Rprc1         | 294  | 6.26            | chr4       | 125932390 | 125933014 | 689             | < 0.001 | 125932239, 125932769, 125932611, 125932617, 125933981, 125934230, 125934236                                                                          | no                         |
| Capn1         | 294  | 6.26            | chr19      | 6015069   | 6015817   | -365            | < 0.001 | 6015867; 6015523                                                                                                                                     | yes                        |
| 5730420B22Rik | 295  | 6.25            | chr14      | 45838540  | 45838940  | 151             | < 0.001 | 45839030, 45838970                                                                                                                                   | no                         |
| Pomp          | 296  | 6.24            | chr5       | 148671896 | 148672419 | 47              | < 0.001 | 148672315; 148672315                                                                                                                                 | yes                        |
| Cmtm8         | 297  | 6.23            | chr9       | 114753279 | 114753975 | -361            | < 0.001 | 114753468                                                                                                                                            | yes                        |
| Zfp191        | 297  | 6.23            | chr18      | 24179439  | 24179929  | -304            | < 0.001 | 24179581                                                                                                                                             | yes                        |

**Supplemental Table 4. Summary Statistics of WT1 ChIP-chip Peaks and Motif Discovery.**

| Gene          | Rank | Fold-Enrichment | Chromosome | Start     | End       | Distance to TSS | P-Value | Location of WT1 Matrix/Consensus Site                                                  | WT1 Consensus Site Present |
|---------------|------|-----------------|------------|-----------|-----------|-----------------|---------|----------------------------------------------------------------------------------------|----------------------------|
| Ptpra         | 297  | 6.23            | chr2       | 130276039 | 130276925 | -213            | < 0.001 | 130276223, 130276352, 130276258, 130276794, 130276061, 130276157, 130276154, 130276160 | no                         |
| Ern1          | 298  | 6.22            | chr11      | 106349391 | 106350063 | -437            | < 0.001 | 106349206, 106349200, 106349276                                                        | no                         |
| Evp1          | 298  | 6.22            | chr11      | 116103208 | 116103856 | -4062           | < 0.001 | 116103208                                                                              | no                         |
| Cobl1         | 299  | 6.21            | chr2       | 65076709  | 65077445  | -433            | < 0.001 | 65077147; 65077089; 65077450; 65077150                                                 | yes                        |
| Crabp2        | 299  | 6.21            | chr3       | 87750927  | 87751209  | -1432           | < 0.001 | 87751337; 87751336                                                                     | yes                        |
| Thbs1         | 300  | 6.2             | chr2       | 117937259 | 117937635 | -370            | < 0.001 | 117937749; 117937615; 117937615; 117937752                                             | yes                        |
| Hibadh        | 301  | 6.19            | chr6       | 52590486  | 52590717  | -219            | < 0.001 | 52590543, 52590414                                                                     | no                         |
| Trim3         | 302  | 6.18            | chr7       | 112781611 | 112781962 | 235             | < 0.001 | 112781802, 112781916                                                                   | no                         |
| Paxip1        | 303  | 6.17            | chr5       | 28117756  | 28117994  | 101             | < 0.001 | 28117885; 28118140                                                                     | yes                        |
| Wdfy1         | 303  | 6.17            | chr1       | 79758128  | 79757982  | 384             | < 0.001 | 79758108                                                                               | no                         |
| Paip2         | 304  | 6.16            | chr18      | 35758346  | 35758652  | 302             | < 0.001 | 35758533                                                                               | yes                        |
| Tef           | 304  | 6.16            | chr15      | 81641068  | 81641121  | -808            | < 0.001 | 81641418                                                                               | yes                        |
| Plxdc1        | 304  | 6.16            | chr11      | 97847174  | 97847368  | 348             | < 0.001 | 97847457; 97847457                                                                     | yes                        |
| Col4a5        | 305  | 6.15            | chrX       | 137909944 | 137910926 | 237             | < 0.001 | 137909926, 137911114                                                                   | no                         |
| Myo7b         | 305  | 6.15            | chr18      | 32196506  | 32196726  | -85             | < 0.001 | 32196506                                                                               | no                         |
| D730040F13Rik | 306  | 6.13            | chr4       | 56960116  | 56960515  | -191            | < 0.001 | 56960518; 56960536; 56960536                                                           | yes                        |
| Nt5c2         | 307  | 6.12            | chr19      | 47037017  | 47037072  | -246            | < 0.001 | 47037024; 47037027                                                                     | yes                        |
| Pcdh7         | 307  | 6.12            | chr5       | 58107160  | 58107603  | -1953           | < 0.001 | 58107892                                                                               | yes                        |
| Ncoa2         | 307  | 6.12            | chr1       | 13364474  | 13364662  | -332            | < 0.001 | 13363172, 13363221, 13364280, 13364351                                                 | no                         |
| Ubpap2l       | 307  | 6.12            | chr3       | 89855750  | 89856277  | 443             | < 0.001 | 89855677, 89855837, 89856208, 89856048, 89856043                                       | no                         |
| Igf1r         | 308  | 6.11            | chr7       | 75096138  | 75096355  | -982            | < 0.001 | 75096138                                                                               | no                         |
| Kcnj8         | 308  | 6.11            | chr6       | 142519670 | 142520325 | 40              | < 0.001 | 142520094, 142520259                                                                   | no                         |
| Elov16        | 308  | 6.11            | chr3       | 129235802 | 129236615 | 1179            | < 0.001 | N/A                                                                                    | no                         |
| Alms1         | 309  | 6.1             | chr6       | 85537796  | 85538235  | 576             | < 0.001 | 85538139; 85538139; 85538146; 85538151; 85538145                                       | yes                        |
| Ninj1         | 310  | 6.08            | chr13      | 49282919  | 49283194  | 27              | < 0.001 | 49283077                                                                               | yes                        |
| Rhog          | 311  | 6.07            | chr7       | 109398502 | 109398954 | -299            | < 0.001 | 109398886; 109398775                                                                   | yes                        |
| Tubb2b        | 312  | 6.06            | chr13      | 34221621  | 34221889  | 363             | < 0.001 | 34221879                                                                               | yes                        |
| 2600010E01Rik | 312  | 6.06            | chr2       | 101637242 | 101638237 | -166            | < 0.001 | 101637479, 101637958, 101637935                                                        | no                         |
| BC067054      | 313  | 6.05            | chr3       | 95622734  | 95623631  | -129            | < 0.001 | 95623609; 95623609                                                                     | yes                        |
| Etf1          | 314  | 6.04            | chr18      | 35091233  | 35091284  | 399             | < 0.001 | 35091355                                                                               | yes                        |
| Plec1         | 315  | 6.03            | chr15      | 76028337  | 76028933  | -163            | < 0.001 | 76028830; 76029032; 76029032                                                           | yes                        |
| Akp2          | 315  | 6.03            | chr4       | 137352188 | 137352422 | 82              | < 0.001 | 137352443; 137352312                                                                   | yes                        |
| Sfxn3         | 315  | 6.03            | chr19      | 45119804  | 45119858  | -2332           | < 0.001 | N/A                                                                                    | no                         |
| Apeh          | 316  | 6.02            | chr9       | 107997152 | 107997525 | -392            | < 0.001 | 107997457; 107997457                                                                   | yes                        |
| Phka2         | 316  | 6.02            | chrX       | 156940212 | 156940861 | -156            | < 0.001 | 156940744; 156940747                                                                   | yes                        |
| Plekhc1       | 316  | 6.02            | chr14      | 46149149  | 46150611  | 52              | < 0.001 | 46150024; 46149562                                                                     | yes                        |
| Mrpl48        | 317  | 6.01            | chr7       | 107756874 | 107757209 | 722             | < 0.001 | 107757019                                                                              | yes                        |
| Ptprg         | 318  | 6               | chr14      | 12386787  | 12387612  | 936             | < 0.001 |                                                                                        | no                         |
| Ap2a2         | 319  | 5.99            | chr7       | 148748606 | 148748791 | 550             | < 0.001 | 12386787                                                                               | no                         |
| Ccdc102a      | 320  | 5.97            | chr8       | 97441560  | 97441762  | 211             | < 0.001 | 148748606                                                                              | yes                        |
| Trappc4       | 321  | 5.96            | chr9       | 44214960  | 44215412  | 649             | < 0.001 | 44214929, 44215146                                                                     | no                         |
| Nfkb2         | 321  | 5.96            | chr19      | 46380480  | 46380527  | 397             | < 0.001 | 46380594; 46380594                                                                     | yes                        |
| Myo9b         | 322  | 5.95            | chr8       | 73796754  | 73797123  | 488             | < 0.001 | 73796636; 73796583                                                                     | no                         |
| Lef1          | 322  | 5.95            | chr3       | 130814332 | 130815403 | 1166            | < 0.001 | 130815144; 130817051; 130815133; 130815647; 130815646                                  | yes                        |
| Rufy4         | 323  | 5.94            | chr1       | 74171225  | 74171389  | -748            | < 0.001 | 74171364; 74171363                                                                     | yes                        |
| B930006L02Rik | 323  | 5.94            | chr7       | 107855205 | 107855569 | 13              | < 0.001 | 107855312; 107855315                                                                   | yes                        |
| Gm266         | 323  | 5.94            | chr12      | 112724129 | 112725777 | -1527           | < 0.001 | 112725486, 112724594, 112724851                                                        | no                         |
| Khsrp         | 323  | 5.94            | chr17      | 57170218  | 57170402  | 551             | < 0.001 | 57170218                                                                               | no                         |
| Fgfr2         | 324  | 5.93            | chr7       | 137409139 | 137409581 | 922             | < 0.001 | 137409433                                                                              | yes                        |
| D930005D10Rik | 324  | 5.93            | chr5       | 143026191 | 143026585 | 469             | < 0.001 | 143026191                                                                              | no                         |
| Frmf6         | 325  | 5.92            | chr12      | 71926104  | 71926501  | -370            | < 0.001 | 71926627; 71926627                                                                     | yes                        |
| G6pc3         | 325  | 5.92            | chr11      | 102051127 | 102051357 | 138             | < 0.001 | 102051116, 102051078, 102051062                                                        | no                         |
| AA407270      | 326  | 5.91            | chr9       | 71439405  | 71440472  | -93             | < 0.001 | 71440347                                                                               | yes                        |

**Supplemental Table 4. Summary Statistics of WT1 ChIP-chip Peaks and Motif Discovery.**

| Gene          | Rank | Fold-Enrichment | Chromosome | Start     | End       | Distance to TSS | P-Value | Location of WT1 Matrix/Consensus Site                                                                                  | WT1 Consensus Site Present |
|---------------|------|-----------------|------------|-----------|-----------|-----------------|---------|------------------------------------------------------------------------------------------------------------------------|----------------------------|
| Fzd7          | 326  | 5.91            | chr1       | 59539423  | 59539798  | 456             | < 0.001 | 59540074; 59540037; 59540037                                                                                           | yes                        |
| St3gal5       | 327  | 5.9             | chr6       | 72047426  | 72048143  | -4              | < 0.001 | 72047753; 72047756; 72047791                                                                                           | yes                        |
| Hnrpk         | 327  | 5.9             | chr13      | 58503962  | 58504199  | -299            | < 0.001 | 58503962                                                                                                               | no                         |
| Atoh8         | 328  | 5.89            | chr6       | 72184349  | 72185966  | -35             | < 0.001 | 72185197, 72185539, 72185542, 72184775, 72184598, 72184769, 72185174, 72184673                                         | no                         |
| Slc4a2        | 328  | 5.89            | chr5       | 23931419  | 23932150  | 393             | < 0.001 | 23931292, 23931294                                                                                                     | no                         |
| Tenc1         | 328  | 5.89            | chr15      | 101932217 | 101934231 | 790             | < 0.001 | 101932936; 101932935                                                                                                   | yes                        |
| Ccdc58        | 329  | 5.88            | chr16      | 36071911  | 36072497  | 554             | < 0.001 | 36071597, 36072406, 36071680                                                                                           | no                         |
| Homer1        | 329  | 5.88            | chr13      | 94073238  | 94073656  | -1001           | < 0.001 | 94073636                                                                                                               | no                         |
| Mllt7         | 330  | 5.87            | chrX       | 98450032  | 98450184  | 191             | < 0.001 | 98450974, 98451086                                                                                                     | no                         |
| Klf10         | 331  | 5.86            | chr15      | 38231020  | 38231764  | -892            | < 0.001 | 38231479; 38231482; 38231179; 38231340; 38231343; 38231122; 38231122                                                   | yes                        |
| 4631426J05Rik | 332  | 5.85            | chr7       | 139507500 | 139508332 | 1064            | < 0.001 | 139508225                                                                                                              | yes                        |
| C2ta          | 332  | 5.85            | chr16      | 10489795  | 10490339  | 1797            | < 0.001 | 10490454; 10490454                                                                                                     | yes                        |
| Zfp597        | 332  | 5.85            | chr16      | 3872026   | 3872689   | 156             | < 0.001 | 3872551; 3872551                                                                                                       | yes                        |
| D930049A15Rik | 332  | 5.85            | chr14      | 26280054  | 26280624  | 1483            | < 0.001 | 26280335, 26280142, 26280094, 26280134, 26279869, 26276583, 26276585, 26276586, 26276584, 26276588, 26276510, 26277340 | no                         |
| Agpat7        | 333  | 5.84            | chr2       | 112080231 | 112080431 | 411             | < 0.001 | 112080339                                                                                                              | no                         |
| Pgm2l1        | 333  | 5.84            | chr7       | 107375935 | 107376343 | -156            | < 0.001 | 107376290; 107376310; 107376290                                                                                        | yes                        |
| Lmo6          | 334  | 5.83            | chrX       | 7235015   | 7235698   | -192            | < 0.001 | 7235780; 7235783                                                                                                       | yes                        |
| Lck           | 335  | 5.82            | chr4       | 129233406 | 129233772 | 1870            | < 0.001 | 7235579                                                                                                                | no                         |
| Ptfr          | 336  | 5.81            | chr11      | 100830389 | 100831020 | 1239            | < 0.001 | 100830949; 100831002                                                                                                   | yes                        |
| Rusc1         | 336  | 5.81            | chr3       | 88897370  | 88897536  | -108            | < 0.001 | 88897308, 88897340                                                                                                     | no                         |
| Jag1          | 337  | 5.79            | chr2       | 136940347 | 136941094 | 1238            | < 0.001 | 136940726                                                                                                              | yes                        |
| Ppia          | 337  | 5.79            | chr11      | 6316475   | 6316665   | 633             | < 0.001 | 6316475                                                                                                                | no                         |
| Cyp46a1       | 338  | 5.78            | chr12      | 109572343 | 109572394 | -222            | < 0.001 | 109572726; 109572646                                                                                                   | yes                        |
| Hadhb         | 338  | 5.78            | chr5       | 30481870  | 30482020  | 31              | < 0.001 | 30481811                                                                                                               | no                         |
| Ppp5c         | 339  | 5.77            | chr7       | 17613374  | 17613428  | -182            | < 0.001 | 17613529; 17613532                                                                                                     | yes                        |
| Pdia4         | 339  | 5.77            | chr6       | 47763265  | 47763883  | -345            | < 0.001 | 47763853                                                                                                               | yes                        |
| Ints3         | 339  | 5.77            | chr3       | 90237084  | 90237312  | 268             | < 0.001 | 90237084                                                                                                               | no                         |
| Cret1         | 340  | 5.76            | chr3       | 92818464  | 92819010  | 775             | < 0.001 | 92818814                                                                                                               | yes                        |
| Sert1         | 341  | 5.75            | chr15      | 76350195  | 76350560  | 2341            | < 0.001 | 76350547; 76350569; 76350572; 76350550; 76350309; 76350309                                                             | yes                        |
| St8sia2       | 342  | 5.74            | chr7       | 81157727  | 81158032  | 698             | < 0.001 | 81157727                                                                                                               | no                         |
| Utp18         | 342  | 5.74            | chr11      | 93748145  | 93748190  | 636             | < 0.001 | 93748145                                                                                                               | no                         |
| Hoxc9         | 343  | 5.72            | chr15      | 102807056 | 102808422 | 48              | < 0.001 | 102808579                                                                                                              | yes                        |
| Plekhl1       | 343  | 5.72            | chr7       | 39012596  | 39013276  | -133            | < 0.001 | 39013300; 39013222; 39013300                                                                                           | yes                        |
| Arid5a        | 344  | 5.71            | chr1       | 36364811  | 36364659  | 238             | < 0.001 | 36365142; 36365142                                                                                                     | yes                        |
| Ddx6          | 345  | 5.7             | chr9       | 44413288  | 44413449  | 336             | < 0.001 | 44413383; 44413383                                                                                                     | yes                        |
| Klf13         | 345  | 5.7             | chr7       | 71081546  | 71082367  | 1405            | < 0.001 | 71082403; 71081723                                                                                                     | yes                        |
| Mtap1b        | 345  | 5.7             | chr13      | 100285079 | 100286304 | 459             | < 0.001 | 100285958; 100285958                                                                                                   | yes                        |
| Add3          | 345  | 5.7             | chr19      | 53216125  | 53216585  | -1924           | < 0.001 | 53216173                                                                                                               | no                         |
| Ppt2          | 345  | 5.7             | chr17      | 34763379  | 34763616  | 448             | < 0.001 | 34764390, 34764387, 34764384, 34764389, 34764391, 34764386, 34764388, 34764393, 34763691, 34763842                     | no                         |
| Usp11         | 346  | 5.69            | chr5       | 149996527 | 149996575 | 416             | < 0.001 | 149996527                                                                                                              | no                         |
| Galnt1        | 347  | 5.68            | chr18      | 24364086  | 24364131  | 167             | < 0.001 | 24364366; 24364406                                                                                                     | yes                        |
| Nans          | 347  | 5.68            | chr4       | 46502184  | 46502332  | 110             | < 0.001 | 46502184                                                                                                               | no                         |
| Xylt1         | 348  | 5.66            | chr7       | 124523655 | 124524046 | -680            | < 0.001 | N/A                                                                                                                    | no                         |
| Bcar3         | 349  | 5.65            | chr3       | 122122542 | 122123574 | -30             | < 0.001 | 122123485; 122122975                                                                                                   | yes                        |
| Vamp4         | 349  | 5.65            | chr1       | 164501103 | 164501262 | 168             | < 0.001 | 164501194; 164501281                                                                                                   | yes                        |
| Mpp3          | 349  | 5.65            | chr11      | 101888193 | 101889124 | -345            | < 0.001 | 101888508; 101888744; 101888453; 101888452                                                                             | yes                        |
| Rod1          | 350  | 5.64            | chr4       | 59561478  | 59562167  | 2               | < 0.001 | 59561901; 59561904; 59562114                                                                                           | yes                        |
| Samd4         | 350  | 5.64            | chr14      | 47502240  | 47502814  | -35             | < 0.001 | 47502721                                                                                                               | yes                        |
| Zbtb7a        | 350  | 5.64            | chr10      | 80601321  | 80601596  | 2329            | < 0.001 | 80601406                                                                                                               | yes                        |

**Supplemental Table 4. Summary Statistics of WT1 ChIP-chip Peaks and Motif Discovery.**

| Gene               | Rank | Fold-Enrichment | Chromosome | Start     | End       | Distance to TSS | P-Value | Location of WT1 Matrix/Consensus Site                 | WT1 Consensus Site Present |
|--------------------|------|-----------------|------------|-----------|-----------|-----------------|---------|-------------------------------------------------------|----------------------------|
| Atbf1              | 351  | 5.63            | chr8       | 111239108 | 111239153 | 587             | < 0.001 | 111239445                                             | yes                        |
| Atxn2              | 351  | 5.63            | chr5       | 122162420 | 122163177 | 1537            | < 0.001 | 122162543                                             | yes                        |
| Dnajc17            | 352  | 5.62            | chr2       | 119034386 | 119034433 | 100             | < 0.001 | 119034754                                             | yes                        |
| Clec11a            | 353  | 5.61            | chr7       | 51566577  | 51567261  | -4860           | < 0.001 | 51566847                                              | yes                        |
| Rbm39              | 353  | 5.61            | chr2       | 156005989 | 156006398 | -224            | < 0.001 | 156006324                                             | yes                        |
| Cbfb               | 353  | 5.61            | chr8       | 107694896 | 107695052 | 345             | < 0.001 | 107694896                                             | no                         |
| Cacna1h            | 354  | 5.6             | chr17      | 25571123  | 25571540  | -803            | < 0.001 | 25571481; 25571292; 25571386                          | yes                        |
| Tnpo2              | 354  | 5.6             | chr8       | 87561241  | 87561522  | 200             | < 0.001 | 87561455                                              | no                         |
| Ctdspl2            | 355  | 5.59            | chr2       | 121782179 | 121782373 | 161             | < 0.001 | 121782137, 121781802, 121781787, 121782072            | no                         |
| Socs7              | 356  | 5.58            | chr11      | 97224166  | 97224491  | 474             | < 0.001 | 97224197; 97224197                                    | yes                        |
| Ly6h               | 356  | 5.58            | chr15      | 75397399  | 75397741  | -176            | < 0.001 | 75397727                                              | yes                        |
| OTTMUSG00000003802 | 357  | 5.57            | chr11      | 117344083 | 117344611 | -1357           | < 0.001 | 117344702; 117344702                                  | yes                        |
| Foxo3a             | 358  | 5.53            | chr10      | 41997198  | 41996010  | 560             | < 0.001 | 41997543; 41997782; 41997985                          | yes                        |
| Lrfn4              | 358  | 5.53            | chr19      | 4615491   | 4615695   | -170            | < 0.001 | 4615295, 4615573                                      | no                         |
| Ubtf               | 358  | 5.53            | chr11      | 102178323 | 102178950 | -201            | < 0.001 | 102178828; 102178765; 102178347; 102178442; 102178441 | yes                        |
| Pcgf2              | 359  | 5.51            | chr11      | 97560233  | 97560593  | 1090            | < 0.001 | 97560501, 97560435, 97560444, 97560203                | no                         |
| Fbxo3              | 360  | 5.5             | chr2       | 103867763 | 103867959 | -163            | < 0.001 | 103868054                                             | yes                        |
| Rcsd1              | 360  | 5.5             | chr1       | 167639122 | 167638945 | -121            | < 0.001 | 167640458                                             | yes                        |
| Nes                | 360  | 5.5             | chr3       | 87775824  | 87776743  | 1388            | < 0.001 | 87775925, 87776369, 87775614                          | no                         |
| Pten               | 360  | 5.5             | chr19      | 32830437  | 32830640  | -1603           | < 0.001 | 32830491                                              | no                         |
| Poln               | 361  | 5.49            | chr5       | 34512280  | 34512448  | -206            | < 0.001 | 34512542; 34512545                                    | yes                        |
| Kcnc2              | 361  | 5.49            | chr10      | 111708034 | 111708550 | 52              | < 0.001 | 111708184                                             | no                         |
| Ccdc131            | 361  | 5.49            | chr10      | 114822665 | 114822522 | 304             | < 0.001 | 114822738; 114822738                                  | yes                        |
| Irs1               | 362  | 5.47            | chr1       | 82287014  | 82287407  | 521             | < 0.001 | 82288546, 82288538, 82287592                          | no                         |
| Plxna2             | 363  | 5.45            | chr1       | 196446081 | 196446000 | -46             | < 0.001 | 196446264; 196446264                                  | yes                        |
| Pura               | 363  | 5.45            | chr18      | 36440738  | 36441247  | 93              | < 0.001 | 36441820; 36441017; 36441785; 36441784                | yes                        |
| Tuba2              | 364  | 5.44            | chr15      | 98764377  | 98764619  | 225             | < 0.001 | 98764633                                              | yes                        |
| Gm879              | 364  | 5.44            | chr11      | 66340476  | 66340663  | -874            | < 0.001 | 66341056                                              | yes                        |
| Chd4               | 365  | 5.43            | chr6       | 125046851 | 125048166 | 694             | < 0.001 | 125047291                                             | yes                        |
| Atp5g1             | 365  | 5.43            | chr11      | 95937177  | 95937224  | -237            | < 0.001 | 95937177                                              | no                         |
| Calcoo1            | 365  | 5.43            | chr15      | 102552188 | 102552634 | 135             | < 0.001 | 102552430, 102552325                                  | no                         |
| AI839735           | 365  | 5.43            | chr12      | 113748938 | 113749784 | 137             | < 0.001 | 113749567                                             | yes                        |
| Prpf40b            | 365  | 5.43            | chr15      | 99125814  | 99126085  | 223             | < 0.001 | N/A                                                   | no                         |
| Cox5a              | 366  | 5.42            | chr9       | 57368764  | 57368824  | -244            | < 0.001 | 57369062; 57369062                                    | yes                        |
| Pou4f1             | 366  | 5.42            | chr14      | 104866936 | 104867347 | 255             | < 0.001 | 104866969                                             | yes                        |
| Zhx2               | 366  | 5.42            | chr15      | 57526891  | 57527793  | 1359            | < 0.001 | 57527337                                              | yes                        |
| 6330442E10Rik      | 366  | 5.42            | chr12      | 80107575  | 80107827  | 460             | < 0.001 | 80107710                                              | no                         |
| Tdrkh              | 366  | 5.42            | chr3       | 94217113  | 94217366  | 105             | < 0.001 | 94217358; 94217301                                    | yes                        |
| Sertad4            | 367  | 5.41            | chr1       | 194681433 | 194681218 | 459             | < 0.001 | 194681700                                             | yes                        |
| Diap2              | 367  | 5.41            | chrX       | 126284616 | 126284864 | 308             | < 0.001 | 126285051                                             | yes                        |
| Mapk12             | 367  | 5.41            | chr15      | 88971258  | 88971515  | -240            | < 0.001 | 88971077                                              | no                         |
| Rcn1               | 367  | 5.41            | chr2       | 105239774 | 105239829 | -326            | < 0.001 | 105239774                                             | no                         |
| Atp11c             | 368  | 5.4             | chrX       | 57656967  | 57657012  | 166             | < 0.001 | 57657381; 57657061                                    | yes                        |
| Elk3               | 368  | 5.4             | chr10      | 92772938  | 92773360  | 706             | < 0.001 | 92773847                                              | yes                        |
| Cpd                | 369  | 5.39            | chr11      | 76663149  | 76663313  | -2780           | < 0.001 | 76663149                                              | no                         |
| Nope               | 369  | 5.39            | chr9       | 64949985  | 64950464  | 907             | < 0.001 | 64950172                                              | no                         |
| Ppp1r3b            | 370  | 5.38            | chr8       | 36439072  | 36439753  | 450             | < 0.001 | 36439258                                              | yes                        |
| Myo1c              | 370  | 5.38            | chr11      | 75465154  | 75465200  | -474            | < 0.001 | 75465154                                              | no                         |
| Rfc5               | 370  | 5.38            | chr5       | 117838227 | 117838761 | 296             | < 0.001 | 117838823                                             | yes                        |
| Trim33             | 370  | 5.38            | chr3       | 103084601 | 103084775 | 1530            | < 0.001 | N/A                                                   | no                         |
| Nfia               | 371  | 5.37            | chr4       | 97441627  | 97442042  | -2304           | < 0.001 | 97442061; 97441743; 97441746                          | yes                        |
| Ppp1r9a            | 372  | 5.36            | chr6       | 4853505   | 4854104   | 321             | < 0.001 | 4854173; 4854167                                      | yes                        |
| Ube2v1             | 372  | 5.36            | chr2       | 167457750 | 167458058 | -267            | < 0.001 | 167457876                                             | yes                        |
| I300014I06Rik      | 373  | 5.35            | chr13      | 34744399  | 34745414  | -603            | < 0.001 | 34744340                                              | no                         |
| Anp32a             | 373  | 5.35            | chr9       | 62189900  | 62191433  | 2261            | < 0.001 | 62189851, 62189845                                    | no                         |
| Kif1a              | 373  | 5.35            | chr1       | 94997478  | 94997525  | 940             | < 0.001 | 94997321                                              | no                         |

**Supplemental Table 4. Summary Statistics of WT1 ChIP-chip Peaks and Motif Discovery.**

| Gene          | Rank | Fold-Enrichment | Chromosome | Start     | End       | Distance to TSS | P-Value | Location of WT1 Matrix/Consensus Site            | WT1 Consensus Site Present |
|---------------|------|-----------------|------------|-----------|-----------|-----------------|---------|--------------------------------------------------|----------------------------|
| Mpp2          | 373  | 5.35            | chr11      | 101948727 | 101948884 | 954             | < 0.001 | 101948777, 101948769                             | no                         |
| Zfp36         | 374  | 5.34            | chr7       | 29166666  | 29166726  | -2449           | < 0.001 | 29166826                                         | yes                        |
| 2010305A19Rik | 374  | 5.34            | chr4       | 108000478 | 108000670 | -108            | < 0.001 | 108000609                                        | no                         |
| Wdr26         | 374  | 5.34            | chr1       | 183141201 | 183140911 | 460             | < 0.001 | 183141081, 183141075                             | no                         |
| Axin2         | 375  | 5.32            | chr11      | 108781745 | 108782774 | 350             | < 0.001 | 108782557; 108782556; 108782551; 108782550       | yes                        |
| Fads1         | 375  | 5.32            | chr19      | 10257651  | 10258275  | 476             | < 0.001 | 10258018                                         | no                         |
| Lrch1         | 376  | 5.31            | chr14      | 75346241  | 75346547  | 1284            | < 0.001 | 75346433; 75346451; 75346450                     | yes                        |
| Ntf3          | 376  | 5.31            | chr6       | 126116645 | 126117294 | -2024           | < 0.001 | 126114650, 126114694                             | no                         |
| Mgea5         | 377  | 5.3             | chr19      | 45857854  | 45858270  | -329            | < 0.001 | 45858277                                         | yes                        |
| Slc30a3       | 377  | 5.3             | chr5       | 31395268  | 31395598  | 295             | < 0.001 | 31395979; 31396328; 31396328; 31395600; 31395600 | yes                        |
| Dusp2         | 378  | 5.29            | chr2       | 127161409 | 127161987 | 70              | < 0.001 | 127161996                                        | yes                        |
| Mpp5          | 378  | 5.29            | chr12      | 79849857  | 79850008  | -23             | < 0.001 | 79849936, 79849774, 79849863, 79849840, 79849687 | no                         |
| Ints6         | 379  | 5.28            | chr14      | 63378815  | 63379656  | 907             | < 0.001 | 63378985; 63379118                               | yes                        |
| Tyro3         | 379  | 5.28            | chr2       | 119625325 | 119625935 | 521             | < 0.001 | 119625413; 119625661; 119625660                  | yes                        |
| Hoxb6         | 379  | 5.28            | chr11      | 96161421  | 96161907  | 1400            | < 0.001 | 96161824                                         | no                         |
| Kctd11        | 379  | 5.28            | chr11      | 69694712  | 69694984  | -249            | < 0.001 | 69694634, 69694539, 69694808, 69694677           | no                         |
| Gkap1         | 380  | 5.27            | chr13      | 58375084  | 58375316  | 443             | < 0.001 | 58375491                                         | yes                        |
| Sertad1       | 381  | 5.26            | chr7       | 28272063  | 28272858  | 642             | < 0.001 | 28272520; 28272479; 28272550; 28272549           | yes                        |
| Hpcal4        | 381  | 5.26            | chr4       | 122859739 | 122860478 | -705            | < 0.001 | 122859881; 122859880                             | yes                        |
| Igf2bp3       | 381  | 5.26            | chr6       | 49165518  | 49165881  | -1025           | < 0.001 | 49165683; 49165682                               | yes                        |
| Pou2f2        | 381  | 5.26            | chr7       | 25918281  | 25918686  | -965            | < 0.001 | 25918591                                         | yes                        |
| Cacna2d1      | 381  | 5.26            | chr5       | 15439997  | 15440330  | -346            | < 0.001 | 15439997                                         | no                         |
| Hnrp1         | 381  | 5.26            | chr7       | 29593539  | 29593872  | -2204           | < 0.001 | 29593539                                         | no                         |
| Rheb          | 382  | 5.25            | chr5       | 24348289  | 24348721  | -353            | < 0.001 | 24348904; 24348531; 24349269                     | yes                        |
| D10Erd438e    | 382  | 5.25            | chr10      | 52137141  | 52137081  | -241            | < 0.001 | 52137141                                         | no                         |
| Wwtr1         | 382  | 5.25            | chr3       | 57380244  | 57380544  | -594            | < 0.001 | 57379870, 57379745, 57379847                     | no                         |
| Tlx3          | 382  | 5.25            | chr11      | 33102179  | 33102095  | 1257            | < 0.001 | N/A                                              | no                         |
| BC005624      | 383  | 5.24            | chr2       | 30837543  | 30837588  | -160            | < 0.001 | 30837979; 30837684; 30837683                     | yes                        |
| Smpd3         | 383  | 5.24            | chr8       | 108861929 | 108862287 | -215            | < 0.001 | 108862330; 108862330                             | yes                        |
| Ppargc1b      | 384  | 5.23            | chr18      | 61558576  | 61558621  | 1487            | < 0.001 | 61560380; 61560380                               | yes                        |
| Ppp2r2c       | 384  | 5.23            | chr5       | 37260106  | 37260563  | 321             | < 0.001 | 37260106                                         | no                         |
| Egr1          | 385  | 5.22            | chr18      | 35020016  | 35020422  | -628            | < 0.001 | 35020459                                         | yes                        |
| Gabrb3        | 385  | 5.22            | chr7       | 64846708  | 64847207  | 324             | < 0.001 | 64847212; 64846730; 64846729                     | yes                        |
| Pias4         | 385  | 5.22            | chr10      | 80630047  | 80630403  | 253             | < 0.001 | 80630047                                         | no                         |
| Etv6          | 386  | 5.21            | chr6       | 133985469 | 133986127 | 377             | < 0.001 | 133986129; 133985764; 133986123                  | yes                        |
| Zdhhc2        | 386  | 5.21            | chr8       | 41508575  | 41509176  | -270            | < 0.001 | 41509322; 41509322                               | yes                        |
| Arid3b        | 386  | 5.21            | chr9       | 57683934  | 57684101  | -1923           | < 0.001 | 57683934                                         | no                         |
| Dido1         | 386  | 5.21            | chr2       | 180444403 | 180444638 | -7621           | < 0.001 | N/A                                              | no                         |
| Epb4.114a     | 387  | 5.2             | chr18      | 34165806  | 34166361  | 738             | < 0.001 | 34166468; 34166468                               | yes                        |
| Sf3b3         | 387  | 5.2             | chr8       | 113369864 | 113370397 | 631             | < 0.001 | 113370201                                        | yes                        |
| BC013481      | 387  | 5.2             | chr5       | 66542255  | 66542793  | -116            | < 0.001 | 66542670                                         | no                         |
| Sulf2         | 387  | 5.2             | chr2       | 165980866 | 165981075 | 262             | < 0.001 | 165981049, 165980692                             | no                         |
| Pde3b         | 388  | 5.18            | chr7       | 121558833 | 121559020 | 89              | < 0.001 | 121558912; 121558912                             | yes                        |
| Mobk1b        | 388  | 5.18            | chr6       | 83276116  | 83276267  | 106             | < 0.001 | 83276192, 83275720                               | no                         |
| Icosl         | 389  | 5.17            | chr10      | 77532388  | 77532646  | 176             | < 0.001 | 77532817                                         | yes                        |
| Daam2         | 389  | 5.17            | chr17      | 49702626  | 49703051  | 739             | < 0.001 | 49702609                                         | no                         |
| Tmem11        | 389  | 5.17            | chr11      | 60691957  | 60691884  | 554             | < 0.001 | 60692094, 60692008, 60692223, 60692082           | no                         |
| Zmym2         | 389  | 5.17            | chr14      | 57506275  | 57506320  | -332            | < 0.001 | 57506473                                         | no                         |
| Odz4          | 390  | 5.15            | chr7       | 103361142 | 103361202 | 2026            | < 0.001 | N/A                                              | no                         |
| Eef2k         | 391  | 5.14            | chr7       | 127986710 | 127987359 | 778             | < 0.001 | 127987235; 127987235                             | yes                        |
| Jup           | 391  | 5.14            | chr11      | 100256776 | 100257104 | 2252            | < 0.001 | 100256949                                        | yes                        |
| I500003O03Rik | 391  | 5.14            | chr2       | 119373457 | 119374014 | 368             | < 0.001 | 119373431                                        | no                         |
| Wbser17       | 391  | 5.14            | chr5       | 131783249 | 131783415 | 0               | < 0.001 | N/A                                              | no                         |

**Supplemental Table 4. Summary Statistics of WT1 ChIP-chip Peaks and Motif Discovery.**

| Gene          | Rank | Fold-Enrichment | Chromosome | Start     | End       | Distance to TSS | P-Value | Location of WT1 Matrix/Consensus Site                                          | WT1 Consensus Site Present |
|---------------|------|-----------------|------------|-----------|-----------|-----------------|---------|--------------------------------------------------------------------------------|----------------------------|
| Cdh24         | 392  | 5.13            | chr14      | 55260165  | 55260523  | -229            | < 0.001 | 55260496; 55260499; 55260615                                                   | yes                        |
| Chic2         | 392  | 5.13            | chr5       | 75443087  | 75443278  | -2597           | < 0.001 | 75443226                                                                       | yes                        |
| Gpd2          | 392  | 5.13            | chr2       | 57090393  | 57090708  | -159            | < 0.001 | 57090969; 57090553; 57090553                                                   | yes                        |
| Plcb3         | 392  | 5.13            | chr19      | 7043747   | 7044203   | 252             | < 0.001 | 7044032                                                                        | yes                        |
| Mmd           | 392  | 5.13            | chr11      | 90111015  | 90111366  | 249             | < 0.001 | 90111015                                                                       | no                         |
| 4930402H24Rik | 393  | 5.12            | chr2       | 130665974 | 130666183 | -150            | < 0.001 | 130666731; 130666731; 130666800                                                | yes                        |
| Bmper         | 393  | 5.12            | chr9       | 23027603  | 23027893  | 351             | < 0.001 | 23027446; 23027770; 23027452                                                   | no                         |
| Coro1b        | 393  | 5.12            | chr19      | 4150908   | 4151239   | 2408            | < 0.001 | 4150908                                                                        | no                         |
| Arhgef10      | 393  | 5.12            | chr8       | 14911602  | 14911647  | -92             | < 0.001 | N/A                                                                            | no                         |
| Pdlim7        | 394  | 5.11            | chr13      | 55614169  | 55614732  | 435             | < 0.001 | 55614789; 55614789                                                             | yes                        |
| Tanc1         | 394  | 5.11            | chr2       | 59451322  | 59451561  | 1436            | < 0.001 | 59451322                                                                       | no                         |
| Tnfrsf12a     | 394  | 5.11            | chr17      | 23813504  | 23814391  | 260             | < 0.001 | 23813795; 23813468                                                             | no                         |
| Prkar1a       | 395  | 5.1             | chr11      | 109512375 | 109513396 | 304             | < 0.001 | 109512888; 109512891; 109512885; 109512884                                     | yes                        |
| Rab10         | 395  | 5.1             | chr12      | 3310084   | 3310486   | -173            | < 0.001 | 3310331; 3310246; 3310246                                                      | yes                        |
| Vldlr         | 395  | 5.1             | chr19      | 27291700  | 27292079  | 3               | < 0.001 | 27292055; 27291848                                                             | yes                        |
| 2700049P18Rik | 395  | 5.1             | chr1       | 133422324 | 133421940 | 1774            | < 0.001 | 133421781; 133421802; 133421951                                                | no                         |
| Srf           | 395  | 5.1             | chr17      | 46691961  | 46692222  | 1127            | < 0.001 | 46692143                                                                       | no                         |
| Foxf1a        | 395  | 5.1             | chr8       | 123607850 | 123608553 | -375            | < 0.001 | 123608220; 123608348                                                           | yes                        |
| Kremen2       | 396  | 5.09            | chr17      | 23882279  | 23882719  | 248             | < 0.001 | 23882638; 23882638                                                             | yes                        |
| Eif5a         | 396  | 5.09            | chr11      | 69734598  | 69735016  | -3              | < 0.001 | 69734741; 69734738; 69734585; 69734765; 69734747; 69734750; 69734744; 69734875 | no                         |
| Lpp           | 397  | 5.08            | chr16      | 24394018  | 24394634  | 607             | < 0.001 | 24394036; 24394098                                                             | no                         |
| Mbnl3         | 398  | 5.07            | chrX       | 48558593  | 48559102  | 235             | < 0.001 | 48559125                                                                       | yes                        |
| Inhbb         | 398  | 5.07            | chr1       | 121318885 | 121318133 | 537             | < 0.001 | 121319306; 121319524; 121319524                                                | yes                        |
| Relb          | 398  | 5.07            | chr7       | 20214601  | 20215151  | -69             | < 0.001 | 20214985; 20214985                                                             | yes                        |
| D0H4S114      | 399  | 5.06            | chr18      | 33623472  | 33623890  | -11             | < 0.001 | 33624498; 33624498; 33623631; 33623631                                         | yes                        |
| Igf2          | 399  | 5.06            | chr7       | 149844045 | 149845885 | -1288           | < 0.001 | 149845527; 149845720                                                           | yes                        |
| Pdgfc         | 399  | 5.06            | chr3       | 80840715  | 80841681  | 875             | < 0.001 | 80841235                                                                       | yes                        |
| Trps1         | 399  | 5.06            | chr15      | 50720784  | 50720954  | 655             | < 0.001 | N/A                                                                            | no                         |
| Ypel4         | 399  | 5.06            | chr2       | 84582715  | 84582760  | 8378            | < 0.001 | N/A                                                                            | no                         |
| Stk39         | 400  | 5.05            | chr2       | 68309161  | 68310554  | 504             | < 0.001 | 68309469; 68309494; 68310332; 68310332; 68310533                               | yes                        |
| Tmem19        | 400  | 5.05            | chr10      | 114799442 | 114799120 | 14              | < 0.001 | 114800063; 114800066                                                           | yes                        |
| 2810006K23Rik | 400  | 5.05            | chr5       | 124778046 | 124778091 | -29             | < 0.001 | 124778136; 124778013                                                           | no                         |
| Wipf2         | 400  | 5.05            | chr11      | 98725425  | 98725591  | 444             | < 0.001 | 98725264; 98725266; 98725315; 98725342                                         | no                         |
| Msh6          | 401  | 5.04            | chr17      | 88374662  | 88374825  | 261             | < 0.001 | 88374918; 88374917                                                             | yes                        |
| Ppp2r1a       | 401  | 5.04            | chr17      | 21082517  | 21082721  | 123             | < 0.001 | 21082517                                                                       | no                         |
| Rspo1         | 401  | 5.04            | chr4       | 124662308 | 124663155 | -883            | < 0.001 | 124662219                                                                      | no                         |
| E230022H04Rik | 402  | 5.02            | chr18      | 31920138  | 31920183  | 627             | < 0.001 | 31920425                                                                       | yes                        |
| Rgag4         | 402  | 5.02            | chrX       | 99265848  | 99266418  | 770             | < 0.001 | 99266489                                                                       | yes                        |
| Lrrc3         | 402  | 5.02            | chr10      | 77365418  | 77365728  | -159            | < 0.001 | 77365500; 77365278                                                             | no                         |
| Pjal          | 403  | 4.99            | chrX       | 96665570  | 96665989  | 108             | < 0.001 | N/A                                                                            | no                         |
| Zfp3611       | 404  | 4.98            | chr12      | 81214980  | 81216163  | -1322           | < 0.001 | 81216078                                                                       | yes                        |
| 2900073G15Rik | 404  | 4.98            | chr17      | 71351873  | 71352192  | -291            | < 0.001 | 71352040; 71352103                                                             | yes                        |
| Aebp1         | 404  | 4.98            | chr11      | 5761539   | 5761330   | -88             | < 0.001 | 5761539                                                                        | no                         |
| Padi2         | 404  | 4.98            | chr4       | 140462651 | 140462923 | 402             | < 0.001 | 140462651                                                                      | no                         |
| Wdr23         | 404  | 4.98            | chr14      | 56179566  | 56179791  | 722             | < 0.001 | 56179668                                                                       | no                         |
| Wwc2          | 405  | 4.97            | chr8       | 49076064  | 49076419  | -317            | < 0.001 | 49076249                                                                       | yes                        |
| Tmc6          | 406  | 4.96            | chr11      | 117640684 | 117640983 | 1090            | < 0.001 | N/A                                                                            | no                         |
| 9130227C08Rik | 407  | 4.95            | chr14      | 56503797  | 56504117  | 15              | < 0.001 | 56503960; 56504125; 56503960; 56504128                                         | yes                        |
| Tefe3         | 407  | 4.95            | chrX       | 7340437   | 7340991   | 1068            | < 0.001 | N/A                                                                            | no                         |
| Tle1          | 407  | 4.95            | chr4       | 71861536  | 71861765  | 395             | < 0.001 | N/A                                                                            | no                         |
| Leprel2       | 408  | 4.93            | chr6       | 124806558 | 124807411 | 629             | < 0.001 | 124806655                                                                      | yes                        |
| Dctn6         | 408  | 4.93            | chr8       | 35171140  | 35171417  | 103             | < 0.001 | 35171346                                                                       | no                         |

**Supplemental Table 4. Summary Statistics of WT1 ChIP-chip Peaks and Motif Discovery.**

| Gene          | Rank | Fold-Enrichment | Chromosome | Start     | End       | Distance to TSS | P-Value | Location of WT1 Matrix/Consensus Site                                                                                                                                                        | WT1 Consensus Site Present |
|---------------|------|-----------------|------------|-----------|-----------|-----------------|---------|----------------------------------------------------------------------------------------------------------------------------------------------------------------------------------------------|----------------------------|
| Midn          | 408  | 4.93            | chr10      | 79611757  | 79611980  | 924             | < 0.001 | 79611757                                                                                                                                                                                     | no                         |
| Pf1p          | 408  | 4.93            | chr13      | 6647781   | 6647942   | 51              | < 0.001 | 6647755                                                                                                                                                                                      | no                         |
| Fgfr3         | 409  | 4.92            | chr5       | 34064468  | 34064972  | 236             | < 0.001 | 34064509                                                                                                                                                                                     | yes                        |
| Ppp1r9b       | 409  | 4.92            | chr11      | 94853879  | 94854310  | 1629            | < 0.001 | 94854205; 94854205                                                                                                                                                                           | yes                        |
| Dusp6         | 409  | 4.92            | chr10      | 98725164  | 98725613  | -278            | < 0.001 | 98724644, 98725087, 98725092, 98724439, 98724643, 98725396, 98724430                                                                                                                         | no                         |
| Syvn1         | 409  | 4.92            | chr19      | 6046613   | 6046849   | 165             | < 0.001 | 6046613                                                                                                                                                                                      | no                         |
| Alcam         | 410  | 4.9             | chr16      | 52452310  | 52452702  | 550             | < 0.001 | 52452393                                                                                                                                                                                     | yes                        |
| Tbc1d2b       | 410  | 4.9             | chr9       | 90164939  | 90165411  | 641             | < 0.001 | 90165229                                                                                                                                                                                     | no                         |
| Hoxd11        | 410  | 4.9             | chr2       | 74519648  | 74520583  | -152            | < 0.001 | 74520044                                                                                                                                                                                     | yes                        |
| Ptn           | 411  | 4.89            | chr6       | 36760031  | 36760353  | 1035            | < 0.001 | 36759990, 36759943, 36760217                                                                                                                                                                 | no                         |
| Zfp148        | 411  | 4.89            | chr16      | 33381561  | 33381736  | 724             | < 0.001 | 33381561                                                                                                                                                                                     | no                         |
| Ust           | 411  | 4.89            | chr10      | 8238334   | 8238633   | 267             | < 0.001 | N/A                                                                                                                                                                                          | no                         |
| D230005D02Rik | 412  | 4.88            | chr14      | 77557088  | 77557301  | 488             | < 0.001 | 77557088                                                                                                                                                                                     | no                         |
| E130014J05Rik | 412  | 4.88            | chr3       | 133207920 | 133208200 | -588            | < 0.001 | N/A                                                                                                                                                                                          | no                         |
| Ldlrap1       | 413  | 4.87            | chr4       | 134323115 | 134323630 | 539             | < 0.001 | 134324115; 134324118                                                                                                                                                                         | yes                        |
| A630054L15Rik | 413  | 4.87            | chr14      | 27399494  | 27399677  | 601             | < 0.001 | 27399338                                                                                                                                                                                     | no                         |
| Zfyve21       | 413  | 4.87            | chr12      | 113054524 | 113054709 | 2206            | < 0.001 | 113054524                                                                                                                                                                                    | no                         |
| Pygo1         | 413  | 4.87            | chr9       | 72773727  | 72773986  | 294             | < 0.001 | N/A                                                                                                                                                                                          | no                         |
| Fjx1          | 414  | 4.86            | chr2       | 102292363 | 102292412 | -439            | < 0.001 | 102292399; 102292385                                                                                                                                                                         | yes                        |
| 2310005N03Rik | 414  | 4.86            | chr1       | 180248794 | 180248839 | -467            | < 0.001 | 180249200; 180249200                                                                                                                                                                         | yes                        |
| Hfm1          | 415  | 4.85            | chr5       | 107354836 | 107355472 | -81             | < 0.001 | 107355428                                                                                                                                                                                    | yes                        |
| Sdcbp         | 415  | 4.85            | chr4       | 6292974   | 6293391   | 348             | < 0.001 | 6293015                                                                                                                                                                                      | yes                        |
| Rps10         | 415  | 4.85            | chr17      | 27773770  | 27773820  | -1608           | < 0.001 | 27773936; 27773936                                                                                                                                                                           | yes                        |
| Crim1         | 415  | 4.85            | chr17      | 78599189  | 78601018  | -26             | < 0.001 | 78600020, 78600023, 78599366, 78600473, 78599939, 78599936, 78599297, 78599541, 78599200, 78599774, 78599880, 78599945, 78600582, 78599498, 78600088, 78600091, 78599425, 78600014, 78599642 | no                         |
| Fign          | 415  | 4.85            | chr2       | 63936624  | 63936824  | -734            | < 0.001 | 63936508                                                                                                                                                                                     | no                         |
| Phf12         | 415  | 4.85            | chr11      | 77797218  | 77797947  | 852             | < 0.001 | 77797218                                                                                                                                                                                     | no                         |
| Satb2         | 416  | 4.84            | chr1       | 57029173  | 57029053  | -852            | < 0.001 | 57030638; 57029240; 57030653; 57030653; 57029240                                                                                                                                             | yes                        |
| Trp53i11      | 416  | 4.84            | chr2       | 93027427  | 93027748  | -288            | < 0.001 | 93027882                                                                                                                                                                                     | yes                        |
| Snapc2        | 416  | 4.84            | chr8       | 4253502   | 4253661   | 535             | < 0.001 | 4253572, 4253323, 4253317, 4253436, 4253559                                                                                                                                                  | no                         |
| Zbtb7c        | 416  | 4.84            | chr18      | 75979393  | 75979716  | -409            | < 0.001 | 75979566, 75979656, 75979530                                                                                                                                                                 | no                         |
| Crk           | 417  | 4.83            | chr11      | 75493062  | 75493537  | 463             | < 0.001 | 75493466; 75493113; 75493113                                                                                                                                                                 | yes                        |
| Osbpl5        | 417  | 4.83            | chr7       | 150925452 | 150925894 | 2132            | < 0.001 | 150925837, 150924691                                                                                                                                                                         | no                         |
| Zfp143        | 417  | 4.83            | chr7       | 117204705 | 117204757 | -484            | < 0.001 | 117204881                                                                                                                                                                                    | yes                        |
| Tpd52l1       | 418  | 4.82            | chr10      | 31165205  | 31165483  | 499             | < 0.001 | 31165224; 31165589; 31165224                                                                                                                                                                 | yes                        |
| BC021881      | 418  | 4.82            | chr13      | 117814004 | 117814364 | 294             | < 0.001 | N/A                                                                                                                                                                                          | no                         |
| 1110054O05Rik | 419  | 4.81            | chr4       | 59799694  | 59799874  | -2989           | < 0.001 | 59799885                                                                                                                                                                                     | yes                        |
| Gpsm3         | 419  | 4.81            | chr17      | 34728329  | 34728513  | 1597            | < 0.001 | N/A                                                                                                                                                                                          | no                         |
| Bach2         | 420  | 4.8             | chr4       | 32325550  | 32326252  | -242            | < 0.001 | 32326064                                                                                                                                                                                     | yes                        |
| Atp2b1        | 420  | 4.8             | chr10      | 98378400  | 98378277  | 171             | < 0.001 | 98378849; 98378865; 98378489; 98378489; 98378576; 98378575                                                                                                                                   | yes                        |
| Golph2        | 420  | 4.8             | chr13      | 59776523  | 59777478  | -129            | < 0.001 | 59777186                                                                                                                                                                                     | yes                        |
| Grb14         | 420  | 4.8             | chr2       | 64860180  | 64861175  | 111             | < 0.001 | 64861077; 64861077; 64861066; 64861083; 64861083                                                                                                                                             | yes                        |
| Igfbp2        | 420  | 4.8             | chr1       | 72870420  | 72870855  | -368            | < 0.001 | 72871858, 72870318, 72870931, 72870946, 72870950, 72870891, 72870935, 72870321, 72870961, 72870963                                                                                           | no                         |
| Tusc3         | 420  | 4.8             | chr8       | 40069097  | 40069489  | 544             | < 0.001 | 40069486; 40069154; 40069153                                                                                                                                                                 | yes                        |
| 6430527G18Rik | 421  | 4.79            | chr12      | 88224806  | 88225141  | 771             | < 0.001 | 88225142; 88224957; 88224956                                                                                                                                                                 | yes                        |
| Metnl         | 421  | 4.79            | chr11      | 121563705 | 121564015 | -12             | < 0.001 | 121563852; 121563852                                                                                                                                                                         | yes                        |
| Rhobtb3       | 421  | 4.79            | chr13      | 76080946  | 76081607  | -98             | < 0.001 | 76081459; 76081387; 76081403                                                                                                                                                                 | yes                        |
| Kpna1         | 421  | 4.79            | chr16      | 35983190  | 35983468  | -228            | < 0.001 | 35983387                                                                                                                                                                                     | no                         |
| Xpo1          | 421  | 4.79            | chr11      | 23156809  | 23157077  | 1007            | < 0.001 | N/A                                                                                                                                                                                          | no                         |
| Actg1         | 422  | 4.78            | chr11      | 120211623 | 120211785 | -1964           | < 0.001 | 120212751; 120213057                                                                                                                                                                         | yes                        |

**Supplemental Table 4. Summary Statistics of WT1 ChIP-chip Peaks and Motif Discovery.**

| Gene          | Rank | Fold-Enrichment | Chromosome | Start     | End       | Distance to TSS | P-Value | Location of WT1 Matrix/Consensus Site                                | WT1 Consensus Site Present |
|---------------|------|-----------------|------------|-----------|-----------|-----------------|---------|----------------------------------------------------------------------|----------------------------|
| Gpr81         | 422  | 4.78            | chr5       | 124329917 | 124330107 | -72             | < 0.001 | 124329917                                                            | no                         |
| Laptm5        | 422  | 4.78            | chr4       | 130465053 | 130465241 | -4034           | < 0.001 | 130465053                                                            | no                         |
| Zdhhc20       | 423  | 4.77            | chr14      | 58508582  | 58508963  | 159             | < 0.001 | 58508873                                                             | yes                        |
| E330009J07Rik | 423  | 4.77            | chr6       | 40385320  | 40385873  | 784             | < 0.001 | 40385976                                                             | yes                        |
| Mapk9         | 423  | 4.77            | chr11      | 49660665  | 49661225  | 650             | < 0.001 | 49661258; 49661257                                                   | yes                        |
| Car11         | 423  | 4.77            | chr7       | 52955835  | 52956092  | 522             | < 0.001 | 52962335, 52961521, 52961434                                         | no                         |
| Mxra8         | 423  | 4.77            | chr4       | 155213761 | 155214147 | 125             | < 0.001 | 155213822, 155213930                                                 | no                         |
| Npdcl         | 424  | 4.76            | chr2       | 25258199  | 25258571  | -175            | < 0.001 | 25258747                                                             | yes                        |
| Xrn2          | 424  | 4.76            | chr2       | 146838724 | 146839192 | 119             | < 0.001 | 146839306; 146839309                                                 | yes                        |
| Ppfbp1        | 425  | 4.75            | chr6       | 146837166 | 146837211 | 153             | < 0.001 | 146837309                                                            | yes                        |
| Rtkn          | 425  | 4.75            | chr6       | 83085678  | 83085978  | -1126           | < 0.001 | 83086089                                                             | yes                        |
| Hoxd9         | 425  | 4.75            | chr2       | 74536394  | 74536995  | 981             | < 0.001 | 74536490, 74536578, 74536466, 74536251, 74536382                     | no                         |
| Six4          | 425  | 4.75            | chr12      | 74213237  | 74213712  | 972             | < 0.001 | 74213112, 74213061                                                   | no                         |
| Tmem16f       | 425  | 4.75            | chr15      | 95621053  | 95621270  | -195            | < 0.001 | 95621236, 95621215, 95621242                                         | no                         |
| Tmtc2         | 425  | 4.75            | chr10      | 105011424 | 105011585 | 359             | < 0.001 | 105011597                                                            | no                         |
| Calm1         | 426  | 4.74            | chr12      | 101438774 | 101439053 | 1046            | < 0.001 | 101438964; 101438964                                                 | yes                        |
| Ldhb          | 426  | 4.74            | chr6       | 142456328 | 142456663 | -63             | < 0.001 | 142457099                                                            | yes                        |
| Tubb5         | 426  | 4.74            | chr17      | 35974396  | 35974456  | 751             | < 0.001 | 35974438                                                             | yes                        |
| Chka          | 427  | 4.73            | chr19      | 3851424   | 3852236   | 78              | < 0.001 | 3851960                                                              | yes                        |
| Wee1          | 427  | 4.73            | chr7       | 117265588 | 117266265 | 354             | < 0.001 | 117266358; 117266103                                                 | yes                        |
| Sh3tc2        | 427  | 4.73            | chr18      | 62112255  | 62112647  | -104            | < 0.001 | 62112575                                                             | no                         |
| Ube2d3        | 427  | 4.73            | chr3       | 135101384 | 135101547 | -314            | < 0.001 | 135101450                                                            | no                         |
| Atp8b1        | 428  | 4.71            | chr18      | 64820245  | 64820915  | 122             | < 0.001 | 64820370                                                             | yes                        |
| Eed           | 428  | 4.71            | chr7       | 97128456  | 97128960  | 886             | < 0.001 | 97128651                                                             | no                         |
| Eif4ebp1      | 428  | 4.71            | chr8       | 28371727  | 28371903  | 953             | < 0.001 | 28371554                                                             | no                         |
| Pip5k2c       | 428  | 4.71            | chr10      | 126636116 | 126636005 | 12458           | < 0.001 | N/A                                                                  | no                         |
| Senn1g        | 429  | 4.7             | chr7       | 128878166 | 128878453 | 294             | < 0.001 | 128878433                                                            | yes                        |
| Zfp316        | 429  | 4.7             | chr5       | 144031254 | 144031446 | 194             | < 0.001 | 144031350; 144031445; 144031445                                      | yes                        |
| 2210010L05Rik | 429  | 4.7             | chr1       | 52783434  | 52783709  | 476             | < 0.001 | 52783522, 52783939, 52783366, 52783933, 52783790, 52783797, 52783708 | no                         |
| Hoxd10        | 429  | 4.7             | chr2       | 74525395  | 74526090  | -4194           | < 0.001 | 74525931, 74525513                                                   | no                         |
| Setd7         | 429  | 4.7             | chr3       | 51364536  | 51364968  | -21             | < 0.001 | 128878232                                                            | no                         |
| Ccdc69        | 429  | 4.7             | chr11      | 54891047  | 54891245  | 411             | < 0.001 | N/A                                                                  | no                         |
| Usp28         | 430  | 4.69            | chr9       | 48793374  | 48794080  | 399             | < 0.001 | 48793815; 48793627; 48793449; 48793449; 48793658                     | yes                        |
| Ppp2r5b       | 430  | 4.69            | chr19      | 6233771   | 6233936   | 2046            | < 0.001 | 6233771                                                              | no                         |
| Rbms3         | 430  | 4.69            | chr9       | 117162749 | 117162800 | -1177           | < 0.001 | 117162749                                                            | no                         |
| Sh3bgrl3      | 431  | 4.68            | chr4       | 133684961 | 133685134 | -317            | < 0.001 | 133684961                                                            | no                         |
| Vac14         | 431  | 4.68            | chr8       | 113142668 | 113142874 | 313             | < 0.001 | 113142706                                                            | no                         |
| Ddx11         | 431  | 4.68            | chr17      | 66473037  | 66473247  | 358             | < 0.001 | 66473251; 66473251                                                   | yes                        |
| Elf1          | 432  | 4.67            | chr14      | 79880949  | 79880994  | -28             | < 0.001 | 79880905                                                             | no                         |
| Gabra4        | 433  | 4.65            | chr5       | 72048292  | 72049893  | -128            | < 0.001 | 72048197                                                             | no                         |
| Inpp5f        | 433  | 4.65            | chr7       | 135754416 | 135754595 | -306            | < 0.001 | 135754416                                                            | no                         |
| Sncap         | 433  | 4.65            | chr18      | 52927766  | 52927928  | 426             | < 0.001 | 52927894                                                             | yes                        |
| Serinc2       | 433  | 4.65            | chr4       | 129951574 | 129951804 | 1052            | < 0.001 | N/A                                                                  | no                         |
| Usp11         | 434  | 4.64            | chrX       | 20281290  | 20281663  | 281             | < 0.001 | 20281800                                                             | yes                        |
| Scd2          | 434  | 4.64            | chr19      | 44369288  | 44369339  | 737             | < 0.001 | 44369383; 44369383                                                   | yes                        |
| Dyrk2         | 434  | 4.64            | chr10      | 118306688 | 118306740 | -755            | < 0.001 | 118306688                                                            | no                         |
| Pin1          | 435  | 4.63            | chr9       | 20456272  | 20456457  | -139            | < 0.001 | 20456633                                                             | yes                        |
| Gpr124        | 435  | 4.63            | chr8       | 28196115  | 28196276  | -174            | < 0.001 | 28195981, 28196047, 28196108                                         | no                         |
| Socs1         | 435  | 4.63            | chr16      | 10785131  | 10785901  | -89             | < 0.001 | 10785388, 10785683, 10785382                                         | no                         |
| Ddx5          | 436  | 4.62            | chr11      | 106649658 | 106649703 | 128             | < 0.001 | 106649927                                                            | yes                        |
| Mgat4b        | 436  | 4.62            | chr11      | 50038324  | 50038496  | -787            | < 0.001 | 50038383; 50038386                                                   | yes                        |
| Zfp238        | 436  | 4.62            | chr1       | 179373229 | 179372896 | -1539           | < 0.001 | 179373501                                                            | yes                        |
| Aprt          | 436  | 4.62            | chr8       | 125100387 | 125100793 | 287             | < 0.001 | 125100387                                                            | no                         |
| Hoxa10        | 436  | 4.62            | chr6       | 52184912  | 52185132  | 10              | < 0.001 | 52184769, 52184753, 52184775                                         | no                         |
| Ccn11         | 437  | 4.61            | chr3       | 65761070  | 65762137  | 819             | < 0.001 | 65761814; 65762188; 65762188; 65761604; 65761603                     | yes                        |
| Hdac2         | 437  | 4.61            | chr10      | 36695100  | 36695015  | 431             | < 0.001 | 36695414; 36695506; 36695506                                         | yes                        |
| Ptov1         | 437  | 4.61            | chr7       | 52124141  | 52124739  | 580             | < 0.001 | 52124221; 52124536                                                   | yes                        |

**Supplemental Table 4. Summary Statistics of WT1 ChIP-chip Peaks and Motif Discovery.**

| Gene                  | Rank | Fold-Enrichment | Chromosome | Start     | End       | Distance to TSS | P-Value | Location of WT1 Matrix/Consensus Site                      | WT1 Consensus Site Present |
|-----------------------|------|-----------------|------------|-----------|-----------|-----------------|---------|------------------------------------------------------------|----------------------------|
| 4933421E11Rik         | 437  | 4.61            | chr3       | 106524955 | 106525012 | 385             | < 0.001 | 106524942, 106525051                                       | no                         |
| B3gnt2                | 438  | 4.6             | chr11      | 22759831  | 22760338  | -174            | < 0.001 | 22759950; 22760186                                         | yes                        |
| Klf15                 | 438  | 4.6             | chr6       | 90412019  | 90412286  | -361            | < 0.001 | 90412019                                                   | no                         |
| Nin                   | 438  | 4.6             | chr12      | 71212459  | 71212907  | -8641           | < 0.001 | 71212835; 71212643; 71212838                               | yes                        |
| Spag8                 | 439  | 4.59            | chr4       | 43664480  | 43664525  | 1922            | < 0.001 | 43664480                                                   | no                         |
| ENSMUST0000010037.3.1 | 439  | 4.59            | chr2       | 20890076  | 20890420  | -478            | < 0.001 | 20890468; 20890467                                         | yes                        |
| Enpp1                 | 440  | 4.58            | chr10      | 24432089  | 24432016  | -85             | < 0.001 | 24432175; 24432178                                         | yes                        |
| Peaf                  | 440  | 4.58            | chr17      | 53706456  | 53706912  | 251             | < 0.001 | 53706746; 53706746; 53706897                               | yes                        |
| Galnt7                | 441  | 4.57            | chr8       | 60131634  | 60131795  | 28              | < 0.001 | 60131709                                                   | yes                        |
| Cd302                 | 441  | 4.57            | chr2       | 60121880  | 60122312  | 573             | < 0.001 | 60122461                                                   | yes                        |
| 1810030007Rik         | 441  | 4.57            | chrX       | 12250526  | 12250936  | 124             | < 0.001 | 12250837, 12250716, 12250681                               | no                         |
| Bbc3                  | 441  | 4.57            | chr7       | 16895637  | 16896014  | 1002            | < 0.001 | 16895648, 16895752, 16895620, 16895617, 16895604, 16895623 | no                         |
| Agpat3                | 442  | 4.56            | chr10      | 77815379  | 77815697  | -957            | < 0.001 | 77815380; 77815380                                         | yes                        |
| Dync1li2              | 442  | 4.56            | chr8       | 106966424 | 106966469 | 459             | < 0.001 | 106966424                                                  | no                         |
| Lrrc42                | 442  | 4.56            | chr4       | 106925356 | 106925582 | 578             | < 0.001 | 106925504                                                  | no                         |
| BC005537              | 443  | 4.55            | chr13      | 24893097  | 24893700  | 29              | < 0.001 | 24893795; 24893819; 24893818                               | yes                        |
| Gse1                  | 443  | 4.55            | chr8       | 123012258 | 123012445 | -483            | < 0.001 | 123012066                                                  | no                         |
| Nrf1                  | 443  | 4.55            | chr6       | 29998820  | 29999001  | 991             | < 0.001 | 29998703, 29998642, 29998621, 29998935                     | no                         |
| Wdtd1                 | 444  | 4.54            | chr4       | 132895180 | 132895419 | 28              | < 0.001 | 132895288                                                  | yes                        |
| Bai1                  | 444  | 4.54            | chr15      | 74346178  | 74346878  | 45              | < 0.001 | 74346905; 74346446; 74346445                               | yes                        |
| Usp5                  | 444  | 4.54            | chr6       | 124779296 | 124779341 | 147             | < 0.001 | 124779296                                                  | no                         |
| C1stn1                | 445  | 4.53            | chr4       | 148961706 | 148961926 | 1154            | < 0.001 | 148962108; 148962107                                       | yes                        |
| Siah2                 | 445  | 4.53            | chr3       | 58496413  | 58496813  | -354            | < 0.001 | 58496532; 58496532; 58496678; 58496532                     | yes                        |
| D030011010Rik         | 445  | 4.53            | chr6       | 149049572 | 149049775 | 606             | < 0.001 | 149049572                                                  | no                         |
| Ube2r2                | 445  | 4.53            | chr4       | 41083112  | 41083452  | 81              | < 0.001 | 41083355, 41083085, 41083071, 41083088, 41082965           | no                         |
| Lfng                  | 446  | 4.52            | chr5       | 141082442 | 141082654 | -663            | < 0.001 | 141082691                                                  | yes                        |
| Stau1                 | 446  | 4.52            | chr2       | 166820990 | 166821445 | 590             | < 0.001 | 166821315                                                  | no                         |
| Crsp2                 | 447  | 4.51            | chrX       | 12339112  | 12339644  | -35             | < 0.001 | 12339477                                                   | yes                        |
| Orc3l                 | 447  | 4.51            | chr4       | 34561937  | 34562092  | 233             | < 0.001 | 34561937                                                   | no                         |
| Olfrl323              | 447  | 4.51            | chrX       | 47365442  | 47365704  | -2060           | < 0.001 | N/A                                                        | no                         |
| Tpm4                  | 448  | 4.5             | chr8       | 74659216  | 74659364  | 152             | < 0.001 | 74659334                                                   | yes                        |
| Impa2                 | 448  | 4.5             | chr18      | 67449049  | 67449094  | 196             | < 0.001 | 67449418; 67449418                                         | yes                        |
| 2610027C15Rik         | 448  | 4.5             | chr4       | 125824948 | 125825193 | -276            | < 0.001 | 125825093                                                  | no                         |
| Baz2b                 | 448  | 4.5             | chr2       | 59963598  | 59963648  | 174             | < 0.001 | 59963538, 59963478, 59963486                               | no                         |
| Gas1                  | 448  | 4.5             | chr13      | 60278795  | 60278852  | -98             | < 0.001 | 60278788                                                   | no                         |
| Sod3                  | 448  | 4.5             | chr5       | 52754533  | 52755360  | -370            | < 0.001 | 52755137, 52754912                                         | no                         |
| Usp9x                 | 448  | 4.5             | chrX       | 12649526  | 12650318  | 1083            | < 0.001 | 12650481; 12650458; 12650007; 12650006                     | yes                        |
| Fusip1                | 448  | 4.5             | chr4       | 135411913 | 135412846 | 202             | < 0.001 | 135412431; 135412623                                       | yes                        |
| Anks1                 | 449  | 4.49            | chr17      | 28046337  | 28046723  | 76              | < 0.001 | 28046406                                                   | yes                        |
| Rad54l2               | 450  | 4.47            | chr9       | 106690522 | 106690861 | 998             | < 0.001 | 106690705                                                  | yes                        |
| Cdh11                 | 450  | 4.47            | chr8       | 105309277 | 105309691 | -489            | < 0.001 | 105309162                                                  | no                         |
| Itga5                 | 450  | 4.47            | chr15      | 103196073 | 103196778 | 704             | < 0.001 | 103196375, 103195967                                       | no                         |
| Kcns3                 | 450  | 4.47            | chr12      | 11157270  | 11157846  | -351            | < 0.001 | 11157463, 11157085, 11157079                               | no                         |
| Rmnd1                 | 450  | 4.47            | chr10      | 5916639   | 5916878   | 2460            | < 0.001 | 5916730                                                    | no                         |
| Kcns2                 | 451  | 4.46            | chr15      | 34767119  | 34767825  | 7               | < 0.001 | 34767467                                                   | yes                        |
| Ras110b               | 451  | 4.46            | chr11      | 83223001  | 83223225  | -549            | < 0.001 | 83223149, 83223042, 83223158, 83223049                     | no                         |
| Egff9                 | 451  | 4.46            | chr17      | 46434422  | 46434467  | 75              | < 0.001 | N/A                                                        | no                         |
| Fbxo32                | 452  | 4.45            | chr15      | 58046562  | 58046916  | -345            | < 0.001 | 58046483, 58046485, 58046477, 58046482                     | no                         |
| Lcorl                 | 452  | 4.45            | chr5       | 46247624  | 46247838  | 144             | < 0.001 | 46247624                                                   | no                         |
| Prr15                 | 452  | 4.45            | chr6       | 54277297  | 54277992  | 505             | < 0.001 | 54277864, 54277229                                         | no                         |
| BC057022              | 453  | 4.44            | chr5       | 115021439 | 115021484 | 3203            | < 0.001 | 115021825                                                  | yes                        |
| Cltc                  | 453  | 4.44            | chr11      | 86571183  | 86571860  | -560            | < 0.001 | 86571797                                                   | yes                        |
| Hoxa4                 | 453  | 4.44            | chr6       | 52140959  | 52141019  | 713             | < 0.001 | 52141133, 52141131, 52141115                               | no                         |
| Plekha2               | 453  | 4.44            | chr8       | 26212043  | 26212088  | 138             | < 0.001 | 26212256                                                   | no                         |
| Lrp8                  | 453  | 4.44            | chr4       | 107474320 | 107474547 | -517            | < 0.001 | N/A                                                        | no                         |
| Thns12                | 453  | 4.44            | chr6       | 71093909  | 71094057  | 437             | < 0.001 | N/A                                                        | no                         |

**Supplemental Table 4. Summary Statistics of WT1 ChIP-chip Peaks and Motif Discovery.**

| Gene          | Rank | Fold-Enrichment | Chromosome | Start     | End       | Distance to TSS | P-Value | Location of WT1 Matrix/Consensus Site  | WT1 Consensus Site Present |
|---------------|------|-----------------|------------|-----------|-----------|-----------------|---------|----------------------------------------|----------------------------|
| Gnai1         | 454  | 4.43            | chr5       | 17866634  | 17866916  | -430            | < 0.001 | 17866682; 17866682                     | yes                        |
| AW548124      | 454  | 4.43            | chr17      | 83613490  | 83614123  | -644            | < 0.001 | 83613586                               | no                         |
| Car15         | 454  | 4.43            | chr16      | 17835728  | 17836105  | 2389            | < 0.001 | 17835728                               | no                         |
| Man1a         | 454  | 4.43            | chr10      | 53796079  | 53796318  | -504            | < 0.001 | 53796227                               | no                         |
| Mtss1         | 454  | 4.43            | chr15      | 58912323  | 58912527  | 1046            | < 0.001 | 58912428                               | no                         |
| Wdr1          | 454  | 4.43            | chr5       | 38952316  | 38952472  | 492             | < 0.001 | 38952226                               | no                         |
| Hmga2         | 454  | 4.43            | chr10      | 119911676 | 119911836 | 2293            | < 0.001 | 119911802                              | yes                        |
| Slc6a9        | 455  | 4.42            | chr4       | 117507699 | 117508024 | 13              | < 0.001 | 117508003                              | yes                        |
| Rrad          | 455  | 4.42            | chr8       | 107154872 | 107155237 | 325             | < 0.001 | 107154872                              | no                         |
| Arid1a        | 455  | 4.42            | chr4       | 133313088 | 133313593 | -3590           | < 0.001 | N/A                                    | no                         |
| Cys1          | 455  | 4.42            | chr12      | 25365988  | 25366336  | 349             | < 0.001 | N/A                                    | no                         |
| Cd24a         | 456  | 4.41            | chr10      | 43298507  | 43299162  | 166             | < 0.001 | 43299079; 43299023; 43299395; 43299395 | yes                        |
| Slc2a12       | 456  | 4.41            | chr10      | 22364807  | 22365200  | 242             | < 0.001 | 22365400                               | yes                        |
| Epn3          | 456  | 4.41            | chr11      | 94360501  | 94361087  | 485             | < 0.001 | 94360319; 94360324; 94361026; 94360330 | no                         |
| Scamp1        | 456  | 4.41            | chr13      | 95055651  | 95055704  | -442            | < 0.001 | 95055651                               | no                         |
| Runx1         | 457  | 4.4             | chr16      | 92697152  | 92697330  | 399             | < 0.001 | 92697394; 92697394                     | yes                        |
| 2310016M24Rik | 457  | 4.4             | chr15      | 99555501  | 99555561  | -546            | < 0.001 | 99555501                               | no                         |
| Narg1         | 457  | 4.4             | chr3       | 51220820  | 51220866  | 780             | < 0.001 | 51220820                               | no                         |
| Spsb4         | 458  | 4.39            | chr9       | 96918644  | 96919073  | -126            | < 0.001 | 96918900                               | yes                        |
| Ppp2r5e       | 458  | 4.39            | chr12      | 76696396  | 76696950  | 387             | < 0.001 | 76696572; 76696893; 76696575; 76696569 | yes                        |
| Dusp4         | 458  | 4.39            | chr8       | 35870340  | 35870515  | -171            | < 0.001 | 35870340                               | no                         |
| Ptpn5         | 459  | 4.38            | chr7       | 54387791  | 54388490  | 780             | < 0.001 | 54387980; 54388353                     | yes                        |
| Sgcb          | 459  | 4.38            | chr5       | 74042368  | 74042911  | -3614           | < 0.001 | 74042818                               | yes                        |
| Gpr126        | 460  | 4.37            | chr10      | 14264835  | 14265035  | -170            | < 0.001 | 14265165                               | yes                        |
| Mettl9        | 460  | 4.37            | chr7       | 128177892 | 128178229 | 94              | < 0.001 | 128178330; 128178333                   | yes                        |
| St6galnac5    | 460  | 4.37            | chr3       | 152644009 | 152644662 | 947             | < 0.001 | 152644267; 152644474                   | yes                        |
| Utx           | 460  | 4.37            | chrX       | 17741044  | 17741577  | 1755            | < 0.001 | 17741350; 17741330                     | no                         |
| Megf9         | 461  | 4.36            | chr4       | 70197620  | 70197929  | -1688           | < 0.001 | 70197620                               | no                         |
| Wdr46         | 461  | 4.36            | chr17      | 34078066  | 34078111  | 421             | < 0.001 | 34078066                               | no                         |
| Mical1        | 462  | 4.35            | chr10      | 41197249  | 41197180  | 1216            | < 0.001 | 41197354                               | yes                        |
| Patz1         | 462  | 4.35            | chr11      | 3192132   | 3192053   | 1564            | < 0.001 | 3192132                                | no                         |
| BC030378      | 462  | 4.35            | chr15      | 96471902  | 96472318  | -252            | < 0.001 | 96472157                               | yes                        |
| Kcnk3         | 462  | 4.35            | chr5       | 30889596  | 30889990  | -576            | < 0.001 | N/A                                    | no                         |
| Smad6         | 463  | 4.34            | chr9       | 63870056  | 63870384  | -1103           | < 0.001 | 63870022; 63870008                     | no                         |
| Edg5          | 464  | 4.33            | chr9       | 20780150  | 20780678  | 917             | < 0.001 | 20780611; 20780610                     | yes                        |
| Ankrd15       | 465  | 4.32            | chr19      | 25312676  | 25312951  | 1235            | < 0.001 | 25312676                               | no                         |
| Yrdc          | 465  | 4.32            | chr4       | 124527182 | 124527556 | -821            | < 0.001 | 124527182                              | no                         |
| Gpr45         | 466  | 4.31            | chr1       | 43010157  | 43010377  | 373             | < 0.001 | 43010862                               | yes                        |
| Ifngr1        | 466  | 4.31            | chr10      | 19311282  | 19311334  | -455            | < 0.001 | 19311669; 19311672                     | yes                        |
| Mertk         | 466  | 4.31            | chr2       | 25312676  | 128524274 | -484            | < 0.001 | 25312676                               | no                         |
| Parva         | 466  | 4.31            | chr7       | 124527182 | 119571581 | 173             | < 0.001 | 124527182                              | no                         |
| Zfp691        | 466  | 4.31            | chr4       | 25312676  | 118846562 | 165             | < 0.001 | 25312676                               | no                         |
| 1700020C11Rik | 467  | 4.3             | chr11      | 3995090   | 3995361   | 97              | < 0.001 | 3995404; 3995404                       | yes                        |
| Ttyh2         | 467  | 4.3             | chr11      | 114537181 | 114537451 | 423             | < 0.001 | 114537181                              | no                         |
| Ubr1          | 467  | 4.3             | chr2       | 120795970 | 120796254 | 219             | < 0.001 | 120795970                              | no                         |
| Spa17         | 468  | 4.29            | chr9       | 37420985  | 37421191  | 191             | < 0.001 | 37421131                               | yes                        |
| Zc3h7a        | 468  | 4.29            | chr16      | 11176059  | 11176248  | 299             | < 0.001 | 11176397                               | yes                        |
| Cacng2        | 468  | 4.29            | chr15      | 77950039  | 77950203  | -470            | < 0.001 | 77949972; 77949969; 77950005           | no                         |
| Cdh22         | 468  | 4.29            | chr2       | 165061020 | 165061440 | -1029           | < 0.001 | 165061020                              | no                         |
| Uchl3         | 468  | 4.29            | chr14      | 102052989 | 102053160 | -168            | < 0.001 | N/A                                    | no                         |
| Lrrc8b        | 469  | 4.28            | chr5       | 105844006 | 105844619 | -531            | < 0.001 | 105844006                              | no                         |
| Dnm1          | 469  | 4.28            | chr2       | 32173566  | 32174026  | 35236           | < 0.001 | N/A                                    | no                         |
| 0710008K08Rik | 470  | 4.27            | chr8       | 11497566  | 11497847  | 119             | < 0.001 | 11497817                               | yes                        |
| Fhod1         | 470  | 4.27            | chr8       | 107870866 | 107871140 | 713             | < 0.001 | 107870866                              | no                         |
| Gsto1         | 471  | 4.26            | chr19      | 47929479  | 47929653  | 24              | < 0.001 | 47929639                               | yes                        |
| Sipa1         | 471  | 4.26            | chr19      | 5663337   | 5663386   | 258             | < 0.001 | 5663337                                | no                         |
| D15Mgi27      | 471  | 4.26            | chr15      | 102100868 | 102101071 | -8838           | < 0.001 | 102101133; 102101136                   | yes                        |
| D1Erd622e     | 472  | 4.25            | chr1       | 99558143  | 99558073  | 136             | < 0.001 | 99558486                               | yes                        |
| Tmem106c      | 473  | 4.24            | chr15      | 97794876  | 97795060  | 329             | < 0.001 | 97795032; 97794879                     | yes                        |
| Dmpk          | 473  | 4.24            | chr7       | 19668310  | 19669086  | -1006           | < 0.001 | N/A                                    | no                         |
| Cyp2d22       | 474  | 4.22            | chr15      | 82210496  | 82210651  | -4067           | < 0.001 | 82210496                               | no                         |

**Supplemental Table 4. Summary Statistics of WT1 ChIP-chip Peaks and Motif Discovery.**

| Gene                  | Rank | Fold-Enrichment | Chromosome | Start     | End       | Distance to TSS | P-Value | Location of WT1 Matrix/Consensus Site                                                              | WT1 Consensus Site Present |
|-----------------------|------|-----------------|------------|-----------|-----------|-----------------|---------|----------------------------------------------------------------------------------------------------|----------------------------|
| Gria3                 | 474  | 4.22            | chrX       | 38753273  | 38753324  | -1182           | < 0.001 | 38753273                                                                                           | no                         |
| Shoc2                 | 474  | 4.22            | chr19      | 54018617  | 54018809  | -584            | < 0.001 | 54018617                                                                                           | no                         |
| Cebpa                 | 475  | 4.21            | chr7       | 35903869  | 35903922  | -415            | < 0.001 | 35904248                                                                                           | yes                        |
| Zfp503                | 475  | 4.21            | chr14      | 22805389  | 22805704  | 3304            | < 0.001 | 22805652; 22805655; 22805670; 22805669                                                             | yes                        |
| Notch1                | 475  | 4.21            | chr2       | 26358537  | 26358854  | 325             | < 0.001 | 26359271; 26358729; 26358729                                                                       | yes                        |
| Osbpl9                | 475  | 4.21            | chr4       | 108790484 | 108790529 | 18              | < 0.001 | 108790834                                                                                          | yes                        |
| Fgf20                 | 475  | 4.21            | chr8       | 41371379  | 41371618  | 465             | < 0.001 | N/A                                                                                                | no                         |
| Zc3h13                | 476  | 4.2             | chr14      | 75683917  | 75684379  | -235            | < 0.001 | 75684188; 75684342; 75684342; 75684188                                                             | yes                        |
| Adprh                 | 476  | 4.2             | chr16      | 38452240  | 38452536  | 370             | < 0.001 | 38452240                                                                                           | no                         |
| Col4a3bp              | 476  | 4.2             | chr13      | 97312886  | 97312931  | 208             | < 0.001 | 97312951, 97313081, 97312962, 97312945, 97312948                                                   | no                         |
| Calm2                 | 477  | 4.19            | chr17      | 87845920  | 87846305  | 113             | < 0.001 | 87846085; 87846853; 87846852                                                                       | yes                        |
| Icam5                 | 477  | 4.19            | chr9       | 20836015  | 20836466  | -205            | < 0.001 | 20836132; 20836132                                                                                 | yes                        |
| Zbtb1                 | 477  | 4.19            | chr12      | 77471356  | 77471994  | 126             | < 0.001 | 77471492, 77470990, 77470909, 77471414, 77471098, 77471447, 77470924, 77471404, 77471298, 77471129 | no                         |
| Satb1                 | 478  | 4.18            | chr17      | 51972864  | 51973092  | -1108           | < 0.001 | 51973185; 51973185                                                                                 | yes                        |
| Cul5                  | 478  | 4.18            | chr9       | 53475432  | 53475477  | 128             | < 0.001 | 53475802                                                                                           | yes                        |
| Mtag2                 | 478  | 4.18            | chr7       | 52622935  | 52623318  | -784            | < 0.001 | 52623071; 52623070                                                                                 | yes                        |
| Kcnj2                 | 479  | 4.17            | chr11      | 110926612 | 110926888 | -835            | < 0.001 | 110926612                                                                                          | no                         |
| Rbbp5                 | 480  | 4.16            | chr1       | 134373612 | 134373829 | -144            | < 0.001 | 134374121                                                                                          | yes                        |
| Cic                   | 480  | 4.16            | chr7       | 26068017  | 26068199  | 845             | < 0.001 | 26068017                                                                                           | no                         |
| Fzd10                 | 480  | 4.16            | chr5       | 129105459 | 129106137 | -1054           | < 0.001 | 129105459                                                                                          | no                         |
| Rnf180                | 480  | 4.16            | chr13      | 106084400 | 106084445 | -1328           | < 0.001 | 106084722                                                                                          | yes                        |
| Gnb4                  | 481  | 4.15            | chr3       | 32515791  | 32515988  | -505            | < 0.001 | 32515921                                                                                           | yes                        |
| Lgals1                | 481  | 4.15            | chr15      | 78758690  | 78758884  | 1560            | < 0.001 | 78758983                                                                                           | yes                        |
| Zfp637                | 482  | 4.14            | chr6       | 117791617 | 117791847 | 387             | < 0.001 | 117791705                                                                                          | yes                        |
| 2210412D01Rik         | 482  | 4.14            | chr7       | 91300289  | 91300334  | 91              | < 0.001 | 91300465, 91300171                                                                                 | no                         |
| Slc25a5               | 482  | 4.14            | chrX       | 34336171  | 34336330  | 548             | < 0.001 | 34336171                                                                                           | no                         |
| Dpysl5                | 483  | 4.13            | chr5       | 31014236  | 31014676  | 191             | < 0.001 | 31014561; 31014560                                                                                 | yes                        |
| Lass6                 | 483  | 4.13            | chr2       | 68699542  | 68699871  | 235             | < 0.001 | 68699600                                                                                           | yes                        |
| Oaf                   | 483  | 4.13            | chr9       | 43047730  | 43048502  | -245            | < 0.001 | 43047750; 43048380                                                                                 | yes                        |
| Camk2g                | 483  | 4.13            | chr14      | 21612948  | 21613162  | 170             | < 0.001 | 21613038, 21613008, 21612883, 21612779                                                             | no                         |
| Gabra1                | 483  | 4.13            | chr11      | 41996285  | 41996085  | 117             | < 0.001 | 41995762, 41996415                                                                                 | no                         |
| Tial1                 | 483  | 4.13            | chr7       | 135604204 | 135604249 | 801             | < 0.001 | 135604204                                                                                          | no                         |
| Pcdcd4                | 484  | 4.12            | chr19      | 53978213  | 53978607  | 11858           | < 0.001 | 53978447; 53978446                                                                                 | yes                        |
| Phldb1                | 484  | 4.12            | chr9       | 44543144  | 44543809  | -111            | < 0.001 | 44543647                                                                                           | yes                        |
| Gm962                 | 484  | 4.12            | chr19      | 5568063   | 5568108   | 13              | < 0.001 | 5567955, 5567929, 5567821, 5568006, 5567981                                                        | no                         |
| M6prbp1               | 484  | 4.12            | chr17      | 56429044  | 56429922  | 191             | < 0.001 | 56429044                                                                                           | no                         |
| Tmem142a              | 484  | 4.12            | chr5       | 123465983 | 123466255 | 930             | < 0.001 | 123465983                                                                                          | no                         |
| Tgfb1                 | 484  | 4.12            | chr13      | 56710721  | 56710887  | -99             | < 0.001 | N/A                                                                                                | no                         |
| Dusp7                 | 485  | 4.1             | chr9       | 106270464 | 106270690 | -296            | < 0.001 | 106270464                                                                                          | no                         |
| Msi2                  | 485  | 4.1             | chr11      | 88578858  | 88579090  | 481             | < 0.001 | 88578858                                                                                           | no                         |
| Prep                  | 485  | 4.1             | chr7       | 100023176 | 100023362 | -466            | < 0.001 | 100022993, 100023033                                                                               | no                         |
| Robo2                 | 485  | 4.1             | chr16      | 74411465  | 74412068  | -538            | < 0.001 | 74411931                                                                                           | yes                        |
| Ep400                 | 486  | 4.09            | chr5       | 111200099 | 111200144 | -386            | < 0.001 | 111200289                                                                                          | yes                        |
| ENSMUST0000008365.8.1 | 486  | 4.09            | chr18      | 61812765  | 61813570  | -4632           | < 0.001 | N/A                                                                                                | no                         |
| Dhrs3                 | 487  | 4.08            | chr4       | 144482503 | 144482558 | -449            | < 0.001 | 144482503                                                                                          | no                         |
| Mgat1                 | 487  | 4.08            | chr11      | 49058202  | 49058422  | -2748           | < 0.001 | 49057969, 49057741, 49058255                                                                       | no                         |
| Tnfrsf1a              | 487  | 4.08            | chr6       | 125300164 | 125300639 | 730             | < 0.001 | 125300164                                                                                          | no                         |
| Tsga2                 | 487  | 4.08            | chr17      | 31414099  | 31414251  | 75              | < 0.001 | 31414099                                                                                           | no                         |
| Lrba                  | 488  | 4.07            | chr3       | 86027336  | 86027802  | -955            | < 0.001 | N/A                                                                                                | no                         |
| Trp73                 | 489  | 4.06            | chr4       | 153514287 | 153514332 | 7               | < 0.001 | 153514464; 153514463                                                                               | yes                        |
| Tgfb1                 | 489  | 4.06            | chr7       | 26472469  | 26473055  | 635             | < 0.001 | 26472469                                                                                           | no                         |
| Socs3                 | 490  | 4.05            | chr11      | 117830448 | 117831034 | -536            | < 0.001 | 117831052; 117830972                                                                               | yes                        |
| Nfil3                 | 491  | 4.04            | chr13      | 53075458  | 53075958  | 476             | < 0.001 | 53075587                                                                                           | yes                        |
| C430014K11Rik         | 491  | 4.04            | chr15      | 98662411  | 98663415  | -720            | < 0.001 | 98662411                                                                                           | no                         |
| Fem1b                 | 492  | 4.03            | chr9       | 62659838  | 62660122  | -518            | < 0.001 | 62660230                                                                                           | yes                        |
| Twist1                | 492  | 4.03            | chr12      | 34643154  | 34643388  | 641             | < 0.001 | 34643337; 34643280; 34643280                                                                       | yes                        |

**Supplemental Table 4. Summary Statistics of WT1 ChIP-chip Peaks and Motif Discovery.**

| Gene          | Rank | Fold-Enrichment | Chromosome | Start     | End       | Distance to TSS | P-Value | Location of WT1 Matrix/Consensus Site                                                    | WT1 Consensus Site Present |
|---------------|------|-----------------|------------|-----------|-----------|-----------------|---------|------------------------------------------------------------------------------------------|----------------------------|
| Camta2        | 492  | 4.03            | chr11      | 70483346  | 70483551  | 18062           | < 0.001 | N/A                                                                                      | no                         |
| Slc25a19      | 492  | 4.03            | chr11      | 115476279 | 115476339 | 13144           | < 0.001 | N/A                                                                                      | no                         |
| Centg2        | 493  | 4.02            | chr1       | 91351073  | 91350809  | -472            | < 0.001 | 91351006, 91351054                                                                       | no                         |
| Enpep         | 493  | 4.02            | chr3       | 129035572 | 129035747 | 73              | < 0.001 | 129035572                                                                                | no                         |
| Aqp11         | 494  | 4.01            | chr7       | 104886416 | 104886762 | 17              | < 0.001 | 104886779; 104886779                                                                     | yes                        |
| Gpre5c        | 494  | 4.01            | chr11      | 114712308 | 114712705 | -314            | < 0.001 | 114712314; 114712721; 114712720                                                          | yes                        |
| Prdx5         | 494  | 4.01            | chr19      | 6983822   | 6984079   | 286             | < 0.001 | 6984372; 6984375                                                                         | yes                        |
| Fcho1         | 494  | 4.01            | chr8       | 74249221  | 74249419  | 302             | < 0.001 | 74249221                                                                                 | no                         |
| Slc9a3r2      | 494  | 4.01            | chr17      | 24786885  | 24787046  | -5122           | < 0.001 | 24786885                                                                                 | no                         |
| I500004A08Rik | 495  | 4               | chr11      | 3232268   | 3232459   | 1703            | < 0.001 | 3232268                                                                                  | no                         |
| Gng12         | 495  | 4               | chr6       | 66846685  | 66846953  | 481             | < 0.001 | 66846685                                                                                 | no                         |
| Rbpms2        | 495  | 4               | chr9       | 65477991  | 65478163  | -367            | < 0.001 | 65477918, 65477924, 65477915                                                             | no                         |
| Qk            | 495  | 4               | chr17      | 10512925  | 10513269  | -229            | < 0.001 | 10513115; 10513347                                                                       | yes                        |
| C78409        | 495  | 4               | chr10      | 126617542 | 126617072 | 9807            | < 0.001 | 126618161; 126618160                                                                     | yes                        |
| Fbxl14        | 495  | 4               | chr6       | 119429216 | 119429735 | -275            | < 0.001 | 119429632; 119429893; 119429500                                                          | yes                        |
| Mtdh          | 496  | 3.99            | chr15      | 34012013  | 34012204  | -291            | < 0.001 | 34012013                                                                                 | no                         |
| Nr1i2         | 496  | 3.99            | chr16      | 38295612  | 38295868  | -930            | < 0.001 | 38295612                                                                                 | no                         |
| Rev3l         | 497  | 3.98            | chr10      | 39451113  | 39451421  | -829            | < 0.001 | 39451547; 39451495; 39451495                                                             | yes                        |
| Acss1         | 497  | 3.98            | chr2       | 150493460 | 150493885 | 271             | < 0.001 | 150493460                                                                                | no                         |
| Map3k12       | 497  | 3.98            | chr15      | 102347067 | 102347112 | 153             | < 0.001 | 102347501, 102347459, 102347108                                                          | no                         |
| Klh2          | 497  | 3.98            | chr8       | 67374469  | 67374624  | -782            | < 0.001 | N/A                                                                                      | no                         |
| Kpna4         | 498  | 3.97            | chr3       | 68931187  | 68931232  | -196            | < 0.001 | 68931187                                                                                 | no                         |
| Smo           | 498  | 3.97            | chr6       | 29685666  | 29686165  | 328             | < 0.001 | 29685624, 29685622, 29685620, 29685591, 29685589, 29685625, 29685628, 29685623, 29685626 | no                         |
| Wbscr16       | 498  | 3.97            | chr5       | 134652198 | 134652422 | 237             | < 0.001 | 134652198                                                                                | no                         |
| Ppm1e         | 499  | 3.96            | chr11      | 87171290  | 87171994  | 890             | < 0.001 | 87171459; 87171459                                                                       | yes                        |
| Dnajb12       | 499  | 3.96            | chr10      | 59342424  | 59342469  | 108             | < 0.001 | 59342424                                                                                 | no                         |
| Lmbrd1        | 500  | 3.95            | chr1       | 24685213  | 24685422  | 18              | < 0.001 | 24685565                                                                                 | yes                        |
| BC057627      | 501  | 3.94            | chr7       | 16986075  | 16986231  | -439            | < 0.001 | 16986207, 16986172                                                                       | no                         |
| Erc2          | 501  | 3.94            | chr14      | 28435955  | 28436188  | 351             | < 0.001 | 28435802, 28435922                                                                       | no                         |
| Atp6v1f       | 502  | 3.93            | chr6       | 29417825  | 29418213  | 202             | < 0.001 | 29417964; 29417964                                                                       | yes                        |
| Gabpb1        | 502  | 3.93            | chr2       | 126501010 | 126501295 | 186             | < 0.001 | 126501314                                                                                | yes                        |
| Pdzd4         | 503  | 3.92            | chrX       | 71070453  | 71070732  | -168            | < 0.001 | 71070525                                                                                 | yes                        |
| Bcl10         | 503  | 3.92            | chr3       | 145587439 | 145587956 | 591             | < 0.001 | 145587914, 145587744, 145587738                                                          | no                         |
| Ss18l1        | 504  | 3.91            | chr2       | 179777224 | 179777717 | 341             | < 0.001 | 179777608; 179777611                                                                     | yes                        |
| E130310K16Rik | 504  | 3.91            | chr4       | 20705805  | 20706116  | -277            | < 0.001 | 20705805                                                                                 | no                         |
| Grm7          | 504  | 3.91            | chr6       | 110595642 | 110595790 | 177             | < 0.001 | 110595642                                                                                | no                         |
| Sema3f        | 504  | 3.91            | chr9       | 107609828 | 107610571 | 2954            | < 0.001 | 107609828                                                                                | no                         |
| Slc45a3       | 504  | 3.91            | chr1       | 133868973 | 133869172 | 1811            | < 0.001 | 133868973                                                                                | no                         |
| Mat2b         | 505  | 3.9             | chr11      | 40505902  | 40505837  | 191             | < 0.001 | 40505902                                                                                 | no                         |
| Pter          | 506  | 3.89            | chr2       | 12845700  | 12845745  | 55              | < 0.001 | 12845700                                                                                 | no                         |
| Zfp142        | 506  | 3.89            | chr1       | 74634217  | 74634404  | 220             | < 0.001 | 74634461                                                                                 | yes                        |
| Smurf2        | 507  | 3.88            | chr11      | 106781142 | 106781549 | 335             | < 0.001 | 106781142                                                                                | no                         |
| Dill1         | 508  | 3.87            | chr17      | 15512518  | 15513430  | 0               | < 0.001 | 15513054                                                                                 | yes                        |
| Tbc1d10a      | 509  | 3.86            | chr11      | 4086908   | 4087084   | 227             | < 0.001 | 4087002                                                                                  | yes                        |
| Etfb          | 509  | 3.86            | chr7       | 50699045  | 50699100  | -440            | < 0.001 | 50699045                                                                                 | no                         |
| Ucp2          | 509  | 3.86            | chr7       | 107642264 | 107642784 | 557             | < 0.001 | 107642264                                                                                | no                         |
| Enah          | 510  | 3.85            | chr1       | 183949274 | 183949458 | 679             | < 0.001 | 183949373                                                                                | yes                        |
| H3f3a         | 510  | 3.85            | chr1       | 182744336 | 182744381 | -624            | < 0.001 | 182744336                                                                                | no                         |
| Rcc2          | 511  | 3.84            | chr4       | 140258422 | 140259215 | 1554            | < 0.001 | 140259129; 140258559                                                                     | yes                        |
| Itga3         | 511  | 3.84            | chr11      | 94937831  | 94938562  | -504            | < 0.001 | 94937831                                                                                 | no                         |
| Crtc1         | 512  | 3.83            | chr8       | 72962605  | 72963289  | 568             | < 0.001 | 72963469; 72963472                                                                       | yes                        |
| Ctbp2         | 512  | 3.83            | chr7       | 140313851 | 140314515 | 878             | < 0.001 | 140314975; 140314975; 140314137                                                          | yes                        |
| Gli3          | 512  | 3.83            | chr13      | 15554941  | 15555462  | -299            | < 0.001 | 15555284; 15555284                                                                       | yes                        |
| Adamts18      | 512  | 3.83            | chr8       | 116372745 | 116373043 | -281            | < 0.001 | 116372906                                                                                | yes                        |
| Ddx50         | 513  | 3.82            | chr10      | 62114274  | 62114457  | -78             | < 0.001 | 62115221; 62115224                                                                       | yes                        |
| Chr11         | 513  | 3.82            | chr11      | 103993958 | 103994849 | 491             | < 0.001 | 103994224; 103994224                                                                     | yes                        |
| A230074B11Rik | 513  | 3.82            | chr1       | 37086340  | 37086528  | 340             | < 0.001 | 37086289, 37086090                                                                       | no                         |
| Cry2          | 514  | 3.81            | chr2       | 92274279  | 92274671  | -415            | < 0.001 | 92274688                                                                                 | yes                        |

**Supplemental Table 4. Summary Statistics of WT1 ChIP-chip Peaks and Motif Discovery.**

| Gene          | Rank | Fold-Enrichment | Chromosome | Start     | End       | Distance to TSS | P-Value | Location of WT1 Matrix/Consensus Site                                                              | WT1 Consensus Site Present |
|---------------|------|-----------------|------------|-----------|-----------|-----------------|---------|----------------------------------------------------------------------------------------------------|----------------------------|
| Clef1         | 515  | 3.8             | chr19      | 4214010   | 4214749   | -93             | < 0.001 | 4214728; 4214731                                                                                   | yes                        |
| Rgma          | 515  | 3.8             | chr7       | 80519767  | 80520067  | -365            | < 0.001 | 80520030                                                                                           | yes                        |
| Galnt11       | 515  | 3.8             | chr5       | 24728812  | 24729006  | 274             | < 0.001 | 24728784; 24728901                                                                                 | no                         |
| Gtpbp3        | 515  | 3.8             | chr8       | 74009933  | 74010488  | -1677           | < 0.001 | 74009996; 74009920; 74009992; 74009874                                                             | no                         |
| Maged1        | 515  | 3.8             | chrX       | 91786121  | 91786515  | 1093            | < 0.001 | 91785946; 91786228; 91786424                                                                       | no                         |
| Nfatc4        | 515  | 3.8             | chr14      | 56443786  | 56444042  | 176             | < 0.001 | 56443830; 56443759; 56443724; 56443622; 56443936                                                   | no                         |
| Cer10         | 515  | 3.8             | chr11      | 101034756 | 101034962 | 1971            | < 0.001 | N/A                                                                                                | no                         |
| Pdpn          | 516  | 3.79            | chr4       | 142888759 | 142889091 | 454             | < 0.001 | N/A                                                                                                | no                         |
| Mllt3         | 517  | 3.78            | chr4       | 87677901  | 87678193  | 1386            | < 0.001 | 87677952; 87678171                                                                                 | yes                        |
| Hdlbp         | 517  | 3.78            | chr1       | 95375092  | 95375391  | 125             | < 0.001 | 95375185; 95374962                                                                                 | no                         |
| Sfrs7         | 518  | 3.77            | chr17      | 80606235  | 80606426  | 221             | < 0.001 | 80606560; 80606563                                                                                 | yes                        |
| Clqtnf7       | 518  | 3.77            | chr5       | 43906881  | 43907173  | 85              | < 0.001 | 43906881                                                                                           | no                         |
| Prss12        | 519  | 3.76            | chr3       | 123149643 | 123150008 | 36              | < 0.001 | 123150183; 123150013                                                                               | yes                        |
| Insm1         | 519  | 3.76            | chr2       | 146043905 | 146044069 | -3802           | < 0.001 | 146043838; 146043836; 146043108                                                                    | no                         |
| Rapgef3       | 519  | 3.76            | chr15      | 97597793  | 97598298  | -1              | < 0.001 | 97597748; 97598189                                                                                 | no                         |
| Tcf2          | 520  | 3.75            | chr11      | 83666802  | 83666847  | 2454            | < 0.001 | 83667045; 83667045                                                                                 | yes                        |
| Pgep1         | 521  | 3.73            | chr8       | 73183037  | 73184206  | 166             | < 0.001 | 73183067; 73183067                                                                                 | yes                        |
| 4930543L23Rik | 521  | 3.73            | chr11      | 58977070  | 58977115  | 152             | < 0.001 | 58977268; 58977232; 58977174; 58977235; 58977238; 58977244; 58977241                               | no                         |
| Hic1          | 521  | 3.73            | chr11      | 74983538  | 74983708  | -2031           | < 0.001 | 74983538                                                                                           | no                         |
| Ppp1r1a       | 522  | 3.72            | chr15      | 103367759 | 103368134 | 507             | < 0.001 | 103367759                                                                                          | no                         |
| Sox4          | 522  | 3.72            | chr13      | 29043054  | 29050299  | 2471            | < 0.001 | 29050075; 29050064; 29043150; 29043041                                                             | no                         |
| 6330512M04Rik | 523  | 3.71            | chr7       | 149557396 | 149557939 | 568             | < 0.001 | 149557396                                                                                          | no                         |
| BC020002      | 523  | 3.71            | chr6       | 8159471   | 8159622   | 266             | < 0.001 | 8159471                                                                                            | no                         |
| 9430078G10Rik | 524  | 3.7             | chr19      | 4397704   | 4397883   | -783            | < 0.001 | N/A                                                                                                | no                         |
| Osbp16        | 525  | 3.69            | chr2       | 76244452  | 76245242  | 232             | < 0.001 | 76245410; 76245409                                                                                 | yes                        |
| Abcf2         | 525  | 3.69            | chr5       | 24082546  | 24083087  | 295             | < 0.001 | 24082546                                                                                           | no                         |
| BC021395      | 525  | 3.69            | chr18      | 24688267  | 24688749  | 251             | < 0.001 | 24688267                                                                                           | no                         |
| Copz2         | 525  | 3.69            | chr11      | 96711201  | 96711578  | 195             | < 0.001 | 96711154; 96711240; 96711280; 96711257; 96711268                                                   | no                         |
| D130059P03Rik | 525  | 3.69            | chr6       | 38383301  | 38383498  | -448            | < 0.001 | 38383301                                                                                           | no                         |
| Igfbp6        | 525  | 3.69            | chr15      | 101974940 | 101975408 | 554             | < 0.001 | 101973868; 101975101                                                                               | no                         |
| Ptgs1         | 525  | 3.69            | chr2       | 36085913  | 36085958  | -9              | < 0.001 | 36085913                                                                                           | no                         |
| Dek           | 526  | 3.68            | chr13      | 47200560  | 47201480  | 640             | < 0.001 | 47200719; 47201562                                                                                 | yes                        |
| Tmsb4x        | 526  | 3.68            | chrX       | 163645680 | 163646772 | 1440            | < 0.001 | 163645940; 163646649; 163645943                                                                    | yes                        |
| Adamts19      | 527  | 3.67            | chr18      | 58997329  | 58997518  | 1079            | < 0.001 | 58997691; 58997691                                                                                 | yes                        |
| BC005764      | 527  | 3.67            | chr10      | 79336789  | 79337086  | 315             | < 0.001 | 79337293; 79337399                                                                                 | yes                        |
| Hexim1        | 527  | 3.67            | chr11      | 102977872 | 102977922 | 259             | < 0.001 | 102977872                                                                                          | no                         |
| Trap1         | 528  | 3.66            | chr16      | 4077929   | 4077979   | -144            | < 0.001 | 4078034                                                                                            | yes                        |
| Gfra1         | 529  | 3.65            | chr19      | 58528940  | 58529251  | -132            | < 0.001 | 58529353                                                                                           | yes                        |
| 1200009O22Rik | 529  | 3.65            | chr6       | 53771016  | 53771062  | -351            | < 0.001 | 53770994; 53770988                                                                                 | no                         |
| 9930021D14Rik | 529  | 3.65            | chr17      | 24610550  | 24611004  | -32             | < 0.001 | 24610550                                                                                           | no                         |
| Tspan4        | 529  | 3.65            | chr7       | 148662496 | 148662544 | 1382            | < 0.001 | 148662496                                                                                          | no                         |
| Anapc5        | 530  | 3.64            | chr5       | 123271427 | 123271478 | -104            | < 0.001 | N/A                                                                                                | no                         |
| Foxd2         | 531  | 3.63            | chr4       | 114580611 | 114581050 | 475             | < 0.001 | 114580517; 114580542                                                                               | no                         |
| lkbke         | 531  | 3.63            | chr1       | 133173777 | 133173957 | 2336            | < 0.001 | 133173777                                                                                          | no                         |
| Hmg20b        | 532  | 3.62            | chr10      | 80812912  | 80813089  | 89              | < 0.001 | 80813537                                                                                           | yes                        |
| Sfrs9         | 532  | 3.62            | chr5       | 115777146 | 115777191 | -17             | < 0.001 | 115777338; 115777408; 115777458; 115777458                                                         | yes                        |
| Tbl2          | 532  | 3.62            | chr5       | 135625600 | 135625863 | 42              | < 0.001 | 135625733                                                                                          | yes                        |
| Clic1         | 532  | 3.62            | chr17      | 35187226  | 35187271  | 61              | < 0.001 | 35187134; 35187335; 38825161; 38825381; 38825167                                                   | no                         |
| Hipk2         | 532  | 3.62            | chr6       | 38825227  | 38826773  | -561            | < 0.001 | 38826790; 38826669                                                                                 | no                         |
| Aftph         | 533  | 3.6             | chr11      | 20641433  | 20641726  | 31              | < 0.001 | 20641730; 20641729; 20641745; 20641744                                                             | yes                        |
| Hpc4          | 533  | 3.6             | chr4       | 128798571 | 128798746 | -2722           | < 0.001 | 128798822; 128798825                                                                               | yes                        |
| Arf3          | 533  | 3.6             | chr15      | 98593655  | 98593700  | -129            | < 0.001 | 98592726; 98593446; 98593440; 98593437; 98592577; 98593011; 98593085; 98593209; 98592929; 98592485 | no                         |
| BC055324      | 533  | 3.6             | chr1       | 165924509 | 165924671 | 265             | < 0.001 | 165924509                                                                                          | no                         |
| Lrn3          | 533  | 3.6             | chr12      | 42211651  | 42212093  | 660             | < 0.001 | 42211651                                                                                           | no                         |
| Slc9a2        | 533  | 3.6             | chr1       | 40737661  | 40737835  | -746            | < 0.001 | 40737661                                                                                           | no                         |
| Trpm4         | 534  | 3.59            | chr7       | 52588589  | 52588811  | 362             | < 0.001 | 52588589                                                                                           | no                         |
| Ifngr2        | 535  | 3.58            | chr16      | 91546993  | 91547369  | -315            | < 0.001 | 91547448; 91547448                                                                                 | yes                        |
| Irf3          | 535  | 3.58            | chr7       | 52256148  | 52256376  | 3141            | < 0.001 | 52256472; 52256472                                                                                 | yes                        |
| Efnal         | 535  | 3.58            | chr3       | 89083818  | 89084174  | -282            | < 0.001 | 89083818                                                                                           | no                         |

**Supplemental Table 4. Summary Statistics of WT1 ChIP-chip Peaks and Motif Discovery.**

| Gene          | Rank | Fold-Enrichment | Chromosome | Start     | End       | Distance to TSS | P-Value | Location of WT1 Matrix/Consensus Site                                       | WT1 Consensus Site Present |
|---------------|------|-----------------|------------|-----------|-----------|-----------------|---------|-----------------------------------------------------------------------------|----------------------------|
| Slc12a4       | 535  | 3.58            | chr8       | 108489489 | 108489726 | 427             | < 0.001 | 108489489                                                                   | no                         |
| Lmna          | 535  | 3.58            | chr3       | 88305881  | 88306466  | -8897           | < 0.001 | 88306256                                                                    | yes                        |
| Eif1a         | 536  | 3.57            | chr18      | 46757254  | 46757753  | 125             | < 0.001 | 46757505                                                                    | yes                        |
| Arhgef7       | 536  | 3.57            | chr8       | 11758430  | 11758673  | 123             | < 0.001 | 11758760; 11758493; 11758766                                                | yes                        |
| Ntn4          | 537  | 3.56            | chr10      | 93103940  | 93103985  | 17              | < 0.001 | 93104038; 93104038                                                          | yes                        |
| Hk2           | 537  | 3.56            | chr6       | 82722578  | 82723248  | 1554            | < 0.001 | 82722578                                                                    | no                         |
| Fzd4          | 538  | 3.55            | chr7       | 96552793  | 96552838  | -87             | < 0.001 | 96553040; 96553043                                                          | yes                        |
| Hlfx          | 538  | 3.55            | chr6       | 87930395  | 87930780  | 1058            | < 0.001 | 87930851; 87930560                                                          | yes                        |
| Smek1         | 538  | 3.55            | chr12      | 102321738 | 102321783 | -150            | < 0.001 | 102322025; 102322025                                                        | yes                        |
| Hectd2        | 538  | 3.55            | chr19      | 36628499  | 36628992  | -747            | < 0.001 | 36628499                                                                    | no                         |
| Dlat          | 539  | 3.54            | chr9       | 50467607  | 50468021  | 23              | < 0.001 | 50468015                                                                    | yes                        |
| Irf2          | 539  | 3.54            | chr8       | 47825107  | 47825305  | 33              | < 0.001 | 47825069; 47825053                                                          | no                         |
| Orc4l         | 539  | 3.54            | chr2       | 48805177  | 48805467  | -545            | < 0.001 | 48805008; 48805100                                                          | no                         |
| Hmgal         | 539  | 3.54            | chr17      | 27694412  | 27694630  | 908             | < 0.001 | 27694589; 27694630                                                          | yes                        |
| Yap1          | 540  | 3.53            | chr9       | 8003576   | 8003912   | 982             | < 0.001 | 8003888                                                                     | yes                        |
| Cgnl1         | 540  | 3.53            | chr9       | 71619204  | 71619249  | 183             | < 0.001 | 71619330; 71619330                                                          | yes                        |
| Atf2          | 540  | 3.53            | chr2       | 73730863  | 73731396  | -476            | < 0.001 | 73731039; 73731269; 73731269; 73731039; 73731249                            | yes                        |
| Sbno2         | 540  | 3.53            | chr10      | 79564908  | 79565120  | 349             | < 0.001 | 79564908                                                                    | no                         |
| Vps26b        | 540  | 3.53            | chr9       | 26836819  | 26837012  | 652             | < 0.001 | 26836819                                                                    | no                         |
| BCO62109      | 541  | 3.52            | chr5       | 100587581 | 100587632 | 1221            | < 0.001 | 100587581                                                                   | no                         |
| Sync          | 541  | 3.52            | chr4       | 128964591 | 128964858 | -250            | < 0.001 | 128964458; 128964456; 128964773; 128964544; 128964744; 128964486; 128964788 | no                         |
| Nr4a2         | 541  | 3.52            | chr2       | 56967817  | 56967862  | -174            | < 0.001 | 56967833                                                                    | yes                        |
| Smarca5       | 542  | 3.51            | chr8       | 83262579  | 83262637  | 750             | < 0.001 | 83262667                                                                    | yes                        |
| Timm8b        | 542  | 3.51            | chr9       | 50412490  | 50412550  | 515             | < 0.001 | 50412500                                                                    | yes                        |
| Dkk1          | 542  | 3.51            | chr19      | 30624062  | 30624253  | -98             | < 0.001 | 30624007; 30624118                                                          | no                         |
| Rbm4b         | 543  | 3.49            | chr19      | 4756056   | 4756312   | -234            | < 0.001 | 4756056                                                                     | no                         |
| Rce1          | 543  | 3.49            | chr19      | 4625115   | 4625283   | 357             | < 0.001 | 4625115                                                                     | no                         |
| Rara          | 543  | 3.49            | chr11      | 98800369  | 98800602  | 1566            | < 0.001 | 98800563                                                                    | yes                        |
| Pi4k2a        | 544  | 3.48            | chr19      | 42164890  | 42165423  | 476             | < 0.001 | 42164982; 42164781; 42165191; 42165104                                      | yes                        |
| Usp21         | 545  | 3.47            | chr1       | 173218313 | 173218362 | -281            | < 0.001 | 173218313                                                                   | no                         |
| Rbp1          | 546  | 3.46            | chr9       | 98322119  | 98322488  | -1089           | < 0.001 | 98322119                                                                    | no                         |
| Als2cr4       | 547  | 3.45            | chr1       | 59176967  | 59177012  | -50             | < 0.001 | 59177242                                                                    | yes                        |
| Arl6ip6       | 548  | 3.44            | chr2       | 53051317  | 53051566  | 196             | < 0.001 | 53051391                                                                    | yes                        |
| Vdr           | 548  | 3.44            | chr15      | 97738015  | 97738571  | 179             | < 0.001 | 97738601; 97738601                                                          | yes                        |
| Svil          | 549  | 3.43            | chr18      | 4921809   | 4922006   | 1420            | < 0.001 | 4922091                                                                     | yes                        |
| Ube2c         | 550  | 3.42            | chr2       | 164595335 | 164595380 | -70             | < 0.001 | 164595746                                                                   | yes                        |
| Nrd1          | 550  | 3.42            | chr4       | 108673549 | 108673747 | 315             | < 0.001 | 108673553; 108673553                                                        | yes                        |
| Tomm20        | 550  | 3.42            | chr8       | 129468612 | 129468775 | 984             | < 0.001 | 129468612                                                                   | no                         |
| Rab3a         | 550  | 3.42            | chr8       | 73278541  | 73278586  | -844            | < 0.001 | 73278841; 73278840                                                          | yes                        |
| Dock11        | 551  | 3.41            | chrX       | 33429456  | 33429699  | 654             | < 0.001 | 33429535                                                                    | yes                        |
| Hoxd3         | 551  | 3.41            | chr2       | 74578842  | 74578900  | 28822           | < 0.001 | 74578949; 74578948                                                          | yes                        |
| Tbcc          | 551  | 3.41            | chr17      | 47026766  | 47027173  | -775            | < 0.001 | 47026948                                                                    | yes                        |
| I110059P08Rik | 551  | 3.41            | chr10      | 14425387  | 14425445  | -121            | < 0.001 | 14425387                                                                    | no                         |
| Pla2g12a      | 551  | 3.41            | chr3       | 129581951 | 129581996 | -2127           | < 0.001 | N/A                                                                         | no                         |
| Srebf2        | 552  | 3.4             | chr15      | 81977689  | 81977844  | 124             | < 0.001 | 81977976; 81977975                                                          | yes                        |
| Kif2a         | 552  | 3.4             | chr13      | 107811684 | 107811851 | 366             | < 0.001 | 107811684                                                                   | no                         |
| Map3k1        | 552  | 3.4             | chr13      | 112599486 | 112599961 | -747            | < 0.001 | 112599486                                                                   | no                         |
| Nradd         | 553  | 3.38            | chr9       | 110526725 | 110527161 | 31              | < 0.001 | 110527205                                                                   | yes                        |
| Fasn          | 553  | 3.38            | chr11      | 120685592 | 120686117 | 63              | < 0.001 | 120685960; 120685501; 120685630; 120685718; 120685652                       | no                         |
| Grec10        | 553  | 3.38            | chr6       | 124690842 | 124690887 | 233             | < 0.001 | 124690842                                                                   | no                         |
| Ugp2          | 553  | 3.38            | chr11      | 21271281  | 21270990  | -490            | < 0.001 | 21271211; 21271335; 21270939; 21270882; 21271397                            | no                         |
| Tmem86a       | 554  | 3.37            | chr7       | 54306288  | 54306567  | 301             | < 0.001 | 54306526; 54306525                                                          | yes                        |
| D11Bwg0517e   | 554  | 3.37            | chr11      | 118769006 | 118769363 | 1852            | < 0.001 | N/A                                                                         | no                         |
| Csnk2a1       | 555  | 3.36            | chr2       | 152052291 | 152052336 | -261            | < 0.001 | 152052291                                                                   | no                         |
| Pdlim4        | 555  | 3.36            | chr11      | 53882568  | 53882434  | 244             | < 0.001 | 53882568                                                                    | no                         |
| Phka1         | 556  | 3.35            | chrX       | 99839836  | 99839886  | -276            | 0.01    | 99840206; 99840206                                                          | yes                        |
| Sh3glb1       | 556  | 3.35            | chr3       | 144382973 | 144383018 | 291             | < 0.001 | 144383376                                                                   | yes                        |
| Atf3          | 556  | 3.35            | chr1       | 193007729 | 193007774 | -540            | < 0.001 | 193007688; 193007850                                                        | no                         |
| Six2          | 557  | 3.34            | chr17      | 86088110  | 86088338  | -551            | < 0.001 | 86088110                                                                    | no                         |

**Supplemental Table 4. Summary Statistics of WT1 ChIP-chip Peaks and Motif Discovery.**

| Gene          | Rank | Fold-Enrichment | Chromosome | Start     | End       | Distance to TSS | P-Value | Location of WT1 Matrix/Consensus Site                                                  | WT1 Consensus Site Present |
|---------------|------|-----------------|------------|-----------|-----------|-----------------|---------|----------------------------------------------------------------------------------------|----------------------------|
| Mlst2         | 558  | 3.33            | chr7       | 120657497 | 120657542 | 145             | < 0.001 | 120657759; 120657791; 120657762                                                        | yes                        |
| Tex2          | 558  | 3.33            | chr11      | 106473732 | 106473908 | 360             | < 0.001 | 106473732                                                                              | no                         |
| Neo1          | 558  | 3.33            | chr9       | 58883355  | 58883809  | 602             | < 0.001 | N/A                                                                                    | no                         |
| Trpc4         | 559  | 3.32            | chr3       | 53959829  | 53960072  | -173            | < 0.001 | 53960141                                                                               | yes                        |
| Pias3         | 559  | 3.32            | chr3       | 96500489  | 96500536  | -2833           | < 0.001 | N/A                                                                                    | no                         |
| Nptx1         | 560  | 3.31            | chr11      | 119408322 | 119408368 | 789             | < 0.001 | 119408322                                                                              | no                         |
| Rbbp7         | 560  | 3.31            | chrX       | 159197594 | 159197654 | -679            | < 0.001 | 159197978, 159197987, 159197975, 159198056, 159197969, 159197981, 159197972, 159197984 | no                         |
| Cd151         | 560  | 3.31            | chr7       | 148653743 | 148653993 | -721            | < 0.001 | 148653907                                                                              | yes                        |
| Eif2c1        | 560  | 3.31            | chr4       | 126145099 | 126145144 | 543             | < 0.001 | N/A                                                                                    | no                         |
| Dbi           | 561  | 3.3             | chr1       | 122017064 | 122016936 | 410             | < 0.001 | 122017064                                                                              | no                         |
| Gadd45g       | 561  | 3.3             | chr13      | 51940890  | 51941166  | -919            | < 0.001 | 51940890                                                                               | no                         |
| Jub           | 561  | 3.3             | chr14      | 55197111  | 55197289  | -1007           | < 0.001 | 55197111                                                                               | no                         |
| 1700040103Rik | 561  | 3.3             | chr6       | 85401101  | 85401146  | 118             | < 0.001 | 85401640; 85401643                                                                     | yes                        |
| Sqstm1        | 562  | 3.29            | chr11      | 50023991  | 50024036  | 278             | < 0.001 | 50023994; 50024218                                                                     | yes                        |
| Fzd8          | 562  | 3.29            | chr18      | 9212568   | 9212827   | -116            | < 0.001 | N/A                                                                                    | no                         |
| Ier2          | 563  | 3.28            | chr8       | 87184590  | 87185065  | 1716            | < 0.001 | 87184590                                                                               | no                         |
| 2700081015Rik | 564  | 3.27            | chr19      | 7496954   | 7497452   | 2040            | < 0.001 | 7497572                                                                                | yes                        |
| Sema4g        | 564  | 3.27            | chr19      | 45064365  | 45064697  | 838             | < 0.001 | 45064646; 45064649                                                                     | yes                        |
| Smpd1         | 565  | 3.26            | chr7       | 112702921 | 112703261 | 194             | < 0.001 | 112702921                                                                              | no                         |
| Ctcf          | 565  | 3.26            | chr8       | 108159946 | 108159991 | -469            | < 0.001 | 108160364; 108160363                                                                   | yes                        |
| Boc           | 566  | 3.25            | chr16      | 44558931  | 44558990  | 23              | < 0.001 | 44559048, 44559034, 44559104, 44559107, 44559102, 44559105, 44559100                   | no                         |
| Kiss1r        | 566  | 3.25            | chr10      | 79383229  | 79383277  | 3538            | < 0.001 | 79383229                                                                               | no                         |
| Selm          | 566  | 3.25            | chr11      | 3417367   | 3417077   | 2689            | < 0.001 | N/A                                                                                    | no                         |
| Rybp          | 567  | 3.24            | chr6       | 100237002 | 100237047 | 328             | < 0.001 | 100237073; 100237348                                                                   | yes                        |
| Bbx           | 567  | 3.24            | chr16      | 50431167  | 50431354  | 1301            | < 0.001 | 50431167                                                                               | no                         |
| Frzb          | 567  | 3.24            | chr2       | 80287642  | 80288229  | -225            | < 0.001 | 80287642                                                                               | no                         |
| Nuak1         | 568  | 3.23            | chr10      | 83903495  | 83903799  | -78             | < 0.001 | 83903880; 83903621                                                                     | yes                        |
| Stx16         | 568  | 3.23            | chr2       | 173900894 | 173900941 | -1633           | < 0.001 | 173901013, 173900790                                                                   | no                         |
| 2810002009Rik | 568  | 3.23            | chrX       | 92640105  | 92640511  | -117            | < 0.001 | N/A                                                                                    | no                         |
| Rims2         | 569  | 3.22            | chr15      | 39029769  | 39030067  | 165             | < 0.001 | 39029796; 39030166; 39030165                                                           | yes                        |
| Dcbld2        | 569  | 3.22            | chr16      | 58408637  | 58408682  | 13              | < 0.001 | 58408734, 58408604                                                                     | no                         |
| Syt12         | 569  | 3.22            | chr19      | 4476572   | 4476880   | 285             | < 0.001 | 4476572                                                                                | no                         |
| Clock         | 570  | 3.21            | chr5       | 76733017  | 76733063  | 533             | < 0.001 | 76733174                                                                               | yes                        |
| Sgtb          | 570  | 3.21            | chr13      | 104900312 | 104900372 | 473             | < 0.001 | 104900312                                                                              | no                         |
| Tro           | 570  | 3.21            | chrX       | 147091449 | 147091638 | 503             | < 0.001 | 147091250, 147091251, 147091249, 147091253                                             | no                         |
| Dhx29         | 570  | 3.21            | chr13      | 113718231 | 113718282 | 256             | < 0.001 | N/A                                                                                    | no                         |
| Ar            | 571  | 3.19            | chrX       | 95344313  | 95344358  | -752            | < 0.001 | 95344313                                                                               | no                         |
| D15Wsu169e    | 571  | 3.19            | chr15      | 76648086  | 76648131  | 473             | < 0.001 | 76648086                                                                               | no                         |
| Smarcc1       | 571  | 3.19            | chr9       | 110034235 | 110034295 | -262            | < 0.001 | 110034167, 110034183, 110034181                                                        | no                         |
| Prkar2b       | 572  | 3.18            | chr12      | 32745554  | 32745599  | 568             | < 0.001 | 32745604, 32745741                                                                     | no                         |
| Pcd6ip        | 572  | 3.18            | chr9       | 113617010 | 113617055 | 193             | < 0.001 | 113617113                                                                              | yes                        |
| Ascl2         | 573  | 3.17            | chr7       | 150154892 | 150154940 | 216             | < 0.001 | 150154919                                                                              | yes                        |
| Lcmt1         | 573  | 3.17            | chr7       | 130521550 | 130521859 | 78              | < 0.001 | 130521501, 130521512                                                                   | no                         |
| Pfn2          | 573  | 3.17            | chr3       | 57651976  | 57652021  | -539            | < 0.001 | 57651896, 57651852, 57651831                                                           | no                         |
| Til           | 573  | 3.17            | chr2       | 128892133 | 128892188 | 433             | < 0.001 | 128892331, 128892325                                                                   | no                         |
| EG329763      | 574  | 3.16            | chr3       | 137729003 | 137729052 | 1324            | < 0.001 | 137729175                                                                              | yes                        |
| Rbm35a        | 574  | 3.16            | chr4       | 11314286  | 11314331  | -378            | < 0.001 | 11314550                                                                               | yes                        |
| Unc84a        | 574  | 3.16            | chr5       | 139676493 | 139676538 | -107            | < 0.001 | 139676493                                                                              | no                         |
| B3gnt8        | 574  | 3.16            | chr7       | 26412258  | 26412311  | -358            | < 0.001 | 26412332; 26412335                                                                     | yes                        |
| 1700012H17Rik | 575  | 3.15            | chr4       | 5571046   | 5571510   | 33              | < 0.001 | 5571542                                                                                | yes                        |
| Larp2         | 575  | 3.15            | chr3       | 40753322  | 40753367  | -1208           | < 0.001 | 40753737; 40753742; 40753736                                                           | yes                        |
| Dnajc7        | 576  | 3.14            | chr11      | 100480323 | 100480711 | 794             | < 0.001 | 100480747; 100480750                                                                   | yes                        |
| Nr0b1         | 576  | 3.14            | chrX       | 83437053  | 83437098  | -37             | < 0.001 | 83437053                                                                               | no                         |
| Atxn2l        | 577  | 3.13            | chr7       | 133647017 | 133647062 | -224            | < 0.001 | 133647202; 133647428; 133647428                                                        | yes                        |
| Tspan5        | 577  | 3.13            | chr3       | 138405783 | 138406005 | 648             | < 0.001 | 138405976                                                                              | yes                        |
| Klhl23        | 578  | 3.12            | chr2       | 69660693  | 69660738  | 187             | < 0.001 | 69661062; 69661062                                                                     | yes                        |
| Zmat3         | 578  | 3.12            | chr3       | 32264530  | 32264575  | 35              | < 0.001 | 32264819; 32264819                                                                     | yes                        |
| Sph1          | 579  | 3.11            | chr19      | 44144104  | 44144514  | -476            | < 0.001 | 44144395                                                                               | yes                        |

**Supplemental Table 4. Summary Statistics of WT1 ChIP-chip Peaks and Motif Discovery.**

| Gene              | Rank | Fold-Enrichment | Chromosome | Start     | End       | Distance to TSS | P-Value | Location of WT1 Matrix/Consensus Site                      | WT1 Consensus Site Present |
|-------------------|------|-----------------|------------|-----------|-----------|-----------------|---------|------------------------------------------------------------|----------------------------|
| Lmx1b             | 579  | 3.11            | chr2       | 33492022  | 33492082  | 3979            | < 0.001 | N/A                                                        | no                         |
| Perld1            | 579  | 3.11            | chr11      | 98249743  | 98249790  | 12038           | < 0.001 | N/A                                                        | no                         |
| Ncoa7             | 580  | 3.09            | chr10      | 30522818  | 30522713  | 223             | < 0.001 | 30522991                                                   | yes                        |
| C230021P08Rik     | 580  | 3.09            | chr15      | 99288146  | 99288191  | 11              | < 0.001 | 99288146                                                   | no                         |
| Pfkl              | 581  | 3.08            | chr10      | 77472235  | 77472281  | 283             | < 0.001 | 77472524                                                   | yes                        |
| BC054817          | 581  | 3.08            | chr8       | 55615454  | 55615499  | -125            | < 0.001 | N/A                                                        | no                         |
| Top3b             | 582  | 3.07            | chr16      | 16871155  | 16871200  | 195             | < 0.001 | 16871211                                                   | yes                        |
| Fip1l1            | 582  | 3.07            | chr5       | 74931848  | 74931893  | 329             | < 0.001 | 74932188; 74932187                                         | yes                        |
| Ccher1            | 582  | 3.07            | chr17      | 35654277  | 35654322  | 240             | < 0.001 | 35653835; 35653837                                         | no                         |
| Fgf18             | 582  | 3.07            | chr11      | 33048071  | 33048261  | -694            | < 0.001 | 33048071                                                   | no                         |
| Lhx1              | 582  | 3.07            | chr11      | 84339400  | 84339799  | -736            | < 0.001 | 84339400                                                   | no                         |
| Mif4gd            | 582  | 3.07            | chr11      | 115475848 | 115476198 | -2359           | < 0.001 | 115475848                                                  | no                         |
| Tep11l2           | 582  | 3.07            | chr10      | 84039720  | 84040043  | 169             | < 0.001 | 84039720                                                   | no                         |
| Mltl1             | 583  | 3.06            | chr17      | 57074994  | 57075039  | -205            | < 0.001 | 57074994                                                   | no                         |
| Sh3pxd2a          | 583  | 3.06            | chr19      | 47539365  | 47539423  | -493            | < 0.001 | 47539365                                                   | no                         |
| Pip5k1c           | 584  | 3.05            | chr10      | 80756000  | 80756159  | 298             | < 0.001 | 80756251; 80756137                                         | yes                        |
| Tob1              | 584  | 3.05            | chr11      | 94071952  | 94072012  | -785            | < 0.001 | 94071952                                                   | no                         |
| Lhx2              | 585  | 3.03            | chr2       | 38206287  | 38206342  | -513            | 0.01    | 38206287                                                   | no                         |
| Rpp25             | 585  | 3.03            | chr9       | 57351125  | 57351185  | -753            | < 0.001 | 57351125                                                   | no                         |
| Atp11a            | 586  | 3.02            | chr8       | 12756785  | 12756958  | -79             | < 0.001 | 12757075                                                   | yes                        |
| Dnajb5            | 586  | 3.02            | chr4       | 42963544  | 42963777  | -2399           | < 0.001 | 42964161; 42964161; 42964071; 42963662; 42963662; 42964015 | yes                        |
| Klf6              | 587  | 3.01            | chr13      | 5860614   | 5860659   | -98             | < 0.001 | 5860918; 5860918                                           | yes                        |
| Mapk1             | 588  | 2.99            | chr16      | 16983413  | 16983591  | -38             | < 0.001 | 16983551                                                   | yes                        |
| Echdc3            | 589  | 2.98            | chr2       | 6134339   | 6134384   | -322            | 0.01    | 6134609                                                    | yes                        |
| Pea15             | 589  | 2.98            | chr1       | 174137321 | 174137370 | -434            | 0.01    | 174137321                                                  | no                         |
| Smyd3             | 589  | 2.98            | chr1       | 181446979 | 181447039 | 1125            | 0.01    | 181446979                                                  | no                         |
| Llg1l             | 590  | 2.97            | chr11      | 60512523  | 60512568  | -795            | < 0.001 | 60512695; 60512695                                         | yes                        |
| I600021P15Rik     | 590  | 2.97            | chr16      | 28930318  | 28930365  | -558            | < 0.001 | 28930318                                                   | no                         |
| Arhgap10          | 590  | 2.97            | chr8       | 80041309  | 80041475  | 354             | 0.01    | 80041309                                                   | no                         |
| Dusp23            | 590  | 2.97            | chr1       | 174562756 | 174562801 | 327             | 0.01    | 174562684; 174562678                                       | no                         |
| Teerg1l           | 590  | 2.97            | chr7       | 145591790 | 145591837 | -2401           | 0.01    | 145591790                                                  | no                         |
| Tcf7l2            | 590  | 2.97            | chr19      | 55817291  | 55817338  | 555             | < 0.001 | 55817291                                                   | no                         |
| Cdc14a            | 590  | 2.97            | chr3       | 116126767 | 116126922 | 50              | 0.01    | N/A                                                        | no                         |
| Six5              | 591  | 2.96            | chr7       | 19680549  | 19680799  | 884             | 0.01    | 19681178; 19681126; 19680977; 19681132; 19680971           | yes                        |
| Nsg1              | 592  | 2.95            | chr5       | 38550211  | 38550979  | 46              | 0.01    | 38550907; 38550907; 38550957; 38550956                     | yes                        |
| Irx3              | 592  | 2.95            | chr8       | 94326130  | 94326318  | -1023           | 0.01    | 94326192                                                   | yes                        |
| Sfrs6             | 592  | 2.95            | chr2       | 162757568 | 162757613 | 310             | 0.01    | 162757845                                                  | yes                        |
| Marveld1          | 592  | 2.95            | chr19      | 42222908  | 42223347  | -522            | < 0.001 | 42222974; 42222956                                         | no                         |
| Mst1r             | 593  | 2.94            | chr9       | 107808929 | 107808975 | -267            | < 0.001 | 107809157; 107808873; 107808879                            | no                         |
| Zfyve19           | 593  | 2.94            | chr2       | 119034894 | 119034939 | 224             | 0.01    | 119034547; 119034553                                       | no                         |
| Coll2a1           | 594  | 2.93            | chr9       | 79566742  | 79567134  | -279            | < 0.001 | 79566924; 79566923                                         | yes                        |
| Peolce            | 595  | 2.92            | chr5       | 138052181 | 138052231 | 426             | 0.01    | N/A                                                        | no                         |
| Ptprv             | 595  | 2.92            | chr1       | 137025771 | 137025816 | 3358            | 0.01    | N/A                                                        | no                         |
| Arid5b            | 596  | 2.91            | chr10      | 67739915  | 67739510  | 1688            | < 0.001 | 67739915                                                   | no                         |
| Gnb2              | 596  | 2.91            | chr5       | 137972966 | 137973011 | 1469            | 0.01    | 137972966                                                  | no                         |
| Mars2             | 597  | 2.9             | chr1       | 55293773  | 55293828  | -220            | 0.01    | 55294138                                                   | yes                        |
| Rcor1             | 597  | 2.9             | chr12      | 112276678 | 112276723 | -1308           | < 0.001 | 112276816; 112276815                                       | yes                        |
| Pcm1              | 597  | 2.9             | chr8       | 42326141  | 42326192  | 1054            | 0.01    | 42326141                                                   | no                         |
| Rnd1              | 597  | 2.9             | chr15      | 98507899  | 98508182  | -32             | < 0.001 | 98507899                                                   | no                         |
| Rnf152            | 597  | 2.9             | chr1       | 107252019 | 107252079 | 1198            | 0.01    | N/A                                                        | no                         |
| St6galnac6        | 598  | 2.89            | chr2       | 32463323  | 32463371  | 867             | 0.01    | 32463401                                                   | yes                        |
| Aldh4a1           | 598  | 2.89            | chr4       | 139180613 | 139180673 | 1719            | 0.01    | N/A                                                        | no                         |
| Bcl2l11           | 599  | 2.88            | chr2       | 127953786 | 127953833 | 2037            | 0.01    | 127953786                                                  | no                         |
| Crtc3             | 600  | 2.86            | chr7       | 87833192  | 87833237  | 549             | 0.01    | 87833391; 87833407; 87833247; 87833410; 87833413           | no                         |
| Ripk3             | 600  | 2.86            | chr14      | 56407647  | 56407702  | -51             | 0.01    | 56407647                                                   | no                         |
| Chek1             | 601  | 2.85            | chr9       | 36533706  | 36533751  | 484             | < 0.001 | 36533766; 36533820                                         | no                         |
| ENSMUST0000008366 | 601  | 2.85            | chr14      | 65208893  | 65208938  | -578            | 0.01    | N/A                                                        | no                         |
| 3.1               |      |                 |            |           |           |                 |         |                                                            |                            |
| Ung               | 601  | 2.85            | chr5       | 114581338 | 114581383 | 196             | 0.01    | N/A                                                        | no                         |

**Supplemental Table 4. Summary Statistics of WT1 ChIP-chip Peaks and Motif Discovery.**

| Gene          | Rank | Fold-Enrichment | Chromosome | Start     | End       | Distance to TSS | P-Value | Location of WT1 Matrix/Consensus Site            | WT1 Consensus Site Present |
|---------------|------|-----------------|------------|-----------|-----------|-----------------|---------|--------------------------------------------------|----------------------------|
| Bmp2k         | 602  | 2.84            | chr5       | 97425958  | 97426018  | -719            | 0.01    | 97426366; 97426369; 97426363                     | yes                        |
| Atp6v1b2      | 603  | 2.83            | chr8       | 71612286  | 71612346  | -366            | 0.01    | 71612721                                         | yes                        |
| Hnrp11        | 603  | 2.83            | chr17      | 80460974  | 80461019  | 678             | 0.01    | 80461439                                         | yes                        |
| Rnf135        | 603  | 2.83            | chr11      | 79997610  | 79997655  | 259             | 0.01    | 79997929                                         | yes                        |
| 2900010M23Rik | 603  | 2.83            | chr17      | 27268579  | 27268629  | 2232            | 0.01    | 27268579                                         | no                         |
| Hsd11b2       | 603  | 2.83            | chr8       | 108042457 | 108042502 | -165            | 0.01    | N/A                                              | no                         |
| Casp9         | 604  | 2.82            | chr4       | 141349557 | 141349776 | 228             | 0.01    | 141349900                                        | yes                        |
| Ap4s1         | 604  | 2.82            | chr12      | 52792066  | 52792111  | 136             | 0.01    | 52792182                                         | yes                        |
| Klhl26        | 604  | 2.82            | chr8       | 73001755  | 73001801  | -930            | 0.01    | 73001650, 73001708                               | no                         |
| Slc25a39      | 604  | 2.82            | chr11      | 102269280 | 102269326 | -517            | 0.01    | 102269280                                        | no                         |
| Lnpep         | 605  | 2.81            | chr17      | 17761820  | 17761865  | -389            | 0.01    | 17761663, 17761621, 17761644                     | no                         |
| Pim3          | 605  | 2.81            | chr15      | 88694593  | 88694639  | 1993            | 0.01    | 88694593                                         | no                         |
| Unc5c         | 605  | 2.81            | chr3       | 141128216 | 141128261 | -289            | 0.01    | 141128322, 141128077                             | no                         |
| Ppm2c         | 605  | 2.81            | chr4       | 11893616  | 11893661  | -41             | 0.01    | N/A                                              | no                         |
| Bnip1         | 606  | 2.8             | chr17      | 26918234  | 26918282  | 223             | 0.01    | 26918597; 26918597                               | yes                        |
| Perl          | 606  | 2.8             | chr11      | 68910469  | 68910517  | -1957           | 0.01    | 68910651                                         | yes                        |
| Sphk1         | 606  | 2.8             | chr11      | 116393916 | 116393961 | -722            | 0.01    | 116394216                                        | yes                        |
| Slc32a1       | 606  | 2.8             | chr2       | 158438762 | 158438822 | 2299            | 0.01    | 158439442; 158439060; 158439059                  | yes                        |
| Cnn3          | 606  | 2.8             | chr3       | 121130496 | 121130548 | 1064            | 0.01    | 121130496                                        | no                         |
| Eya4          | 606  | 2.8             | chr10      | 23068134  | 23068191  | 1547            | 0.01    | 23068134                                         | no                         |
| Klf9          | 606  | 2.8             | chr19      | 23216509  | 23216554  | 817             | 0.01    | 23216509                                         | no                         |
| Ppic          | 606  | 2.8             | chr18      | 53577975  | 53578026  | -339            | 0.01    | 53577975                                         | no                         |
| Wbp4          | 606  | 2.8             | chr14      | 79881066  | 79881111  | -13             | 0.01    | 79881066                                         | no                         |
| Pdgfb         | 607  | 2.79            | chr15      | 79845530  | 79845575  | -314            | 0.01    | 79845565                                         | yes                        |
| Islr          | 607  | 2.79            | chr9       | 58006612  | 58006659  | 313             | 0.01    | 58006612                                         | no                         |
| Pold4         | 607  | 2.79            | chr19      | 4231607   | 4231659   | -303            | 0.01    | 4231607                                          | no                         |
| Pitx2         | 607  | 2.79            | chr3       | 128917636 | 128917685 | 806             | 0.01    | N/A                                              | no                         |
| Zfp28         | 607  | 2.79            | chr7       | 6336307   | 6336359   | 306             | 0.01    | N/A                                              | no                         |
| 2310057D15Rik | 608  | 2.78            | chr5       | 100469514 | 100469561 | 506             | 0.01    | 100469514                                        | no                         |
| D4Ert429e     | 608  | 2.78            | chr4       | 149111492 | 149111540 | 627             | 0.01    | 149111492                                        | no                         |
| Pafah1b3      | 608  | 2.78            | chr7       | 26082495  | 26082540  | 456             | 0.01    | 26082495                                         | no                         |
| Spin1         | 609  | 2.77            | chr13      | 51196711  | 51196756  | 468             | 0.01    | 51196871; 51196783; 51196871; 51196766; 51196898 | yes                        |
| Tb11xr1       | 609  | 2.77            | chr3       | 21975835  | 21975880  | 285             | 0.01    | 21976122; 21975957                               | yes                        |
| Wt1           | 609  | 2.77            | chr2       | 104967268 | 104967313 | 605             | 0.01    | 104967697; 104967544; 104967543                  | yes                        |
| Lox3          | 609  | 2.77            | chr6       | 82984198  | 82984250  | 7               | 0.01    | 82983462, 82984029, 82984023, 82983514           | no                         |
| Mtf2          | 609  | 2.77            | chr5       | 108495220 | 108495271 | 486             | 0.01    | 108495220                                        | no                         |
| ORF19         | 609  | 2.77            | chr17      | 66461035  | 66461080  | 74              | 0.01    | 66461413                                         | yes                        |
| Lamc1         | 610  | 2.76            | chr1       | 155180081 | 155180126 | -188            | 0.01    | 155180262                                        | yes                        |
| Ssr3          | 610  | 2.76            | chr3       | 65196135  | 65196183  | 316             | 0.01    | 65196319                                         | yes                        |
| Utp14b        | 610  | 2.76            | chr1       | 78654844  | 78654889  | 418             | 0.01    | 78655133; 78655132                               | yes                        |
| 2810451A06Rik | 610  | 2.76            | chr15      | 98928265  | 98928314  | -1624           | 0.01    | 98927578, 98927062, 98928078                     | no                         |
| Cerk          | 610  | 2.76            | chr15      | 86019375  | 86019428  | -2831           | 0.01    | 86019375                                         | no                         |
| Fblim1        | 610  | 2.76            | chr4       | 141154340 | 141154385 | 7585            | 0.01    | 141154340                                        | no                         |
| Cdkn1a        | 611  | 2.75            | chr17      | 29231458  | 29231503  | 764             | 0.01    | 29231811                                         | yes                        |
| Dkk2          | 611  | 2.75            | chr3       | 131748415 | 131748460 | 174             | 0.01    | 131748693                                        | yes                        |
| C79267        | 611  | 2.75            | chr4       | 139155120 | 139155165 | 24092           | 0.01    | 139155120                                        | no                         |
| Itrp3         | 611  | 2.75            | chr17      | 27195780  | 27195835  | 1560            | 0.01    | 27195780                                         | no                         |
| Nckap1        | 611  | 2.75            | chr2       | 80421892  | 80421952  | -800            | 0.01    | 80421892                                         | no                         |
| Tbx15         | 611  | 2.75            | chr3       | 99058121  | 99058170  | 464             | 0.01    | 99058121                                         | no                         |
| B4galnt3      | 611  | 2.75            | chr6       | 120244677 | 120244722 | -123            | 0.01    | N/A                                              | no                         |
| Tnfrsf25      | 612  | 2.74            | chr4       | 151490094 | 151490139 | -335            | 0.01    | 151490261                                        | yes                        |
| Rad51c        | 612  | 2.74            | chr11      | 87217969  | 87218014  | -51             | 0.01    | 87218225                                         | yes                        |
| Celsr3        | 612  | 2.74            | chr9       | 108729017 | 108729062 | 390             | 0.01    | 108729017                                        | no                         |
| Ing1          | 613  | 2.73            | chr8       | 11557333  | 11557378  | 1291            | 0.01    | 11557501                                         | yes                        |
| Fads3         | 613  | 2.73            | chr19      | 10116032  | 10116077  | 17              | 0.01    | 10115985, 10116106, 10116004                     | no                         |
| Tmem4         | 613  | 2.73            | chr10      | 127760070 | 127760125 | 584             | 0.01    | 127760070                                        | no                         |
| Cldn12        | 614  | 2.72            | chr5       | 5514598   | 5514644   | 252             | 0.01    | 5514598                                          | no                         |
| EG622320      | 614  | 2.72            | chr7       | 104481288 | 104481341 | 482             | 0.01    | 104481288                                        | no                         |

**Supplemental Table 4. Summary Statistics of WT1 ChIP-chip Peaks and Motif Discovery.**

| Gene          | Rank | Fold-Enrichment | Chromosome | Start     | End       | Distance to TSS | P-Value | Location of WT1 Matrix/Consensus Site                 | WT1 Consensus Site Present |
|---------------|------|-----------------|------------|-----------|-----------|-----------------|---------|-------------------------------------------------------|----------------------------|
| Tfrc          | 614  | 2.72            | chr16      | 32609095  | 32609140  | 12              | 0.01    | 32609095                                              | no                         |
| Col27a1       | 614  | 2.72            | chr4       | 62875997  | 62876048  | -423            | 0.01    | N/A                                                   | no                         |
| Slc4a4        | 614  | 2.72            | chr5       | 89358861  | 89358910  | 42602           | 0.01    | N/A                                                   | no                         |
| Tmem178       | 614  | 2.72            | chr17      | 81343388  | 81343444  | -555            | 0.01    | N/A                                                   | no                         |
| Arpc5         | 615  | 2.71            | chr1       | 154613675 | 154613720 | -84             | 0.01    | 154613855; 154613750; 154613855; 154613753            | yes                        |
| Btg2          | 615  | 2.71            | chr1       | 135974801 | 135974847 | 908             | 0.01    | 135974801                                             | no                         |
| Bhlhb3        | 616  | 2.7             | chr6       | 145812432 | 145814359 | -476            | 0.01    | 145812771; 145812549; 145812549                       | yes                        |
| Mcam          | 616  | 2.7             | chr9       | 43939819  | 43939867  | -2897           | 0.01    | 43940359                                              | yes                        |
| A930012O16Rik | 616  | 2.7             | chr2       | 57091009  | 57091054  | 325             | 0.01    | 57090807; 57090352                                    | no                         |
| Col11a1       | 616  | 2.7             | chr3       | 113734164 | 113734224 | 737             | 0.01    | 113734164                                             | no                         |
| Siva1         | 616  | 2.7             | chr12      | 113883685 | 113883735 | 588             | 0.01    | 113883685                                             | no                         |
| Adam11        | 617  | 2.69            | chr11      | 102624273 | 102624333 | 1551            | 0.01    | 102624233; 102624232                                  | no                         |
| Cryz1         | 617  | 2.69            | chr16      | 91728741  | 91728791  | 78              | 0.01    | 91728741                                              | no                         |
| Rai14         | 617  | 2.69            | chr15      | 10644922  | 10644982  | -1657           | 0.01    | 10644922                                              | no                         |
| Rps20         | 617  | 2.69            | chr4       | 3763103   | 3763157   | -383            | 0.01    | 3763103                                               | no                         |
| Adora1        | 617  | 2.69            | chr1       | 136132844 | 136132893 | -860            | 0.01    | N/A                                                   | no                         |
| Notch3        | 618  | 2.68            | chr17      | 32303094  | 32303139  | 681             | 0.01    | 32303230                                              | yes                        |
| Chml          | 618  | 2.68            | chr1       | 177622081 | 177622127 | -3620           | 0.01    | 177622081                                             | no                         |
| Exoc6         | 618  | 2.68            | chr19      | 37625608  | 37625668  | 731             | 0.01    | 37625608                                              | no                         |
| Gpc4          | 618  | 2.68            | chrX       | 49517356  | 49517405  | 1049            | 0.01    | 49517339; 49517441                                    | no                         |
| Cdh2          | 619  | 2.67            | chr18      | 16968053  | 16968098  | -518            | 0.01    | 16968144                                              | yes                        |
| D8Erd82e      | 619  | 2.67            | chr8       | 37157736  | 37157781  | -123            | 0.01    | 37158016                                              | yes                        |
| Nedd4         | 619  | 2.67            | chr9       | 72510243  | 72510438  | 263             | 0.01    | 72510291; 72510459; 72510458                          | yes                        |
| AB041550      | 619  | 2.67            | chr6       | 87680838  | 87680883  | -2              | 0.01    | 87680838                                              | no                         |
| Magi1         | 619  | 2.67            | chr6       | 94234327  | 94234492  | -452            | 0.01    | 94234327                                              | no                         |
| Tpp1          | 619  | 2.67            | chr7       | 112900439 | 112900487 | 258             | 0.01    | 112900439                                             | no                         |
| Klc2          | 619  | 2.67            | chr19      | 5117799   | 5118023   | 408             | 0.01    | 5118093; 5118096                                      | yes                        |
| Hnrpd         | 619  | 2.67            | chr5       | 100407017 | 100407075 | 911             | 0.01    | N/A                                                   | no                         |
| Pebp4         | 619  | 2.67            | chr9       | 106355355 | 106355400 | -842            | 0.01    | N/A                                                   | no                         |
| Trpv4         | 620  | 2.66            | chr5       | 115108145 | 115108190 | 228             | 0.01    | 115108271; 115108271                                  | yes                        |
| Usp1          | 620  | 2.66            | chr4       | 98590973  | 98591018  | 496             | 0.01    | 98591003                                              | yes                        |
| Efnb3         | 620  | 2.66            | chr11      | 69373973  | 69374018  | -316            | 0.01    | 69373973                                              | no                         |
| Kenj5         | 620  | 2.66            | chr9       | 32152335  | 32152381  | -536            | 0.01    | 32152335                                              | no                         |
| Rnf150        | 620  | 2.66            | chr8       | 85388301  | 85388346  | 1070            | 0.01    | 85388406; 85389108; 85389107                          | yes                        |
| Psip1         | 621  | 2.65            | chr4       | 83132050  | 83132095  | 222             | 0.01    | 83132356; 83132356                                    | yes                        |
| AK122525      | 621  | 2.65            | chr10      | 43198487  | 43198369  | -435            | 0.01    | 43198487                                              | no                         |
| Mlnt10        | 621  | 2.65            | chr2       | 17978287  | 17978332  | 1413            | 0.01    | 17977968; 17977824; 17977962                          | no                         |
| Spes1         | 621  | 2.65            | chr14      | 31814428  | 31814476  | 97              | 0.01    | 31814428                                              | no                         |
| Gad1          | 622  | 2.64            | chr2       | 70404492  | 70406550  | 4296            | 0.01    | 70404492                                              | no                         |
| Zfyve1        | 622  | 2.64            | chr12      | 84937526  | 84937586  | 541             | 0.01    | 84937526                                              | no                         |
| 4930566A11Rik | 623  | 2.63            | chr8       | 112230471 | 112230530 | 513             | 0.01    | 112231005                                             | yes                        |
| Anxa5         | 623  | 2.63            | chr3       | 36375565  | 36375616  | -970            | 0.01    | 36375827                                              | yes                        |
| Mib1          | 623  | 2.63            | chr18      | 10726494  | 10726539  | 894             | 0.01    | 10726763                                              | yes                        |
| 4930483J18Rik | 623  | 2.63            | chr15      | 81021469  | 81021517  | -306            | 0.01    | 81021469                                              | no                         |
| Has2          | 623  | 2.63            | chr15      | 56525132  | 56525184  | 943             | 0.01    | 56525132                                              | no                         |
| Hoxa6         | 623  | 2.63            | chr6       | 52158636  | 52158696  | -43             | 0.01    | 52158636                                              | no                         |
| Hs3st3b1      | 623  | 2.63            | chr11      | 63734619  | 63734664  | 1144            | 0.01    | 63734619                                              | no                         |
| Mapre3        | 623  | 2.63            | chr5       | 31117505  | 31117550  | 400             | 0.01    | 31117505                                              | no                         |
| Hist1h1c      | 624  | 2.62            | chr13      | 23831404  | 23831458  | 756             | 0.01    | 23831404                                              | no                         |
| Prkce         | 624  | 2.62            | chr17      | 86566207  | 86566564  | -1387           | 0.01    | 86566207                                              | no                         |
| Mark4         | 624  | 2.62            | chr7       | 20043645  | 20043690  | 175             | 0.01    | N/A                                                   | no                         |
| Sms           | 625  | 2.61            | chrX       | 153928957 | 153929003 | 998             | 0.01    | 153928984; 153928984                                  | yes                        |
| Fgf16         | 625  | 2.61            | chrX       | 102959541 | 102959598 | -245            | 0.01    | 102959555                                             | yes                        |
| 3732412D22Rik | 625  | 2.61            | chr5       | 67137351  | 67137396  | 296             | 0.01    | N/A                                                   | no                         |
| Jarid1b       | 626  | 2.6             | chr1       | 136457887 | 136457932 | 1156            | 0.01    | 136457960; 136457958; 136457955; 136457880; 136457957 | no                         |
| Tmem42        | 626  | 2.6             | chr9       | 122930322 | 122930367 | -99             | 0.01    | 122930322                                             | no                         |
| Ghr           | 626  | 2.6             | chr15      | 3532152   | 3532207   | 1050            | 0.01    | N/A                                                   | no                         |
| Extl2         | 627  | 2.59            | chr3       | 115710429 | 115710476 | 58              | 0.01    | 115710542; 115710542                                  | yes                        |

**Supplemental Table 4. Summary Statistics of WT1 ChIP-chip Peaks and Motif Discovery.**

| Gene          | Rank | Fold-Enrichment | Chromosome | Start     | End       | Distance to TSS | P-Value | Location of WT1 Matrix/Consensus Site      | WT1 Consensus Site Present |
|---------------|------|-----------------|------------|-----------|-----------|-----------------|---------|--------------------------------------------|----------------------------|
| Dnajc4        | 627  | 2.59            | chr19      | 7062390   | 7062440   | 4347            | 0.01    | 7062452; 7062452; 7062441; 7062441         | yes                        |
| Eml4          | 627  | 2.59            | chr17      | 83750364  | 83750409  | 116             | 0.01    | 83750432; 83750462; 83750432               | yes                        |
| Zfp3612       | 627  | 2.59            | chr17      | 84587416  | 84587786  | -477            | 0.01    | 84587781                                   | yes                        |
| 4930570C03Rik | 627  | 2.59            | chr15      | 97612834  | 97612882  | -1937           | 0.01    | 97612834                                   | no                         |
| 4933439F18Rik | 627  | 2.59            | chr11      | 60231764  | 60231809  | 982             | 0.01    | 60231764                                   | no                         |
| Cd72          | 627  | 2.59            | chr4       | 43466819  | 43466872  | 652             | 0.01    | 43466819                                   | no                         |
| Arl5a         | 628  | 2.58            | chr2       | 52280113  | 52280158  | 258             | 0.01    | 52280113                                   | no                         |
| Bccip         | 628  | 2.58            | chr7       | 140901040 | 140901085 | 47              | 0.01    | 140901040                                  | no                         |
| Sema3e        | 628  | 2.58            | chr5       | 14025556  | 14025601  | 303             | 0.01    | 14025556                                   | no                         |
| 5730410I19Rik | 629  | 2.57            | chr12      | 103995793 | 103995838 | -368            | 0.01    | 103995932; 103995935                       | yes                        |
| Foxe3         | 629  | 2.57            | chr4       | 114598323 | 114598368 | 272             | 0.01    | 114598323                                  | no                         |
| Siae          | 629  | 2.57            | chr9       | 37421778  | 37421838  | 377             | 0.01    | 37420930; 37420968                         | no                         |
| Slc31a2       | 629  | 2.57            | chr4       | 61948074  | 61948126  | 622             | 0.01    | 61947992; 61947970                         | no                         |
| Syncrip       | 629  | 2.57            | chr9       | 88378054  | 88378101  | -843            | 0.01    | 88378054                                   | no                         |
| Rasgrf1       | 629  | 2.57            | chr9       | 89805071  | 89805116  | 482             | 0.01    | N/A                                        | no                         |
| Hspa12b       | 630  | 2.56            | chr2       | 130950169 | 130950218 | -2953           | 0.01    | 130950253; 130950252                       | yes                        |
| Kif21b        | 630  | 2.56            | chr1       | 138025110 | 138025159 | -2843           | 0.01    | 138025110                                  | no                         |
| 4831426I19Rik | 630  | 2.56            | chr12      | 106248179 | 106248224 | -183            | 0.01    | 106248608; 106248611                       | yes                        |
| Matr3         | 631  | 2.55            | chr18      | 35722226  | 35722271  | 437             | 0.01    | 35722493                                   | yes                        |
| 4930471M23Rik | 631  | 2.55            | chr5       | 30951036  | 30951093  | 729             | 0.01    | 30951036                                   | no                         |
| Lrp1          | 631  | 2.55            | chr10      | 127058554 | 127058604 | -375            | 0.01    | 127058554                                  | no                         |
| Kctd14        | 631  | 2.55            | chr7       | 104602038 | 104602086 | 138             | 0.01    | 104602310                                  | yes                        |
| Il17ra        | 632  | 2.54            | chr6       | 120413667 | 120413712 | 439             | 0.01    | 120413667                                  | no                         |
| Brd4          | 633  | 2.53            | chr17      | 32420767  | 32420819  | 261             | 0.01    | 32420767                                   | no                         |
| Gab1          | 633  | 2.53            | chr8       | 83403659  | 83403704  | 696             | 0.01    | 83403659                                   | no                         |
| Loxl1         | 633  | 2.53            | chr9       | 58159975  | 58160020  | 995             | 0.01    | 58159975                                   | no                         |
| 4933406E20Rik | 633  | 2.53            | chr9       | 108481412 | 108481457 | 18497           | 0.01    | N/A                                        | no                         |
| Tmem2         | 633  | 2.53            | chr19      | 21853510  | 21853560  | 704             | 0.01    | N/A                                        | no                         |
| Dusp1         | 634  | 2.52            | chr17      | 26645406  | 26645451  | -22             | 0.01    | 26645406                                   | no                         |
| Tnrc9         | 635  | 2.51            | chr8       | 92871435  | 92871494  | 687             | 0.01    | 92871739                                   | yes                        |
| Prkci         | 635  | 2.51            | chr3       | 30895370  | 30895430  | 708             | 0.01    | 30895370                                   | no                         |
| Ywhaz         | 635  | 2.51            | chr15      | 36722413  | 36722458  | 1563            | 0.01    | 36722499; 36722546; 36722304               | no                         |
| Aff4          | 636  | 2.5             | chr11      | 53164022  | 53164067  | -290            | 0.01    | 53164313                                   | yes                        |
| Pou2f1        | 636  | 2.5             | chr1       | 167933593 | 167933638 | -851            | 0.01    | 167933773; 167933773                       | yes                        |
| D830007B15Rik | 636  | 2.5             | chr5       | 67998427  | 67998487  | -664            | 0.01    | 67998427                                   | no                         |
| Prrx1         | 637  | 2.49            | chr1       | 165243230 | 165243290 | 521             | 0.01    | 165243381                                  | yes                        |
| Scube3        | 637  | 2.49            | chr17      | 28278566  | 28278886  | -882            | 0.01    | 28278900                                   | yes                        |
| 2610018G03Rik | 637  | 2.49            | chrX       | 48194857  | 48194902  | 268             | 0.01    | 48194857                                   | no                         |
| Ube3a         | 637  | 2.49            | chr7       | 66484303  | 66484348  | 205             | 0.01    | 66484303                                   | no                         |
| 2810025M15Rik | 638  | 2.48            | chr1       | 159342555 | 159342600 | -509            | 0.01    | 159342984; 159342984                       | yes                        |
| D230039L06Rik | 638  | 2.48            | chr1       | 180459213 | 180459268 | -15             | 0.01    | 180459037; 180459014                       | no                         |
| Impdh1        | 638  | 2.48            | chr6       | 29161861  | 29161906  | 387             | 0.01    | 29161861                                   | no                         |
| Clmn          | 638  | 2.48            | chr12      | 106103083 | 106103128 | 180             | 0.01    | 106103137; 106103140; 106103139; 106103139 | yes                        |
| Tpm3          | 638  | 2.48            | chr3       | 89884090  | 89884135  | 7497            | 0.01    | N/A                                        | no                         |
| Wbp1          | 638  | 2.48            | chr6       | 83071607  | 83071659  | -178            | 0.01    | N/A                                        | no                         |
| Csnk1a1       | 639  | 2.47            | chr18      | 61714747  | 61714792  | -465            | 0.01    | 61714741; 61714840                         | no                         |
| Fus           | 639  | 2.47            | chr7       | 135112108 | 135112166 | 1145            | 0.01    | 135112108                                  | no                         |
| Gjb5          | 639  | 2.47            | chr4       | 127035334 | 127035389 | 46              | 0.01    | 127035334                                  | no                         |
| Tbl1x         | 639  | 2.47            | chrX       | 74755641  | 74755698  | -895            | 0.01    | 74755641                                   | no                         |
| 1110007A13Rik | 640  | 2.46            | chr7       | 135883760 | 135883805 | 161             | 0.01    | 135884021; 135884011; 135884011            | yes                        |
| Ddit3         | 640  | 2.46            | chr10      | 126727841 | 126727899 | 22              | 0.01    | 126727614; 126727555; 126727569            | no                         |
| Golph3        | 640  | 2.46            | chr15      | 12251784  | 12251829  | 556             | 0.01    | 12251784                                   | no                         |
| Itpka         | 640  | 2.46            | chr2       | 119567113 | 119567168 | -932            | 0.01    | 119567113                                  | no                         |
| Serpinf2      | 640  | 2.46            | chr11      | 75257506  | 75257701  | -4701           | 0.01    | 75257506                                   | no                         |
| Tcf23         | 640  | 2.46            | chr5       | 31271100  | 31271147  | 75              | 0.01    | 31271100                                   | no                         |
| Gabarapl1     | 641  | 2.45            | chr6       | 129483763 | 129483808 | 577             | 0.01    | 129484023; 129484172; 129484172            | yes                        |
| Efcab2        | 642  | 2.44            | chr1       | 180336712 | 180336765 | 727             | 0.01    | 180336850; 180336849                       | yes                        |
| Csnk1g1       | 642  | 2.44            | chr9       | 65757469  | 65757514  | 676             | 0.01    | 65757469                                   | no                         |

**Supplemental Table 4. Summary Statistics of WT1 ChIP-chip Peaks and Motif Discovery.**

| Gene          | Rank | Fold-Enrichment | Chromosome | Start     | End       | Distance to TSS | P-Value | Location of WT1 Matrix/Consensus Site                                                  | WT1 Consensus Site Present |
|---------------|------|-----------------|------------|-----------|-----------|-----------------|---------|----------------------------------------------------------------------------------------|----------------------------|
| ORF61         | 642  | 2.44            | chr10      | 79446969  | 79447014  | 83              | 0.01    | 79446939, 79446823, 79446820, 79446936, 79446955, 79446952, 79446949, 79446942         | no                         |
| Parp1         | 642  | 2.44            | chr1       | 182499354 | 182499399 | 271             | 0.01    | 182499354                                                                              | no                         |
| Trim8         | 642  | 2.44            | chr19      | 46578552  | 46578604  | 2441            | 0.01    | 46578552                                                                               | no                         |
| BC049834      | 642  | 2.44            | chr1       | 157589636 | 157589681 | -501            | 0.01    | N/A                                                                                    | no                         |
| Rbm26         | 642  | 2.44            | chr14      | 105576359 | 105576404 | 162             | 0.01    | N/A                                                                                    | no                         |
| Snx9          | 642  | 2.44            | chr17      | 5940354   | 5940406   | -899            | 0.01    | N/A                                                                                    | no                         |
| Mobk12b       | 643  | 2.43            | chr4       | 35104308  | 35104353  | 385             | 0.01    | 35104564; 35104564                                                                     | yes                        |
| Ntn1          | 643  | 2.43            | chr11      | 68200097  | 68200151  | 204             | 0.01    | 68200295                                                                               | yes                        |
| Ap1g2         | 643  | 2.43            | chr14      | 55724155  | 55724201  | 924             | 0.01    | 55724155                                                                               | no                         |
| Cx3cl1        | 643  | 2.43            | chr8       | 97296262  | 97296307  | 205             | 0.01    | 97296340, 97296301                                                                     | no                         |
| Grin2a        | 643  | 2.43            | chr16      | 9993307   | 9993353   | -704            | 0.01    | 9993307                                                                                | no                         |
| Scotin        | 643  | 2.43            | chr9       | 108940937 | 108940982 | -180            | 0.01    | 108940937                                                                              | no                         |
| Dpf3          | 643  | 2.43            | chr12      | 84828992  | 84829051  | -364            | 0.01    | N/A                                                                                    | no                         |
| D18Ert653e    | 644  | 2.42            | chr18      | 68093054  | 68093099  | 166             | 0.01    | 68093302; 68093165                                                                     | yes                        |
| Impdh2        | 644  | 2.42            | chr9       | 108462617 | 108462662 | -191            | 0.01    | 108462735; 108462735; 108462741                                                        | yes                        |
| Grifin        | 644  | 2.42            | chr5       | 141041664 | 141041709 | -665            | 0.01    | N/A                                                                                    | no                         |
| Zfand5        | 645  | 2.41            | chr19      | 21346974  | 21347246  | 229             | 0.01    | 21347211; 21347214                                                                     | yes                        |
| Atxn1         | 645  | 2.41            | chr13      | 46059468  | 46059513  | 855             | 0.01    | 46059602, 46059301, 46059307                                                           | no                         |
| Bcat1         | 645  | 2.41            | chr6       | 145024191 | 145024238 | 837             | 0.01    | 145024191                                                                              | no                         |
| Pitpna        | 645  | 2.41            | chr11      | 75402224  | 75402270  | 638             | 0.01    | N/A                                                                                    | no                         |
| 5730469M10Rik | 646  | 2.4             | chr14      | 41827057  | 41827102  | -16             | 0.01    | 41827357; 41827321                                                                     | yes                        |
| D130058121Rik | 646  | 2.4             | chr11      | 72227461  | 72227825  | -2269           | 0.01    | 72227461                                                                               | no                         |
| Otx1          | 646  | 2.4             | chr11      | 21901663  | 21901708  | -32             | 0.01    | 21901663                                                                               | no                         |
| Rhoq          | 646  | 2.4             | chr17      | 87363663  | 87363709  | 1236            | 0.01    | 87363663                                                                               | no                         |
| Socs2         | 646  | 2.4             | chr10      | 94879962  | 94880007  | -529            | 0.01    | 94879962                                                                               | no                         |
| Slc4a3        | 647  | 2.39            | chr1       | 75543580  | 75543635  | 768             | 0.01    | 75543830                                                                               | yes                        |
| Farp2         | 647  | 2.39            | chr1       | 95408479  | 95408524  | -199            | 0.01    | 95408864; 95408864; 95408982                                                           | yes                        |
| Cbx4          | 647  | 2.39            | chr11      | 118947634 | 118947824 | -251            | 0.01    | 118947435, 118947738, 118947476, 118947441, 118947479, 118947714, 118947473, 118947482 | no                         |
| Pdgfa         | 647  | 2.39            | chr5       | 139473699 | 139473744 | -2815           | 0.01    | 139473699                                                                              | no                         |
| Vps37d        | 647  | 2.39            | chr5       | 135553361 | 135553421 | 745             | 0.01    | 135553361                                                                              | no                         |
| Wdr34         | 647  | 2.39            | chr2       | 29904621  | 29904666  | -245            | 0.01    | 29904621                                                                               | no                         |
| Igsf9         | 647  | 2.39            | chr1       | 174412825 | 174412884 | 407             | 0.01    | N/A                                                                                    | no                         |
| Mef2d         | 648  | 2.38            | chr3       | 87943128  | 87943179  | -3162           | 0.01    | 87943260; 87943263                                                                     | yes                        |
| Igf2bp1       | 648  | 2.38            | chr11      | 95866555  | 95866600  | 680             | 0.01    | 95866555                                                                               | no                         |
| Nr2f1         | 648  | 2.38            | chr13      | 78341408  | 78341465  | -3193           | 0.01    | 78341408                                                                               | no                         |
| Ptpn9         | 648  | 2.38            | chr9       | 56842904  | 56842949  | 152             | 0.01    | 56842904                                                                               | no                         |
| Cnot6         | 649  | 2.37            | chr11      | 49525901  | 49525946  | 288             | 0.01    | 49526162                                                                               | yes                        |
| Ube2e2        | 649  | 2.37            | chr14      | 19726109  | 19726154  | 9               | 0.01    | 19726192; 19726521; 19726192; 19726524; 19726358; 19726357                             | yes                        |
| Mos           | 649  | 2.37            | chr4       | 3802604   | 3802664   | -3382           | 0.01    | 3802738                                                                                | yes                        |
| Apbb1         | 650  | 2.35            | chr7       | 112729410 | 112729456 | 616             | 0.02    | 112729593; 112729596                                                                   | yes                        |
| Prpf4b        | 650  | 2.35            | chr13      | 34966102  | 34966147  | -1238           | 0.01    | 34966497; 34966500; 34966499; 34966499; 34966436; 34966436                             | yes                        |
| AU041783      | 650  | 2.35            | chr19      | 57081772  | 57082017  | 869             | 0.01    | 57081772                                                                               | no                         |
| Car14         | 650  | 2.35            | chr3       | 95709491  | 95709539  | -953            | 0.02    | 95709491                                                                               | no                         |
| Celsr1        | 650  | 2.35            | chr15      | 85865187  | 85865247  | -1010           | 0.01    | 85865187                                                                               | no                         |
| Gpr176        | 650  | 2.35            | chr2       | 118200157 | 118200216 | -1139           | 0.02    | 118200157                                                                              | no                         |
| Tgfb3         | 650  | 2.35            | chr5       | 107718440 | 107718485 | 77              | 0.02    | 107718312, 107718602                                                                   | no                         |
| Rbpms         | 650  | 2.35            | chr8       | 35039595  | 35039646  | 693             | 0.02    | N/A                                                                                    | no                         |
| Nfat5         | 651  | 2.34            | chr8       | 109817620 | 109817665 | 273             | 0.02    | 109817816, 109817829, 109817621, 109817808, 109817533, 109817827, 109817665            | no                         |
| Slc35b2       | 651  | 2.34            | chr17      | 45701033  | 45701078  | -44             | 0.01    | N/A                                                                                    | no                         |
| Stk10         | 651  | 2.34            | chr11      | 32433540  | 32433585  | 297             | 0.01    | N/A                                                                                    | no                         |
| Hoxa2         | 652  | 2.33            | chr6       | 52114976  | 52115036  | -176            | 0.02    | 52115375                                                                               | yes                        |
| Emp1          | 652  | 2.33            | chr6       | 135312720 | 135312778 | -199            | 0.02    | 135312720                                                                              | no                         |
| Slc38a2       | 653  | 2.32            | chr15      | 96529511  | 96529556  | 595             | 0.01    | 96529590                                                                               | yes                        |
| Usp25         | 653  | 2.32            | chr16      | 77013828  | 77013873  | -463            | 0.01    | 77014094; 77014094                                                                     | yes                        |

**Supplemental Table 4. Summary Statistics of WT1 ChIP-chip Peaks and Motif Discovery.**

| Gene                     | Rank | Fold-Enrichment | Chromosome | Start     | End       | Distance to TSS | P-Value | Location of WT1 Matrix/Consensus Site                 | WT1 Consensus Site Present |
|--------------------------|------|-----------------|------------|-----------|-----------|-----------------|---------|-------------------------------------------------------|----------------------------|
| Zfp367                   | 653  | 2.32            | chr13      | 64253572  | 64253617  | 913             | 0.01    | 64254002                                              | yes                        |
| B4galt2                  | 653  | 2.32            | chr4       | 117555686 | 117555731 | 366             | 0.02    | 117555686                                             | no                         |
| Dhx35                    | 653  | 2.32            | chr2       | 158620321 | 158620366 | -211            | 0.02    | 158620468, 158620466, 158620511, 158620464, 158620520 | no                         |
| Vipr1                    | 653  | 2.32            | chr9       | 121552322 | 121552367 | 511             | 0.01    | 121552322                                             | no                         |
| ENSMUST0000002686<br>5.5 | 653  | 2.32            | chr3       | 41367883  | 41367943  | -933            | 0.02    | N/A                                                   | no                         |
| C030014K22Rik            | 654  | 2.31            | chr1       | 168930753 | 168930798 | -829            | 0.02    | 168931227                                             | yes                        |
| Tomm34                   | 654  | 2.31            | chr2       | 163895975 | 163896035 | 833             | 0.02    | 163896255                                             | yes                        |
| Arpc5l                   | 654  | 2.31            | chr2       | 38864630  | 38864690  | 1002            | 0.02    | 38863799; 38863799; 38864031                          | yes                        |
| 1700021F05Rik            | 654  | 2.31            | chr10      | 43260359  | 43260404  | 418             | 0.01    | 43260700; 43260700                                    | yes                        |
| B630019A10Rik            | 654  | 2.31            | chr16      | 23225406  | 23225451  | 594             | 0.01    | 23225406                                              | no                         |
| Ccdc115                  | 655  | 2.3             | chr1       | 34492016  | 34492076  | 4471            | 0.02    | 34492100                                              | yes                        |
| 2900046G09Rik            | 655  | 2.3             | chr16      | 20695572  | 20695632  | 473             | 0.01    | 20695572                                              | no                         |
| Git1                     | 655  | 2.3             | chr11      | 77307608  | 77307653  | 717             | 0.01    | 77307562, 77307438                                    | no                         |
| Rnf139                   | 655  | 2.3             | chr15      | 58721011  | 58721056  | 182             | 0.02    | 58720870, 58721172                                    | no                         |
| Zfp330                   | 656  | 2.29            | chr8       | 85298783  | 85298841  | -787            | 0.02    | 85298783                                              | no                         |
| Ggnbp2                   | 657  | 2.28            | chr11      | 84683595  | 84683761  | 502             | 0.02    | N/A                                                   | no                         |
| Poren                    | 658  | 2.27            | chrX       | 7783641   | 7783687   | -37             | 0.02    | 7783776                                               | yes                        |
| Sh3rf2                   | 658  | 2.27            | chr18      | 42212196  | 42212245  | -1143           | 0.02    | 42212196                                              | no                         |
| Tmem132a                 | 658  | 2.27            | chr19      | 10943282  | 10943338  | 959             | 0.02    | 10943282                                              | no                         |
| Slc37a2                  | 658  | 2.27            | chr9       | 37055602  | 37055656  | 7370            | 0.02    | N/A                                                   | no                         |
| Lzts2                    | 659  | 2.26            | chr19      | 45090397  | 45090451  | -5455           | 0.02    | 45090400                                              | yes                        |
| Zfand3                   | 659  | 2.26            | chr17      | 30141559  | 30141604  | -449            | 0.02    | 30141923                                              | yes                        |
| Rasgrp2                  | 659  | 2.26            | chr19      | 6399998   | 6400043   | -562            | 0.02    | 6399823, 6399812                                      | no                         |
| Lonrf3                   | 660  | 2.25            | chrX       | 33870057  | 33870102  | 1677            | 0.02    | 33870318                                              | yes                        |
| Csdc2                    | 660  | 2.25            | chr15      | 81766993  | 81767048  | -352            | 0.02    | 81766993                                              | no                         |
| Nanos1                   | 660  | 2.25            | chr19      | 60831621  | 60831667  | -245            | 0.02    | 60831621                                              | no                         |
| Ovol1                    | 660  | 2.25            | chr19      | 5558456   | 5558509   | 2093            | 0.02    | 5558456                                               | no                         |
| Sesn3                    | 660  | 2.25            | chr9       | 14081602  | 14081662  | 888             | 0.02    | 14081602                                              | no                         |
| Grina                    | 661  | 2.24            | chr15      | 76077932  | 76077977  | 718             | 0.02    | 76077932                                              | no                         |
| Mybpc2                   | 661  | 2.24            | chr7       | 51780386  | 51780435  | -386            | 0.02    | 51780386                                              | no                         |
| Sh3bp1                   | 662  | 2.23            | chr15      | 78730527  | 78730572  | 335             | 0.02    | N/A                                                   | no                         |
| 0610038D11Rik            | 663  | 2.22            | chr19      | 6984302   | 6984347   | 137             | 0.02    | 6984302                                               | no                         |
| Arhgef2                  | 663  | 2.22            | chr3       | 88424753  | 88425046  | -3              | 0.02    | 88424753                                              | no                         |
| C530043G21Rik            | 664  | 2.21            | chr1       | 158648556 | 158648601 | 463             | 0.02    | 158648556                                             | no                         |
| Pnkd                     | 664  | 2.21            | chr1       | 74331737  | 74331785  | 154             | 0.02    | 74331400, 74331573                                    | no                         |
| Tac2                     | 664  | 2.21            | chr10      | 127158953 | 127159004 | -3469           | 0.02    | 127158953                                             | no                         |
| Timeless                 | 664  | 2.21            | chr10      | 127669131 | 127669176 | -5966           | 0.02    | 127669545; 127669311; 127669545; 127669314            | yes                        |
| Skil                     | 665  | 2.2             | chr3       | 30994640  | 30994685  | 680             | 0.02    | 30994595, 30994571                                    | no                         |
| Pim2                     | 665  | 2.2             | chrX       | 7456020   | 7456072   | 615             | 0.02    | N/A                                                   | no                         |
| Ncdn                     | 666  | 2.19            | chr4       | 126429827 | 126429872 | 841             | 0.02    | 126430113                                             | yes                        |
| Nr2f2                    | 666  | 2.19            | chr7       | 77505956  | 77506001  | -499            | 0.02    | 77506079                                              | yes                        |
| Ddx26b                   | 666  | 2.19            | chrX       | 53707733  | 53707791  | -291            | 0.02    | 53708061                                              | yes                        |
| Xpr1                     | 666  | 2.19            | chr1       | 157264566 | 157264611 | -14             | 0.02    | 157264683; 157264682; 157264791; 157264790            | yes                        |
| Pard6g                   | 666  | 2.19            | chr18      | 80243584  | 80243629  | -96             | 0.02    | 80243723; 80243723                                    | yes                        |
| Nxph3                    | 666  | 2.19            | chr11      | 95375185  | 95375230  | 671             | 0.02    | 95375185                                              | no                         |
| Rmi1                     | 666  | 2.19            | chr13      | 58503739  | 58503784  | 115             | 0.02    | 58503739                                              | no                         |
| Srpk1                    | 666  | 2.19            | chr17      | 28759236  | 28759281  | 141             | 0.02    | 28759189, 28759156, 28759450                          | no                         |
| Stk24                    | 666  | 2.19            | chr14      | 121779021 | 121779066 | -592            | 0.02    | 121778616, 121778558, 121778564, 121778748            | no                         |
| E130319B15Rik            | 667  | 2.18            | chr2       | 4639147   | 4639193   | -20             | 0.02    | 4639365                                               | yes                        |
| Jph4                     | 667  | 2.18            | chr14      | 55735772  | 55735817  | -679            | 0.02    | 55735772                                              | no                         |
| Npr2                     | 667  | 2.18            | chr4       | 43644615  | 43644660  | -168            | 0.02    | 43644615                                              | no                         |
| 2310028H24Rik            | 667  | 2.18            | chr4       | 41516021  | 41516066  | 498             | 0.02    | N/A                                                   | no                         |
| Tle3                     | 667  | 2.18            | chr9       | 61220667  | 61220712  | 518             | 0.02    | N/A                                                   | no                         |
| Prr14                    | 668  | 2.17            | chr7       | 134615244 | 134615289 | 139             | 0.02    | 134615593                                             | yes                        |
| Adams15                  | 669  | 2.16            | chr9       | 30729777  | 30729822  | 237             | 0.02    | 30729777                                              | no                         |
| Tmem166                  | 669  | 2.16            | chr6       | 81991640  | 81991685  | -4              | 0.02    | 81991640                                              | no                         |
| 1500005A01Rik            | 670  | 2.15            | chr14      | 56204072  | 56204117  | -3              | 0.02    | 56204429; 56204428                                    | yes                        |
| Mgat3                    | 670  | 2.15            | chr15      | 80003752  | 80003797  | -376            | 0.02    | 80004133; 80004133; 80004111                          | yes                        |

**Supplemental Table 4. Summary Statistics of WT1 ChIP-chip Peaks and Motif Discovery.**

| Gene          | Rank | Fold-Enrichment | Chromosome | Start     | End       | Distance to TSS | P-Value | Location of WT1 Matrix/Consensus Site                 | WT1 Consensus Site Present |
|---------------|------|-----------------|------------|-----------|-----------|-----------------|---------|-------------------------------------------------------|----------------------------|
| Src           | 670  | 2.15            | chr2       | 157250456 | 157250501 | 450             | 0.02    | 157250403, 157250421                                  | no                         |
| Eps15         | 671  | 2.14            | chr4       | 108953155 | 108953200 | 271             | 0.03    | 108953486; 108953489                                  | yes                        |
| Mageb3        | 671  | 2.14            | chr2       | 121781671 | 121781716 | 134             | 0.02    | 121782338; 121782338; 121782276; 121782006; 121782005 | yes                        |
| Dtnb          | 671  | 2.14            | chr12      | 3572721   | 3572766   | 222             | 0.02    | 3572566, 3572522                                      | no                         |
| Nudt4         | 671  | 2.14            | chr10      | 95025929  | 95025974  | 849             | 0.02    | 95025929                                              | no                         |
| Gpr146        | 671  | 2.14            | chr5       | 139857004 | 139857050 | -8830           | 0.02    | N/A                                                   | no                         |
| Ubl3          | 672  | 2.13            | chr5       | 149364038 | 149364083 | 304             | 0.03    | 149364410; 149364409                                  | yes                        |
| Zfp668        | 672  | 2.13            | chr7       | 135020107 | 135020152 | 207             | 0.03    | 135020346; 135020346                                  | yes                        |
| Abcd2         | 672  | 2.13            | chr15      | 91022148  | 91022201  | 64              | 0.02    | 91022484; 91022484                                    | yes                        |
| Foxg1         | 672  | 2.13            | chr12      | 50485979  | 50486024  | 2009            | 0.02    | 50485979                                              | no                         |
| Ptgir         | 672  | 2.13            | chr7       | 17491240  | 17491290  | -573            | 0.02    | 17491240                                              | no                         |
| Scyl3         | 672  | 2.13            | chr1       | 165859586 | 165859646 | -578            | 0.02    | 165859586                                             | no                         |
| Palm          | 673  | 2.12            | chr10      | 79256745  | 79256790  | 308             | 0.02    | 79256745                                              | no                         |
| Faf1          | 674  | 2.11            | chr4       | 109349260 | 109349305 | 51              | 0.03    | 109349397; 109349397; 109349421; 109349421            | yes                        |
| Fn3k          | 674  | 2.11            | chr11      | 121296260 | 121296305 | -3              | 0.02    | 121296205, 121296250, 121296098                       | no                         |
| Oxct1         | 674  | 2.11            | chr15      | 3977736   | 3977792   | 1337            | 0.02    | 3977736                                               | no                         |
| Vasp          | 674  | 2.11            | chr7       | 19857388  | 19857446  | -214            | 0.03    | N/A                                                   | no                         |
| Actr10        | 675  | 2.1             | chr12      | 72039245  | 72039290  | 375             | 0.02    | 72039245                                              | no                         |
| Ankrd25       | 675  | 2.1             | chr9       | 21602380  | 21602425  | 588             | 0.03    | 21602380                                              | no                         |
| Cnmm4         | 676  | 2.09            | chr1       | 36528307  | 36528352  | -111            | 0.03    | 36528679                                              | yes                        |
| Unc13a        | 676  | 2.09            | chr8       | 74195045  | 74195090  | 478             | 0.03    | 74195459                                              | yes                        |
| Wbscr27       | 676  | 2.09            | chr5       | 135408558 | 135408603 | 338             | 0.03    | 135408719; 135408718                                  | yes                        |
| Fbxo6         | 676  | 2.09            | chr4       | 147524933 | 147524993 | 1054            | 0.03    | 147524933                                             | no                         |
| Jph1          | 676  | 2.09            | chr1       | 17087383  | 17087428  | 473             | 0.03    | 17087383                                              | no                         |
| BC021523      | 677  | 2.08            | chr15      | 85889266  | 85889311  | 1152            | 0.03    | 85889430; 85889429                                    | yes                        |
| BC046404      | 677  | 2.08            | chr11      | 62462072  | 62462117  | -69             | 0.02    | 62462208; 62462347; 62462208; 62462350                | yes                        |
| Pknox2        | 677  | 2.08            | chr9       | 36953462  | 36953512  | 1364            | 0.02    | 36953462                                              | no                         |
| Slc8a2        | 677  | 2.08            | chr7       | 16715197  | 16715242  | -428            | 0.03    | 16715197                                              | no                         |
| Cdk5r1        | 678  | 2.07            | chr11      | 80291109  | 80291154  | 585             | 0.02    | 80291304, 80290971                                    | no                         |
| Fbxl10        | 678  | 2.07            | chr5       | 123438549 | 123438594 | -30             | 0.03    | 123438526, 123438352                                  | no                         |
| Ormdl3        | 679  | 2.06            | chr11      | 98449721  | 98449766  | -1185           | 0.03    | 98449771, 98449777                                    | no                         |
| Rab38         | 679  | 2.06            | chr7       | 95578501  | 95578551  | -256            | 0.03    | 95578501                                              | no                         |
| B230317C12Rik | 679  | 2.06            | chr2       | 26483394  | 26483447  | -556            | 0.03    | N/A                                                   | no                         |
| 0610010K14Rik | 680  | 2.05            | chr11      | 70051050  | 70051095  | 344             | 0.03    | 70051050                                              | no                         |
| Tmem35        | 680  | 2.05            | chrX       | 130829983 | 130830028 | 243             | 0.03    | 130829983                                             | no                         |
| Chd1          | 681  | 2.04            | chr17      | 15841675  | 15841720  | -555            | 0.03    | 15842040; 15842043                                    | yes                        |
| Myen          | 681  | 2.04            | chr12      | 12947500  | 12947546  | 1119            | 0.03    | 12947500                                              | no                         |
| Tgfb3         | 681  | 2.04            | chr12      | 87418005  | 87418060  | 1452            | 0.03    | 87418005                                              | no                         |
| Crtc2         | 682  | 2.03            | chr3       | 90058505  | 90058550  | 311             | 0.03    | 90058741                                              | yes                        |
| Ube2e1        | 682  | 2.03            | chr14      | 19164414  | 19164459  | -78             | 0.03    | 19164592                                              | yes                        |
| Glrx          | 682  | 2.03            | chr13      | 75977775  | 75977820  | 465             | 0.03    | 75977775                                              | no                         |
| Itgb1         | 682  | 2.03            | chr8       | 131209308 | 131209353 | -350            | 0.03    | 131209308                                             | no                         |
| Mmp14         | 683  | 2.02            | chr14      | 55050322  | 55050377  | -105            | 0.03    | 55050617; 55050617; 55050623                          | yes                        |
| Dynl1         | 683  | 2.02            | chr5       | 115749703 | 115749763 | 1210            | 0.03    | 115749703                                             | no                         |
| Slc29a2       | 683  | 2.02            | chr19      | 5023854   | 5023899   | -2229           | 0.03    | 5023854                                               | no                         |
| Uap1          | 683  | 2.02            | chr1       | 172105270 | 172105315 | -215            | 0.03    | 172105228, 172105206, 172105222                       | no                         |
| Dab1          | 684  | 2.01            | chr4       | 104039835 | 104039880 | -306            | 0.03    | 104040123                                             | yes                        |
| Abec4         | 685  | 2               | chr14      | 119105539 | 119105584 | -135            | 0.03    | 119105910; 119105933                                  | yes                        |
| Gdf10         | 685  | 2               | chr14      | 34736672  | 34736717  | -78             | 0.03    | 34736761                                              | yes                        |
| Pepd          | 685  | 2               | chr7       | 35695580  | 35695627  | -1821           | 0.03    | 35695768; 35695768                                    | yes                        |
| Nfib          | 685  | 2               | chr4       | 82153048  | 82153102  | -1863           | 0.03    | 82153048                                              | no                         |
| Pdzd3         | 685  | 2               | chr9       | 44058602  | 44058647  | 923             | 0.03    | 44058602                                              | no                         |
| Stac3         | 685  | 2               | chr10      | 126947580 | 126947625 | -4392           | 0.03    | N/A                                                   | no                         |
| BC018371      | 686  | 1.99            | chr11      | 94463254  | 94463299  | -176            | 0.03    | 94463254                                              | no                         |
| Mapt          | 686  | 1.99            | chr11      | 104094269 | 104094320 | 1545            | 0.03    | 104094269                                             | no                         |
| Rab11fip5     | 686  | 1.99            | chr6       | 85324150  | 85324195  | 456             | 0.03    | 85324150                                              | no                         |
| Pnmt          | 686  | 1.99            | chr11      | 98249630  | 98249675  | 1707            | 0.03    | N/A                                                   | no                         |
| Foxp4         | 687  | 1.98            | chr17      | 48059926  | 48059971  | 1633            | 0.03    | 48059926                                              | no                         |

**Supplemental Table 4. Summary Statistics of WT1 ChIP-chip Peaks and Motif Discovery.**

| Gene                  | Rank | Fold-Enrichment | Chromosome | Start     | End       | Distance to TSS | P-Value | Location of WT1 Matrix/Consensus Site            | WT1 Consensus Site Present |
|-----------------------|------|-----------------|------------|-----------|-----------|-----------------|---------|--------------------------------------------------|----------------------------|
| Slc41a3               | 687  | 1.98            | chr6       | 90571491  | 90571545  | 2309            | 0.03    | 90571491                                         | no                         |
| Diras2                | 688  | 1.97            | chr13      | 52625649  | 52625697  | 532             | 0.03    | 52625649                                         | no                         |
| Ssfa2                 | 688  | 1.97            | chr2       | 79475980  | 79476025  | 306             | 0.04    | N/A                                              | no                         |
| Prkar1b               | 689  | 1.96            | chr5       | 139605206 | 139605251 | 417             | 0.04    | 139605206                                        | no                         |
| Arhgap8               | 689  | 1.96            | chr15      | 84512032  | 84512077  | 627             | 0.03    | N/A                                              | no                         |
| Zfp161                | 690  | 1.95            | chr17      | 69732893  | 69732938  | -401            | 0.04    | 69733278; 69733281; 69733236                     | yes                        |
| Brsk1                 | 691  | 1.94            | chr7       | 4642903   | 4642948   | 397             | 0.04    | 4643042; 4643042; 4642913                        | yes                        |
| Sirt5                 | 691  | 1.94            | chr13      | 43461294  | 43461339  | -4768           | 0.03    | 43461294                                         | no                         |
| Zfp574                | 691  | 1.94            | chr7       | 25862319  | 25862364  | 40              | 0.04    | 25858024, 25857809, 25858022, 25857997           | no                         |
| Dnajb10               | 692  | 1.93            | chr1       | 75233022  | 75233067  | -17             | 0.04    | 75233177; 75233165                               | yes                        |
| 6330505N24Rik         | 692  | 1.93            | chr3       | 84283948  | 84283993  | 381             | 0.04    | 84283948                                         | no                         |
| Spred2                | 692  | 1.93            | chr11      | 19823978  | 19824025  | -442            | 0.04    | 19823978                                         | no                         |
| Kdelc1                | 692  | 1.93            | chr1       | 44158703  | 44158762  | 16886           | 0.04    | N/A                                              | no                         |
| E130114P18Rik         | 693  | 1.92            | chr4       | 97444652  | 97444697  | 358             | 0.04    | 97444895                                         | yes                        |
| Nr4a1                 | 693  | 1.92            | chr15      | 101097227 | 101097272 | -42             | 0.04    | 101097416                                        | yes                        |
| Pgrmc1                | 693  | 1.92            | chrX       | 34138703  | 34138748  | 507             | 0.04    | 34138701, 34138681                               | no                         |
| 5730442P18Rik         | 693  | 1.92            | chr11      | 103225340 | 103225390 | -667            | 0.04    | N/A                                              | no                         |
| Sorcs1                | 694  | 1.91            | chr19      | 50752933  | 50752978  | 146             | 0.04    | 50752947; 50753294; 50753294                     | yes                        |
| 4930412M03Rik         | 694  | 1.91            | chr11      | 59928402  | 59928452  | 9913            | 0.04    | 59928402                                         | no                         |
| X99384                | 694  | 1.91            | chr10      | 60845390  | 60845435  | 859             | 0.04    | 60845390                                         | no                         |
| Lgr6                  | 695  | 1.9             | chr1       | 137001675 | 137001720 | 155             | 0.04    | 137002037                                        | yes                        |
| Bin1                  | 695  | 1.9             | chr18      | 32537327  | 32537372  | 480             | 0.04    | 32537703                                         | yes                        |
| Cdkn1c                | 695  | 1.9             | chr7       | 150647382 | 150647431 | -505            | 0.04    | 150647234, 150647215, 150647240, 150647241       | no                         |
| Tax1bp3               | 695  | 1.9             | chr11      | 72991021  | 72991066  | 460             | 0.04    | 72991021                                         | no                         |
| Tbx3                  | 695  | 1.9             | chr5       | 120120713 | 120120758 | 59              | 0.04    | 120120713                                        | no                         |
| Zfp3                  | 695  | 1.9             | chr11      | 70577737  | 70577782  | -188            | 0.04    | 70577737                                         | no                         |
| Vti1b                 | 696  | 1.89            | chr12      | 80273135  | 80273180  | 206             | 0.04    | 80273392; 80273507; 80273507                     | yes                        |
| Slc35e1               | 696  | 1.89            | chr8       | 75016979  | 75017026  | -489            | 0.04    | 75016979                                         | no                         |
| Fxyd5                 | 697  | 1.88            | chr7       | 31827214  | 31827259  | -399            | 0.05    | 31827185, 31827147                               | no                         |
| Mbc2                  | 697  | 1.88            | chr10      | 127962196 | 127962241 | 697             | 0.04    | 127962196                                        | no                         |
| Plekhh3               | 697  | 1.88            | chr11      | 101032141 | 101032186 | 452             | 0.04    | 101032141                                        | no                         |
| Tbcd1f6               | 698  | 1.87            | chr11      | 119089660 | 119089705 | 131             | 0.04    | 119090040; 119089742; 119090032; 119090031       | yes                        |
| Lrrc4                 | 698  | 1.87            | chr6       | 28782622  | 28782667  | -897            | 0.05    | 28782687, 28782705, 28782681, 28782740, 28782592 | no                         |
| ENSMUST0000008358.2.1 | 698  | 1.87            | chr1       | 164147100 | 164147151 | 261035          | 0.05    | N/A                                              | no                         |
| Larp6                 | 699  | 1.86            | chr9       | 60560773  | 60560818  | -131            | 0.04    | 60561140; 60561031                               | yes                        |
| Slc25a37              | 699  | 1.86            | chr14      | 69902684  | 69902729  | 454             | 0.04    | 69902684                                         | no                         |
| Ccnt2                 | 700  | 1.85            | chr1       | 129671054 | 129671100 | 337             | 0.05    | 129671054                                        | no                         |
| Galnt2                | 700  | 1.85            | chr8       | 126755926 | 126755971 | 655             | 0.05    | 126755926                                        | no                         |
| Ppap2b                | 700  | 1.85            | chr4       | 104830209 | 104830254 | 281             | 0.05    | 104830209                                        | no                         |
| Ddr1                  | 700  | 1.85            | chr17      | 35841379  | 35841434  | -322            | 0.04    | N/A                                              | no                         |
| Gtf2i                 | 700  | 1.85            | chr5       | 134790010 | 134790055 | 584             | 0.05    | N/A                                              | no                         |
| Syn2                  | 701  | 1.84            | chr6       | 115084796 | 115084841 | -101            | 0.05    | 115085078; 115085078                             | yes                        |
| Ak3l1                 | 701  | 1.84            | chr4       | 101092775 | 101092820 | 435             | 0.05    | 101092745, 101092671                             | no                         |
| Rap2a                 | 701  | 1.84            | chr14      | 120877052 | 120877097 | -608            | 0.05    | 120877052                                        | no                         |
| Zfp53                 | 701  | 1.84            | chr17      | 21625888  | 21625933  | -41             | 0.05    | 21625888                                         | no                         |
| Ap1s3                 | 701  | 1.84            | chr1       | 79668400  | 79668445  | 125             | 0.05    | N/A                                              | no                         |
| Chrd                  | 702  | 1.83            | chr16      | 20732670  | 20732715  | -507            | 0.05    | 20732670                                         | no                         |
| Rorc                  | 702  | 1.83            | chr3       | 94177233  | 94177278  | 549             | 0.06    | 94177233                                         | no                         |
| Skap2                 | 703  | 1.82            | chr6       | 51962155  | 51962200  | 370             | 0.05    | 51962491                                         | yes                        |
| Yeats4                | 703  | 1.82            | chr10      | 116661501 | 116661546 | 5               | 0.05    | 116661748                                        | yes                        |
| Anp32b                | 703  | 1.82            | chr4       | 46465201  | 46465246  | 1236            | 0.05    | 46465201                                         | no                         |
| C130026L21Rik         | 703  | 1.82            | chr5       | 112010630 | 112010686 | -106            | 0.05    | 112010630                                        | no                         |
| Fbxw7                 | 703  | 1.82            | chr3       | 84756093  | 84756143  | -14             | 0.05    | 84756093                                         | no                         |
| C1qdc2                | 704  | 1.81            | chr4       | 155336917 | 155336962 | 514             | 0.06    | 155336917                                        | no                         |
| Kctd9                 | 704  | 1.81            | chr14      | 68334564  | 68334609  | 432             | 0.05    | 68334450, 68334378, 68334293, 68334316           | no                         |
| Sema6a                | 704  | 1.81            | chr18      | 47528068  | 47528115  | 430             | 0.05    | 47528068                                         | no                         |
| Tmem126b              | 705  | 1.8             | chr7       | 97624417  | 97624462  | 65              | 0.05    | 97624417                                         | no                         |

**Supplemental Table 4. Summary Statistics of WT1 ChIP-chip Peaks and Motif Discovery.**

| Gene          | Rank | Fold-Enrichment | Chromosome | Start     | End       | Distance to TSS | P-Value | Location of WT1 Matrix/Consensus Site                      | WT1 Consensus Site Present |
|---------------|------|-----------------|------------|-----------|-----------|-----------------|---------|------------------------------------------------------------|----------------------------|
| Jundm2        | 706  | 1.79            | chr12      | 86939998  | 86940043  | -345            | 0.05    | 86940362; 86940322                                         | yes                        |
| Eda           | 706  | 1.79            | chrX       | 97170352  | 97170399  | -568            | 0.05    | 97170352                                                   | no                         |
| Fxyd6         | 706  | 1.79            | chr9       | 45178515  | 45178560  | 271             | 0.05    | 45178515                                                   | no                         |
| Mrp155        | 706  | 1.79            | chr11      | 59015808  | 59015853  | -188            | 0.05    | 59015808                                                   | no                         |
| Oxr1          | 706  | 1.79            | chr15      | 41620566  | 41620611  | -472            | 0.05    | 41620654; 41620497                                         | no                         |
| Trappc5       | 706  | 1.79            | chr8       | 3672225   | 3672270   | -4228           | 0.06    | 3672225                                                    | no                         |
| Mfn1          | 707  | 1.77            | chr3       | 32428792  | 32428852  | 415             | 0.06    | 32428876; 32428875                                         | yes                        |
| Gm71          | 707  | 1.77            | chr12      | 70683994  | 70684039  | -1              | 0.05    | 70684216; 70684215; 70684215                               | yes                        |
| Dock4         | 708  | 1.76            | chr12      | 41173034  | 41173079  | 417             | 0.06    | 41173034                                                   | no                         |
| Cggbp1        | 709  | 1.75            | chr16      | 64851125  | 64851170  | -762            | 0.06    | 64851344; 64851329; 64851040                               | no                         |
| Nkx6-1        | 709  | 1.75            | chr5       | 102094435 | 102094480 | -728            | 0.06    | 102094435                                                  | no                         |
| 1700012A16Rik | 710  | 1.74            | chr1       | 155271882 | 155271935 | -430            | 0.07    | 155272469; 155272444                                       | yes                        |
| Col13a1       | 710  | 1.74            | chr10      | 61441987  | 61442032  | -154            | 0.06    | 61442140; 61442139                                         | yes                        |
| Grtp1         | 710  | 1.74            | chr8       | 13199869  | 13199915  | 732             | 0.07    | 13200038                                                   | yes                        |
| Usf2          | 710  | 1.74            | chr7       | 31741410  | 31741455  | 366             | 0.07    | 31741410                                                   | no                         |
| Pan3          | 711  | 1.73            | chr5       | 148241873 | 148241918 | -568            | 0.07    | 148241873                                                  | no                         |
| Lbx2          | 712  | 1.72            | chr6       | 83034247  | 83034298  | -2086           | 0.07    | 83034247                                                   | no                         |
| Ehbp1         | 713  | 1.7             | chr11      | 22186735  | 22186780  | -917            | 0.07    | 22187168                                                   | yes                        |
| Hspb8         | 714  | 1.68            | chr5       | 116873217 | 116873267 | -369            | 0.08    | 116873295; 116873298                                       | yes                        |
| Card10        | 714  | 1.68            | chr15      | 78634102  | 78634150  | -654            | 0.07    | 78634102                                                   | no                         |
| Lrrc8d        | 714  | 1.68            | chr5       | 106128040 | 106128095 | -919            | 0.08    | 106128040                                                  | no                         |
| Cnot4         | 715  | 1.67            | chr6       | 35083695  | 35083740  | -3              | 0.08    | 35083380; 35083388                                         | no                         |
| Trim46        | 715  | 1.67            | chr3       | 89047691  | 89047736  | 1407            | 0.08    | 89047691                                                   | no                         |
| Gprc5a        | 716  | 1.65            | chr6       | 135015349 | 135015394 | -335            | 0.08    | 135015349                                                  | no                         |
| Prkch         | 717  | 1.62            | chr12      | 74685598  | 74685643  | -407            | 0.08    | 74685943; 74685943                                         | yes                        |
| Slc35f2       | 717  | 1.62            | chr9       | 53619543  | 53619588  | 225             | 0.08    | 53619630; 53619630                                         | yes                        |
| Etv5          | 718  | 1.6             | chr16      | 22439533  | 22439578  | 87              | 0.09    | 22439672; 22439620; 22439619                               | yes                        |
| Wnt11         | 718  | 1.6             | chr7       | 105986752 | 105986802 | -577            | 0.1     | 105986763                                                  | yes                        |
| Pank1         | 719  | 1.59            | chr19      | 34953561  | 34953606  | -1177           | 0.09    | 34953640; 34953551                                         | no                         |
| Mareks11      | 720  | 1.57            | chr4       | 129191319 | 129191365 | 455             | 0.11    | 129191471                                                  | yes                        |
| BC079880      | 720  | 1.57            | chr8       | 108130344 | 108130389 | 1238            | 0.1     | N/A                                                        | no                         |
| B3galnt2      | 721  | 1.53            | chr13      | 14047084  | 14047129  | 166             | 0.11    | 14047168; 14047089                                         | yes                        |
| Hip1r         | 722  | 1.51            | chr5       | 124423962 | 124424007 | 337             | 0.13    | 124423888; 124423894                                       | no                         |
| Ece1          | 723  | 1.49            | chr4       | 137417821 | 137417866 | -367            | 0.13    | 137417821                                                  | no                         |
| Btbd12        | 724  | 1.45            | chr16      | 4003484   | 4003529   | -1826           | 0.14    | 4003885                                                    | yes                        |
| Lass5         | 725  | 1.44            | chr15      | 99603245  | 99603290  | -322            | 0.14    | 99603245                                                   | no                         |
| Antxr2        | 726  | 1.43            | chr5       | 98459520  | 98459565  | 439             | 0.15    | 98459520-98459565                                          | no                         |
| B3galnt4      | 726  | 1.43            | chr17      | 34088230  | 34088275  | 181             | 0.15    | 34088230-34088275                                          | no                         |
| 4121402D02Rik | 727  | 1.37            | chr11      | 98656629  | 98656674  | -430            | 0.18    | 98656763; 98656521; 98656587; 98656757; 98656621; 98656845 | no                         |
