# Supplementary material for: Genomic characterization of Wilms' tumor suppressor 1 targets in nephron progenitor cells during kidney development
Source: Oxford University Press journal article supplement (doi:10.1242/dev.045732), 2010-03-09
Supplement: dev045732tables5.pdf [file dev045732tables5.pdf]

**Supplemental Table 5. Functional Mapping of WT1 Target Genes using DAVID.**

| Functional Group | Enrichment Score                              | Median P-Value | Geometric Mean | Category        | Term                                                                                                    | Count    | % of Total | P-Value       | Bonferroni                                         | Benjamini | FDR      | Information Content (bits) |          |          |          |      |
|------------------|-----------------------------------------------|----------------|----------------|-----------------|---------------------------------------------------------------------------------------------------------|----------|------------|---------------|----------------------------------------------------|-----------|----------|----------------------------|----------|----------|----------|------|
| 1                | 20.43                                         | 8.64E-22       | 3.70E-21       | SP_PIR_KEYWORDS | Transcription regulation                                                                                | 216      | 13.4%      | 1.06E-24      | 9.18E-22                                           | 4.59E-22  | 1.64E-21 | 3.80                       |          |          |          |      |
|                  |                                               |                |                | GOTERM_BP_ALL   | GO:0006355~regulation of transcription, DNA-dependent                                                   | 308      | 19.1%      | 1.76E-23      | 9.15E-20                                           | 1.14E-20  | 3.37E-20 | 3.19                       |          |          |          |      |
|                  |                                               |                |                | GOTERM_BP_ALL   | GO:0006351~transcription, DNA-dependent                                                                 | 308      | 19.1%      | 1.12E-22      | 5.80E-19                                           | 5.28E-20  | 2.14E-19 | 3.17                       |          |          |          |      |
|                  |                                               |                |                | GOTERM_BP_ALL   | GO:0019219~regulation of nucleobase, nucleoside, nucleotide and nucleic acid metabolic process          | 321      | 19.9%      | 1.43E-22      | 7.42E-19                                           | 6.18E-20  | 2.73E-19 | 3.05                       |          |          |          |      |
|                  |                                               |                |                | SP_PIR_KEYWORDS | Transcription                                                                                           | 213      | 13.2%      | 1.50E-22      | 1.30E-19                                           | 4.35E-20  | 2.33E-19 | 3.63                       |          |          |          |      |
|                  |                                               |                |                | GOTERM_BP_ALL   | GO:0032774~RNA biosynthetic process                                                                     | 308      | 19.1%      | 1.61E-22      | 8.35E-19                                           | 6.42E-20  | 3.07E-19 | 3.17                       |          |          |          |      |
|                  |                                               |                |                | GOTERM_MF_ALL   | GO:0030528~transcription regulator activity                                                             | 208      | 12.9%      | 1.82E-22      | 4.92E-19                                           | 1.64E-19  | 3.24E-19 | 3.89                       |          |          |          |      |
|                  |                                               |                |                | GOTERM_BP_ALL   | GO:0045449~regulation of transcription                                                                  | 314      | 19.5%      | 8.64E-22      | 4.49E-18                                           | 2.80E-19  | 1.65E-18 | 3.11                       |          |          |          |      |
|                  |                                               |                |                | GOTERM_BP_ALL   | GO:0006350~transcription                                                                                | 318      | 19.7%      | 1.08E-20      | 5.61E-17                                           | 2.95E-18  | 2.06E-17 | 3.06                       |          |          |          |      |
|                  |                                               |                |                | GOTERM_MF_ALL   | GO:0003677~DNA binding                                                                                  | 278      | 17.3%      | 7.11E-19      | 1.92E-15                                           | 4.81E-16  | 1.27E-15 | 3.26                       |          |          |          |      |
|                  |                                               |                |                | SP_PIR_KEYWORDS | dna-binding                                                                                             | 204      | 12.7%      | 8.89E-18      | 7.70E-15                                           | 1.93E-15  | 1.38E-14 | 3.75                       |          |          |          |      |
|                  |                                               |                |                | GOTERM_MF_ALL   | GO:0003700~transcription factor activity                                                                | 151      | 9.4%       | 2.23E-16      | 6.01E-13                                           | 1.20E-13  | 4.00E-13 | 4.38                       |          |          |          |      |
|                  |                                               |                |                | 2               | 16.11                                                                                                   | 2.87E-14 | 7.82E-17   | GOTERM_BP_ALL | GO:0048856~anatomical structure development        | 292       | 18.1%    | 2.91E-23                   | 1.51E-19 | 1.68E-20 | 5.57E-20 | 3.20 |
|                  |                                               |                |                |                 |                                                                                                         |          |            | GOTERM_BP_ALL | GO:0007275~multicellular organismal development    | 313       | 19.4%    | 4.93E-23                   | 2.56E-19 | 2.56E-20 | 9.42E-20 | 3.06 |
| GOTERM_BP_ALL    | GO:0048731~system development                 | 257            | 15.9%          |                 |                                                                                                         |          |            | 2.17E-22      | 1.13E-18                                           | 8.06E-20  | 4.15E-19 | 3.41                       |          |          |          |      |
| GOTERM_BP_ALL    | GO:0009653~anatomical structure morphogenesis | 194            | 12.0%          |                 |                                                                                                         |          |            | 1.06E-21      | 5.48E-18                                           | 3.22E-19  | 2.02E-18 | 3.92                       |          |          |          |      |
| GOTERM_BP_ALL    | GO:0007399~nervous system development         | 121            | 7.5%           |                 |                                                                                                         |          |            | 8.82E-17      | 5.76E-13                                           | 2.51E-14  | 2.11E-13 | 4.76                       |          |          |          |      |
| GOTERM_BP_ALL    | GO:0048869~cellular developmental process     | 240            | 14.9%          |                 |                                                                                                         |          |            | 5.74E-14      | 2.98E-10                                           | 1.03E-11  | 1.10E-10 | 3.17                       |          |          |          |      |
| GOTERM_BP_ALL    | GO:0030154~cell differentiation               | 240            | 14.9%          |                 |                                                                                                         |          |            | 5.74E-14      | 2.98E-10                                           | 1.03E-11  | 1.10E-10 | 3.32                       |          |          |          |      |
| GOTERM_BP_ALL    | GO:0009887~organ morphogenesis                | 97             | 6.0%           |                 |                                                                                                         |          |            | 5.76E-14      | 2.99E-10                                           | 9.97E-12  | 1.10E-10 | 4.77                       |          |          |          |      |
| GOTERM_BP_ALL    | GO:0048513~organ development                  | 194            | 12.0%          |                 |                                                                                                         |          |            | 2.25E-13      | 1.17E-09                                           | 3.66E-11  | 4.31E-10 | 3.68                       |          |          |          |      |
| GOTERM_BP_ALL    | GO:0048468~cell development                   | 173            | 10.7%          |                 |                                                                                                         |          |            | 7.73E-13      | 4.02E-09                                           | 1.15E-10  | 1.48E-09 | 3.91                       |          |          |          |      |
| 3                | 9.66                                          | 2.94E-10       | 2.21E-10       |                 |                                                                                                         |          |            | GOTERM_BP_ALL | GO:0048522~positive regulation of cellular process | 143       | 8.9%     | 5.07E-15                   | 2.65E-11 | 1.02E-12 | 9.76E-12 | 4.26 |
|                  |                                               |                |                | GOTERM_BP_ALL   | GO:0048518~positive regulation of biological process                                                    | 150      | 9.3%       | 1.26E-12      | 6.55E-09                                           | 1.77E-10  | 2.41E-09 | 4.11                       |          |          |          |      |
|                  |                                               |                |                | GOTERM_BP_ALL   | GO:0045941~positive regulation of transcription                                                         | 68       | 4.2%       | 6.39E-12      | 3.32E-08                                           | 8.29E-10  | 1.22E-08 | 5.76                       |          |          |          |      |
|                  |                                               |                |                | GOTERM_BP_ALL   | GO:0045935~positive regulation of nucleobase, nucleoside, nucleotide and nucleic acid metabolic process | 68       | 4.2%       | 1.93E-11      | 1.00E-07                                           | 2.39E-09  | 3.69E-08 | 5.71                       |          |          |          |      |
|                  |                                               |                |                | GOTERM_BP_ALL   | GO:0006366~transcription from RNA polymerase II promoter                                                | 80       | 5.0%       | 2.69E-10      | 1.40E-06                                           | 3.04E-08  | 5.15E-07 | 5.30                       |          |          |          |      |
|                  |                                               |                |                | GOTERM_BP_ALL   | GO:0006357~regulation of transcription from RNA polymerase II promoter                                  | 74       | 4.6%       | 2.94E-10      | 1.52E-06                                           | 3.18E-08  | 5.61E-07 | 5.45                       |          |          |          |      |
|                  |                                               |                |                | GOTERM_BP_ALL   | GO:0031325~positive regulation of cellular metabolic process                                            | 75       | 4.7%       | 3.99E-10      | 2.07E-06                                           | 4.23E-08  | 7.62E-07 | 5.35                       |          |          |          |      |
|                  |                                               |                |                | GOTERM_BP_ALL   | GO:0009893~positive regulation of metabolic process                                                     | 77       | 4.8%       | 1.07E-09      | 5.57E-06                                           | 1.07E-07  | 2.05E-06 | 5.30                       |          |          |          |      |
|                  |                                               |                |                | GOTERM_BP_ALL   | GO:0045893~positive regulation of transcription, DNA-dependent                                          | 54       | 3.4%       | 5.60E-09      | 2.91E-05                                           | 5.19E-07  | 1.07E-05 | 6.04                       |          |          |          |      |
|                  |                                               |                |                | GOTERM_BP_ALL   | GO:0045944~positive regulation of transcription from RNA polymerase II promoter                         | 45       | 2.8%       | 1.48E-08      | 7.69E-05                                           | 1.35E-06  | 2.83E-05 | 6.40                       |          |          |          |      |
|                  |                                               |                |                | GOTERM_MF_ALL   | GO:0016563~transcription activator activity                                                             | 37       | 2.3%       | 2.77E-05      | 0.072                                              | 0.005     | 0.049    | 6.43                       |          |          |          |      |
| 4                | 7.75                                          | 2.84E-07       | 1.79E-08       | GOTERM_BP_ALL   | GO:0022008~neurogenesis                                                                                 | 76       | 4.7%       | 1.86E-13      | 9.67E-10                                           | 3.12E-11  | 3.56E-10 | 5.52                       |          |          |          |      |
|                  |                                               |                |                | GOTERM_BP_ALL   | GO:0048699~generation of neurons                                                                        | 71       | 4.4%       | 7.76E-13      | 4.03E-09                                           | 1.12E-10  | 1.48E-09 | 5.60                       |          |          |          |      |
|                  |                                               |                |                | GOTERM_BP_ALL   | GO:0030182~neuron differentiation                                                                       | 65       | 4.0%       | 1.37E-12      | 7.11E-09                                           | 1.87E-10  | 2.62E-09 | 5.77                       |          |          |          |      |
|                  |                                               |                |                | GOTERM_BP_ALL   | GO:0032989~cellular structure morphogenesis                                                             | 89       | 5.5%       | 1.07E-10      | 5.56E-07                                           | 1.26E-08  | 2.05E-07 | 5.04                       |          |          |          |      |
|                  |                                               |                |                | GOTERM_BP_ALL   | GO:0000902~cell morphogenesis                                                                           | 89       | 5.5%       | 1.07E-10      | 5.56E-07                                           | 1.26E-08  | 2.05E-07 | 5.13                       |          |          |          |      |
|                  |                                               |                |                | GOTERM_BP_ALL   | GO:0048666~neuron development                                                                           | 51       | 3.2%       | 5.81E-10      | 3.02E-06                                           | 6.04E-08  | 1.11E-06 | 6.21                       |          |          |          |      |
|                  |                                               |                |                | GOTERM_BP_ALL   | GO:0016477~cell migration                                                                               | 59       | 3.7%       | 6.92E-10      | 3.59E-06                                           | 7.05E-08  | 1.32E-06 | 5.99                       |          |          |          |      |
|                  |                                               |                |                | GOTERM_BP_ALL   | GO:0006928~cell motility                                                                                | 65       | 4.0%       | 3.81E-09      | 1.98E-05                                           | 3.74E-07  | 7.29E-06 | 5.72                       |          |          |          |      |
|                  |                                               |                |                | GOTERM_BP_ALL   | GO:0051674~localization of cell                                                                         | 65       | 4.0%       | 3.81E-09      | 1.98E-05                                           | 3.74E-07  | 7.29E-06 | 5.72                       |          |          |          |      |
|                  |                                               |                |                | GOTERM_BP_ALL   | GO:0031175~neurite development                                                                          | 41       | 2.5%       | 5.64E-07      | 0.003                                              | 4.37E-05  | 0.001    | 6.53                       |          |          |          |      |
|                  |                                               |                |                | GOTERM_BP_ALL   | GO:0032990~cell part morphogenesis                                                                      | 51       | 3.2%       | 7.54E-07      | 0.004                                              | 5.60E-05  | 0.001    | 5.94                       |          |          |          |      |
|                  |                                               |                |                | GOTERM_BP_ALL   | GO:0048858~cell projection morphogenesis                                                                | 51       | 3.2%       | 7.54E-07      | 0.004                                              | 5.60E-05  | 0.001    | 5.98                       |          |          |          |      |
|                  |                                               |                |                | GOTERM_BP_ALL   | GO:0030030~cell projection organization and biogenesis                                                  | 51       | 3.2%       | 7.54E-07      | 0.004                                              | 5.60E-05  | 0.001    | 5.98                       |          |          |          |      |
|                  |                                               |                |                | GOTERM_BP_ALL   | GO:0007411~axon guidance                                                                                | 22       | 1.4%       | 6.27E-06      | 0.032                                              | 3.87E-04  | 0.012    | 7.89                       |          |          |          |      |
|                  |                                               |                |                | GOTERM_BP_ALL   | GO:0007409~axonogenesis                                                                                 | 32       | 2.0%       | 1.89E-05      | 0.094                                              | 0.001     | 0.036    | 6.87                       |          |          |          |      |
|                  |                                               |                |                | GOTERM_BP_ALL   | GO:0000904~cellular morphogenesis during differentiation                                                | 36       | 2.2%       | 2.22E-05      | 0.109                                              | 0.001     | 0.042    | 6.54                       |          |          |          |      |
|                  |                                               |                |                | GOTERM_BP_ALL   | GO:0048812~neurite morphogenesis                                                                        | 32       | 2.0%       | 6.62E-05      | 0.291                                              | 0.003     | 0.126    | 6.77                       |          |          |          |      |
|                  |                                               |                |                | GOTERM_BP_ALL   | GO:0048667~neuron morphogenesis during differentiation                                                  | 32       | 2.0%       | 6.62E-05      | 0.291                                              | 0.003     | 0.126    | 6.77                       |          |          |          |      |

The DAVID Functional Annotation tool identified 64 functional groups enriched in WT1 bound genes. Geometric means for each functional group were negative log-transformed to generate an enrichment score which ranks each functional group by overall importance (enrichment). The absolute (count) and relative frequency (% of total) of each term within a given functional group is given, together with its associated P-Value and information content. Multiple testing correction techniques were applied to control family-wise error rate (Bonferroni) and false discovery rate (FDR) (Benjamini-Hochberg).

**Supplemental Table 5. Functional Mapping of WT1 Target Genes using DAVID.**

| Functional Group | Enrichment Score                                         | Median P-Value | Geometric Mean | Category        | Term                                                                                                     | Count    | % of Total | P-Value       | Bonferroni                                      | Benjamini | FDR      | Information Content (bits) |
|------------------|----------------------------------------------------------|----------------|----------------|-----------------|----------------------------------------------------------------------------------------------------------|----------|------------|---------------|-------------------------------------------------|-----------|----------|----------------------------|
| 5                | 7.23                                                     | 1.14E-06       | 5.92E-08       | GOTERM_BP_ALL   | GO:0048519--negative regulation of biological process                                                    | 160      | 9.9%       | 9.78E-16      | 5.19E-12                                        | 2.08E-13  | 1.91E-12 | 4.08                       |
|                  |                                                          |                |                | GOTERM_BP_ALL   | GO:0048523--negative regulation of cellular process                                                      | 150      | 9.3%       | 7.88E-15      | 4.09E-11                                        | 1.52E-11  | 1.51E-11 | 4.20                       |
|                  |                                                          |                |                | GOTERM_BP_ALL   | GO:0016481--negative regulation of transcription                                                         | 49       | 3.0%       | 8.14E-07      | 0.004                                           | 5.87E-05  | 0.002    | 6.00                       |
|                  |                                                          |                |                | GOTERM_BP_ALL   | GO:0031324--negative regulation of cellular metabolic process                                            | 57       | 3.5%       | 1.00E-06      | 0.005                                           | 7.11E-05  | 0.002    | 5.51                       |
|                  |                                                          |                |                | GOTERM_BP_ALL   | GO:0045934--negative regulation of nucleobase, nucleoside, nucleotide and nucleic acid metabolic process | 51       | 3.2%       | 1.14E-06      | 0.006                                           | 7.99E-05  | 0.002    | 5.90                       |
|                  |                                                          |                |                | GOTERM_BP_ALL   | GO:0009892--negative regulation of metabolic process                                                     | 62       | 3.9%       | 1.33E-06      | 0.007                                           | 9.21E-05  | 0.003    | 5.41                       |
|                  |                                                          |                |                | GOTERM_MF_ALL   | GO:0016564--transcription repressor activity                                                             | 33       | 2.1%       | 9.54E-06      | 0.025                                           | 0.003     | 0.017    | 6.72                       |
|                  |                                                          |                |                | GOTERM_BP_ALL   | GO:0045892--negative regulation of transcription, DNA-dependent                                          | 36       | 2.2%       | 4.59E-05      | 0.212                                           | 0.002     | 0.088    | 6.43                       |
|                  |                                                          |                |                | GOTERM_BP_ALL   | GO:0000122--negative regulation of transcription from RNA polymerase II promoter                         | 24       | 1.5%       | 0.002         | 1                                               | 0.069     | 3.999    | 6.93                       |
|                  |                                                          |                |                | 6               | 7.14                                                                                                     | 1.28E-07 | 7.17E-08   | GOTERM_BP_ALL | GO:0050793--regulation of developmental process | 57        | 3.5%     | 4.03E-09                   |
| GOTERM_BP_ALL    | GO:0045596--negative regulation of cell differentiation  | 26             | 1.6%           |                 |                                                                                                          |          |            | 8.97E-08      | 4.65E-04                                        | 7.76E-06  | 1.71E-04 | 7.35                       |
| GOTERM_BP_ALL    | GO:0045595--regulation of cell differentiation           | 38             | 2.4%           |                 |                                                                                                          |          |            | 1.66E-07      | 8.59E-04                                        | 1.36E-05  | 3.16E-04 | 6.16                       |
| GOTERM_BP_ALL    | GO:0051093--negative regulation of developmental process | 28             | 1.7%           |                 |                                                                                                          |          |            | 4.42E-07      | 0.002                                           | 3.48E-05  | 8.44E-04 | 5.80                       |
| 7                | 5.49                                                     | 1.92E-05       | 3.25E-06       | GOTERM_BP_ALL   | GO:0000074--regulation of progression through cell cycle                                                 | 62       | 3.9%       | 1.14E-07      | 5.91E-04                                        | 9.69E-06  | 2.17E-04 | 5.64                       |
|                  |                                                          |                |                | GOTERM_BP_ALL   | GO:0051726--regulation of cell cycle                                                                     | 62       | 3.9%       | 1.49E-07      | 7.74E-04                                        | 1.25E-05  | 2.85E-04 | 5.64                       |
|                  |                                                          |                |                | GOTERM_BP_ALL   | GO:0007049--cell cycle                                                                                   | 94       | 5.8%       | 1.92E-05      | 0.095                                           | 0.001     | 0.037    | 4.66                       |
|                  |                                                          |                |                | GOTERM_BP_ALL   | GO:0022402--cell cycle process                                                                           | 79       | 4.9%       | 2.28E-05      | 0.112                                           | 0.001     | 0.044    | 5.00                       |
|                  |                                                          |                |                | GOTERM_BP_ALL   | GO:0045786--negative regulation of progression through cell cycle                                        | 27       | 1.7%       | 4.90E-05      | 0.225                                           | 0.003     | 0.094    | 7.00                       |
| 8                | 4.90                                                     | 1.77E-05       | 1.25E-05       | SP_PIR_KEYWORDS | zinc                                                                                                     | 198      | 12.3%      | 1.27E-06      | 0.001                                           | 1.00E-04  | 0.002    | 3.54                       |
|                  |                                                          |                |                | GOTERM_MF_ALL   | GO:0008270--zinc ion binding                                                                             | 227      | 14.1%      | 1.68E-06      | 0.005                                           | 5.05E-04  | 0.003    | 3.33                       |
|                  |                                                          |                |                | SP_PIR_KEYWORDS | zinc-finger                                                                                              | 156      | 9.7%       | 2.31E-05      | 0.020                                           | 0.002     | 0.036    | 3.96                       |
|                  |                                                          |                |                | SP_PIR_KEYWORDS | metal-binding                                                                                            | 243      | 15.1%      | 1.39E-04      | 0.114                                           | 0.008     | 0.216    | 3.10                       |
| 9                | 4.84                                                     | 1.38E-04       | 1.46E-05       | GOTERM_MF_ALL   | GO:0043565--sequence-specific DNA binding                                                                | 87       | 5.4%       | 1.21E-11      | 3.26E-08                                        | 5.44E-09  | 2.15E-08 | 5.28                       |
|                  |                                                          |                |                | INTERPRO        | IPR012287:Homeodomain-related                                                                            | 34       | 2.1%       | 2.68E-05      | 0.145                                           | 0.145     | 0.052    | 6.52                       |
|                  |                                                          |                |                | INTERPRO        | IPR001356:Homeobox                                                                                       | 34       | 2.1%       | 1.24E-04      | 0.516                                           | 0.305     | 0.239    | 6.51                       |
|                  |                                                          |                |                | SP_PIR_KEYWORDS | Homeobox                                                                                                 | 41       | 2.5%       | 1.52E-04      | 0.124                                           | 0.008     | 0.236    | 6.24                       |
|                  |                                                          |                |                | UP_SEQ_FEATURE  | DNA-binding region:Homeobox                                                                              | 31       | 1.9%       | 5.28E-04      | 1                                               | 0.670     | 1.113    | 6.70                       |
|                  |                                                          |                |                | SMART           | SM00389:HOX                                                                                              | 37       | 2.3%       | 0.003         | 0.842                                           | 0.842     | 4.404    | 6.39                       |
| 10               | 4.53                                                     | 9.09E-06       | 2.95E-05       | GOTERM_BP_ALL   | GO:0030029--actin filament-based process                                                                 | 38       | 2.4%       | 4.97E-06      | 0.025                                           | 3.19E-04  | 0.010    | 6.50                       |
|                  |                                                          |                |                | GOTERM_BP_ALL   | GO:0030036--actin cytoskeleton organization and biogenesis                                               | 36       | 2.2%       | 9.09E-06      | 0.046                                           | 5.42E-04  | 0.017    | 6.57                       |
|                  |                                                          |                |                | GOTERM_BP_ALL   | GO:0007010--cytoskeleton organization and biogenesis                                                     | 67       | 4.2%       | 5.70E-04      | 0.948                                           | 0.022     | 1.083    | 5.29                       |
| 11               | 4.33                                                     | 8.05E-05       | 4.64E-05       | GOTERM_BP_ALL   | GO:0007389--pattern specification process                                                                | 44       | 2.7%       | 7.27E-07      | 0.004                                           | 5.55E-05  | 0.001    | 6.31                       |
|                  |                                                          |                |                | GOTERM_BP_ALL   | GO:0003002--regionalization                                                                              | 28       | 1.7%       | 8.05E-05      | 0.342                                           | 0.004     | 0.154    | 6.96                       |
|                  |                                                          |                |                | GOTERM_BP_ALL   | GO:0009952--anterior/posterior pattern formation                                                         | 18       | 1.1%       | 0.002         | 1                                               | 0.060     | 3.213    | 7.63                       |
| 12               | 4.06                                                     | 7.18E-05       | 8.66E-05       | GOTERM_BP_ALL   | GO:0001501--skeletal development                                                                         | 35       | 2.2%       | 8.13E-06      | 0.041                                           | 4.91E-04  | 0.016    | 6.63                       |
|                  |                                                          |                |                | GOTERM_BP_ALL   | GO:0046849--bone remodeling                                                                              | 23       | 1.4%       | 2.95E-05      | 0.142                                           | 0.002     | 0.056    | 7.40                       |
|                  |                                                          |                |                | GOTERM_BP_ALL   | GO:0001503--ossification                                                                                 | 21       | 1.3%       | 6.14E-05      | 0.273                                           | 0.003     | 0.117    | 7.55                       |
|                  |                                                          |                |                | GOTERM_BP_ALL   | GO:0031214--biomineral formation                                                                         | 21       | 1.3%       | 7.18E-05      | 0.311                                           | 0.004     | 0.137    | 7.52                       |
|                  |                                                          |                |                | GOTERM_BP_ALL   | GO:0009888--tissue development                                                                           | 45       | 2.8%       | 1.30E-04      | 0.491                                           | 0.006     | 0.248    | 5.06                       |
|                  |                                                          |                |                | GOTERM_BP_ALL   | GO:0048771--tissue remodeling                                                                            | 24       | 1.5%       | 1.47E-04      | 0.534                                           | 0.007     | 0.281    | 7.16                       |
|                  |                                                          |                |                | GOTERM_BP_ALL   | GO:0001649--osteoblast differentiation                                                                   | 9        | 0.6%       | 0.002         | 1                                               | 0.061     | 3.381    | 9.30                       |
| 13               | 3.88                                                     | 3.90E-05       | 1.31E-04       | GOTERM_BP_ALL   | GO:0030324--lung development                                                                             | 19       | 1.2%       | 2.99E-06      | 0.015                                           | 1.96E-04  | 0.006    | 8.13                       |
|                  |                                                          |                |                | GOTERM_BP_ALL   | GO:0030323--respiratory tube development                                                                 | 19       | 1.2%       | 3.80E-06      | 0.020                                           | 2.47E-04  | 0.007    | 8.11                       |
|                  |                                                          |                |                | GOTERM_BP_ALL   | GO:0035295--tube development                                                                             | 35       | 2.2%       | 3.90E-05      | 0.183                                           | 0.002     | 0.075    | 6.47                       |
|                  |                                                          |                |                | GOTERM_BP_ALL   | GO:0001763--morphogenesis of a branching structure                                                       | 13       | 0.8%       | 0.008         | 1                                               | 0.179     | 13.737   | 8.02                       |
|                  |                                                          |                |                | GOTERM_BP_ALL   | GO:0048754--branching morphogenesis of a tube                                                            | 12       | 0.7%       | 0.011         | 1                                               | 0.234     | 19.451   | 8.11                       |
| 14               | 3.84                                                     | 1.14E-04       | 1.46E-04       | GOTERM_BP_ALL   | GO:0008283--cell proliferation                                                                           | 71       | 4.4%       | 7.12E-05      | 0.309                                           | 0.004     | 0.136    | 5.09                       |
|                  |                                                          |                |                | GOTERM_BP_ALL   | GO:0042127--regulation of cell proliferation                                                             | 53       | 3.3%       | 1.14E-04      | 0.446                                           | 0.005     | 0.217    | 5.63                       |
|                  |                                                          |                |                | GOTERM_BP_ALL   | GO:0008284--positive regulation of cell proliferation                                                    | 32       | 2.0%       | 3.86E-04      | 0.865                                           | 0.016     | 0.734    | 6.51                       |
| 15               | 3.83                                                     | 8.33E-05       | 1.48E-04       | GOTERM_BP_ALL   | GO:0007417--central nervous system development                                                           | 41       | 2.5%       | 6.06E-05      | 0.270                                           | 0.003     | 0.116    | 6.26                       |
|                  |                                                          |                |                | GOTERM_BP_ALL   | GO:0007420--brain development                                                                            | 34       | 2.1%       | 8.33E-05      | 0.351                                           | 0.004     | 0.159    | 6.58                       |
|                  |                                                          |                |                | GOTERM_BP_ALL   | GO:0030900--forebrain development                                                                        | 20       | 1.2%       | 6.40E-04      | 0.964                                           | 0.025     | 1.217    | 7.52                       |

**Supplemental Table 5. Functional Mapping of WT1 Target Genes using DAVID.**

| Functional Group | Enrichment Score                     | Median P-Value | Geometric Mean | Category        | Term                                                                       | Count | % of Total | P-Value  | Bonferroni | Benjamini | FDR      | Information Content (bits) |
|------------------|--------------------------------------|----------------|----------------|-----------------|----------------------------------------------------------------------------|-------|------------|----------|------------|-----------|----------|----------------------------|
| 16               | 3.83                                 | 1.07E-04       | 1.48E-04       | GOTERM_BP_ALL   | GO:0009790~embryonic development                                           | 66    | 4.1%       | 7.97E-06 | 0.041      | 4.87E-04  | 0.015    | 5.40                       |
|                  |                                      |                |                | GOTERM_BP_ALL   | GO:0048598~embryonic morphogenesis                                         | 35    | 2.2%       | 2.04E-05 | 0.101      | 0.001     | 0.039    | 6.32                       |
|                  |                                      |                |                | GOTERM_BP_ALL   | GO:0021915~neural tube development                                         | 15    | 0.9%       | 8.25E-05 | 0.348      | 0.004     | 0.157    | 8.47                       |
|                  |                                      |                |                | GOTERM_BP_ALL   | GO:0043009~chordate embryonic development                                  | 36    | 2.2%       | 1.32E-04 | 0.495      | 0.006     | 0.251    | 6.43                       |
|                  |                                      |                |                | GOTERM_BP_ALL   | GO:0009792~embryonic development ending in birth or egg hatching           | 36    | 2.2%       | 1.73E-04 | 0.592      | 0.008     | 0.329    | 6.42                       |
|                  |                                      |                |                | GOTERM_BP_ALL   | GO:0001701~in utero embryonic development                                  | 18    | 1.1%       | 0.035    | 1          | 0.463     | 48.883   | 7.25                       |
| 17               | 3.72                                 | 0.002          | 1.92E-04       | GOTERM_BP_ALL   | GO:0006464~protein modification process                                    | 214   | 13.3%      | 2.24E-12 | 1.16E-08   | 2.98E-10  | 4.27E-09 | 3.50                       |
|                  |                                      |                |                | GOTERM_BP_ALL   | GO:0043412~biopolymer modification                                         | 219   | 13.6%      | 6.87E-12 | 3.57E-08   | 8.70E-10  | 1.31E-08 | 3.45                       |
|                  |                                      |                |                | GOTERM_BP_ALL   | GO:0043687~post-translational protein modification                         | 188   | 11.7%      | 3.16E-11 | 1.64E-07   | 3.82E-09  | 6.04E-08 | 3.71                       |
|                  |                                      |                |                | GOTERM_BP_ALL   | GO:0006468~protein amino acid phosphorylation                              | 96    | 6.0%       | 3.54E-08 | 1.84E-04   | 3.16E-06  | 6.75E-05 | 4.83                       |
|                  |                                      |                |                | GOTERM_BP_ALL   | GO:0006793~phosphorus metabolic process                                    | 120   | 7.4%       | 1.73E-07 | 8.98E-04   | 1.38E-05  | 3.30E-04 | 4.39                       |
|                  |                                      |                |                | GOTERM_BP_ALL   | GO:0006796~phosphate metabolic process                                     | 120   | 7.4%       | 1.73E-07 | 8.98E-04   | 1.38E-05  | 3.30E-04 | 4.39                       |
|                  |                                      |                |                | GOTERM_BP_ALL   | GO:0016310~phosphorylation                                                 | 101   | 6.3%       | 1.71E-06 | 0.009      | 1.15E-04  | 0.003    | 4.65                       |
|                  |                                      |                |                | GOTERM_MF_ALL   | GO:0016301~kinase activity                                                 | 113   | 7.0%       | 3.36E-05 | 0.087      | 0.006     | 0.060    | 4.40                       |
|                  |                                      |                |                | GOTERM_MF_ALL   | GO:0016773~phosphotransferase activity, alcohol group as acceptor          | 92    | 5.7%       | 7.24E-05 | 0.178      | 0.011     | 0.129    | 4.73                       |
|                  |                                      |                |                | GOTERM_MF_ALL   | GO:0004672~protein kinase activity                                         | 80    | 5.0%       | 1.23E-04 | 0.283      | 0.017     | 0.219    | 4.97                       |
|                  |                                      |                |                | INTERPRO        | IPR000719:Protein kinase, core                                             | 50    | 3.1%       | 1.58E-04 | 0.604      | 0.265     | 0.305    | 5.71                       |
|                  |                                      |                |                | SP_PIR_KEYWORDS | kinase                                                                     | 90    | 5.6%       | 7.23E-04 | 0.466      | 0.029     | 1.115    | 4.33                       |
|                  |                                      |                |                | GOTERM_MF_ALL   | GO:0016772~transferase activity, transferring phosphorus-containing groups | 119   | 7.4%       | 0.001    | 0.943      | 0.108     | 1.869    | 4.21                       |
|                  |                                      |                |                | GOTERM_MF_ALL   | GO:0000166~nucleotide binding                                              | 207   | 12.8%      | 0.002    | 0.986      | 0.138     | 2.788    | 3.24                       |
|                  |                                      |                |                | GOTERM_MF_ALL   | GO:0004674~protein serine/threonine kinase activity                        | 62    | 3.9%       | 0.002    | 0.993      | 0.145     | 3.240    | 5.26                       |
|                  |                                      |                |                | GOTERM_MF_ALL   | GO:0016740~transferase activity                                            | 191   | 11.9%      | 0.002    | 0.999      | 0.175     | 4.225    | 3.38                       |
|                  |                                      |                |                | GOTERM_MF_ALL   | GO:0004713~protein-tyrosine kinase activity                                | 42    | 2.6%       | 0.004    | 1.000      | 0.251     | 6.608    | 5.87                       |
|                  |                                      |                |                | UP_SEQ_FEATURE  | domain:Protein kinase                                                      | 54    | 3.4%       | 0.004    | 1          | 0.982     | 8.370    | 5.69                       |
|                  |                                      |                |                | SP_PIR_KEYWORDS | nucleotide-binding                                                         | 144   | 8.9%       | 0.005    | 0.980      | 0.119     | 6.777    | 3.76                       |
|                  |                                      |                |                | GOTERM_MF_ALL   | GO:0032553~ribonucleotide binding                                          | 173   | 10.7%      | 0.007    | 1          | 0.355     | 11.400   | 3.51                       |
|                  |                                      |                |                | GOTERM_MF_ALL   | GO:0032555~purine ribonucleotide binding                                   | 173   | 10.7%      | 0.007    | 1          | 0.355     | 11.400   | 3.51                       |
|                  |                                      |                |                | UP_SEQ_FEATURE  | binding site:ATP                                                           | 56    | 3.5%       | 0.008    | 1          | 0.994     | 15.038   | 5.61                       |
|                  |                                      |                |                | SP_PIR_KEYWORDS | Serine/threonine-protein kinase                                            | 45    | 2.8%       | 0.017    | 1          | 0.282     | 22.923   | 5.73                       |
|                  |                                      |                |                | GOTERM_MF_ALL   | GO:0032559~adenyl ribonucleotide binding                                   | 141   | 8.8%       | 0.018    | 1          | 0.539     | 27.459   | 3.82                       |
|                  |                                      |                |                | GOTERM_MF_ALL   | GO:0017076~purine nucleotide binding                                       | 175   | 10.9%      | 0.018    | 1          | 0.542     | 28.048   | 3.45                       |
|                  |                                      |                |                | UP_SEQ_FEATURE  | active site:Proton acceptor                                                | 67    | 4.2%       | 0.019    | 1          | 1.000     | 33.256   | 5.26                       |
|                  |                                      |                |                | SP_PIR_KEYWORDS | transferase                                                                | 135   | 8.4%       | 0.024    | 1          | 0.333     | 31.413   | 3.69                       |
|                  |                                      |                |                | UP_SEQ_FEATURE  | nucleotide phosphate-binding region:ATP                                    | 80    | 5.0%       | 0.028    | 1          | 1.000     | 45.609   | 4.90                       |
|                  |                                      |                |                | INTERPRO        | IPR002290:Serine/threonine protein kinase                                  | 27    | 1.7%       | 0.032    | 1          | 0.978     | 46.786   | 6.48                       |
|                  |                                      |                |                | INTERPRO        | IPR008271:Serine/threonine protein kinase, active site                     | 31    | 1.9%       | 0.038    | 1          | 0.979     | 52.671   | 6.21                       |
| GOTERM_MF_ALL    | GO:0005524~ATP binding               | 135            | 8.4%           | 0.046           | 1                                                                          | 0.766 | 56.466     | 3.84     |            |           |          |                            |
| GOTERM_MF_ALL    | GO:0030554~adenyl nucleotide binding | 143            | 8.9%           | 0.047           | 1                                                                          | 0.770 | 57.269     | 3.75     |            |           |          |                            |
| SP_PIR_KEYWORDS  | atp-binding                          | 105            | 6.5%           | 0.081           | 1                                                                          | 0.632 | 72.920     | 4.18     |            |           |          |                            |
| SMART            | SM00220:S_TKc                        | 45             | 2.8%           | 0.108           | 1                                                                          | 0.923 | 81.616     | 5.69     |            |           |          |                            |
| 18               | 3.38                                 | 5.64E-04       | 4.13E-04       | SP_PIR_KEYWORDS | cytoskeleton                                                               | 47    | 2.9%       | 1.01E-04 | 0.084      | 0.006     | 0.156    | 5.24                       |
|                  |                                      |                |                | GOTERM_MF_ALL   | GO:0008092~cytoskeletal protein binding                                    | 55    | 3.4%       | 1.40E-04 | 0.316      | 0.018     | 0.249    | 5.58                       |
|                  |                                      |                |                | GOTERM_MF_ALL   | GO:0003779~actin binding                                                   | 39    | 2.4%       | 9.88E-04 | 0.931      | 0.105     | 1.745    | 6.08                       |
|                  |                                      |                |                | SP_PIR_KEYWORDS | actin-binding                                                              | 28    | 1.7%       | 0.002    | 0.837      | 0.067     | 3.191    | 6.37                       |
| 19               | 2.62                                 | 0.003          | 0.002          | GOTERM_BP_ALL   | GO:0048646~anatomical structure formation                                  | 34    | 2.1%       | 1.35E-04 | 0.505      | 0.006     | 0.259    | 5.99                       |
|                  |                                      |                |                | GOTERM_BP_ALL   | GO:0001944~vasculature development                                         | 33    | 2.1%       | 0.002    | 1          | 0.063     | 3.568    | 6.27                       |
|                  |                                      |                |                | GOTERM_BP_ALL   | GO:0001568~blood vessel development                                        | 32    | 2.0%       | 0.003    | 1          | 0.092     | 5.503    | 6.29                       |
|                  |                                      |                |                | GOTERM_BP_ALL   | GO:0048514~blood vessel morphogenesis                                      | 28    | 1.7%       | 0.005    | 1          | 0.127     | 8.472    | 6.51                       |
|                  |                                      |                |                | GOTERM_BP_ALL   | GO:0001525~angiogenesis                                                    | 21    | 1.3%       | 0.024    | 1          | 0.365     | 36.690   | 6.85                       |
| 20               | 2.55                                 | 0.004          | 0.003          | GOTERM_BP_ALL   | GO:0021915~neural tube development                                         | 15    | 0.9%       | 8.25E-05 | 0.348      | 0.004     | 0.157    | 8.47                       |
|                  |                                      |                |                | GOTERM_BP_ALL   | GO:0035239~tube morphogenesis                                              | 25    | 1.6%       | 8.60E-04 | 0.989      | 0.032     | 1.630    | 6.93                       |
|                  |                                      |                |                | GOTERM_BP_ALL   | GO:0001841~neural tube formation                                           | 11    | 0.7%       | 0.002    | 1          | 0.079     | 4.653    | 8.81                       |
|                  |                                      |                |                | GOTERM_BP_ALL   | GO:0001839~neural plate morphogenesis                                      | 11    | 0.7%       | 0.003    | 1          | 0.092     | 5.527    | 8.77                       |
|                  |                                      |                |                | GOTERM_BP_ALL   | GO:0001840~neural plate development                                        | 11    | 0.7%       | 0.004    | 1          | 0.105     | 6.521    | 8.77                       |
|                  |                                      |                |                | GOTERM_BP_ALL   | GO:0001838~embryonic epithelial tube formation                             | 11    | 0.7%       | 0.004    | 1          | 0.117     | 7.645    | 8.70                       |
|                  |                                      |                |                | GOTERM_BP_ALL   | GO:0001843~neural tube closure                                             | 9     | 0.6%       | 0.005    | 1          | 0.137     | 9.611    | 9.25                       |
|                  |                                      |                |                | GOTERM_BP_ALL   | GO:0002009~morphogenesis of an epithelium                                  | 19    | 1.2%       | 0.007    | 1          | 0.178     | 13.349   | 7.11                       |

**Supplemental Table 5. Functional Mapping of WT1 Target Genes using DAVID.**

| Functional Group | Enrichment Score                                              | Median P-Value | Geometric Mean | Category        | Term                                     | Count                                                                            | % of Total | P-Value  | Bonferroni | Benjamini | FDR    | Information Content (bits) |        |
|------------------|---------------------------------------------------------------|----------------|----------------|-----------------|------------------------------------------|----------------------------------------------------------------------------------|------------|----------|------------|-----------|--------|----------------------------|--------|
| 20               | 2.55                                                          | 0.004          | 0.003          | GOTERM_BP_ALL   | GO:0014020~primary neural tube formation | 9                                                                                | 0.6%       | 0.008    | 1          | 0.180     | 13.560 | 9.11                       |        |
|                  |                                                               |                |                |                 | GOTERM_BP_ALL                            | GO:0016331~morphogenesis of embryonic epithelium                                 | 12         | 0.7%     | 0.013      | 1         | 0.256  | 21.603                     | 8.33   |
| 21               | 2.55                                                          | 0.003          | 0.003          | GOTERM_BP_ALL   | GO:0016049~cell growth                   | 24                                                                               | 1.5%       | 1.89E-04 | 0.625      | 0.008     | 0.360  | 7.18                       |        |
|                  |                                                               |                |                |                 | GOTERM_BP_ALL                            | GO:0008361~regulation of cell size                                               | 25         | 1.6%     | 3.35E-04   | 0.824     | 0.014  | 0.638                      | 7.00   |
|                  |                                                               |                |                |                 | GOTERM_BP_ALL                            | GO:0040007~growth                                                                | 39         | 2.4%     | 0.002      | 1         | 0.060  | 3.261                      | 6.07   |
|                  |                                                               |                |                |                 | GOTERM_BP_ALL                            | GO:0001558~regulation of cell growth                                             | 18         | 1.1%     | 0.005      | 1         | 0.126  | 8.357                      | 7.43   |
|                  |                                                               |                |                |                 | GOTERM_BP_ALL                            | GO:0040008~regulation of growth                                                  | 24         | 1.5%     | 0.018      | 1         | 0.319  | 29.928                     | 6.68   |
|                  |                                                               |                |                |                 | SP_PIR_KEYWORDS                          | growth regulation                                                                | 8          | 0.5%     | 0.057      | 1         | 0.554  | 59.732                     | 8.73   |
| 22               | 2.54                                                          | 0.003          | 0.003          | GOTERM_BP_ALL   | GO:0014706~striated muscle development   | 25                                                                               | 1.6%       | 3.35E-04 | 0.824      | 0.014     | 0.638  | 7.07                       |        |
|                  |                                                               |                |                |                 | GOTERM_BP_ALL                            | GO:0007517~muscle development                                                    | 29         | 1.8%     | 0.001      | 0.997     | 0.042  | 2.155                      | 6.68   |
|                  |                                                               |                |                |                 | GOTERM_BP_ALL                            | GO:0048747~muscle fiber development                                              | 15         | 0.9%     | 0.002      | 1         | 0.059  | 3.101                      | 8.04   |
|                  |                                                               |                |                |                 | GOTERM_BP_ALL                            | GO:0048741~skeletal muscle fiber development                                     | 15         | 0.9%     | 0.002      | 1         | 0.059  | 3.101                      | 8.04   |
|                  |                                                               |                |                |                 | GOTERM_BP_ALL                            | GO:0007519~skeletal muscle development                                           | 19         | 1.2%     | 0.003      | 1         | 0.081  | 4.841                      | 7.43   |
|                  |                                                               |                |                |                 | GOTERM_BP_ALL                            | GO:0045662~negative regulation of myoblast differentiation                       | 4          | 0.3%     | 0.005      | 1         | 0.129  | 8.865                      | 12.06  |
|                  |                                                               |                |                |                 | GOTERM_BP_ALL                            | GO:0042692~muscle cell differentiation                                           | 14         | 0.9%     | 0.006      | 1         | 0.150  | 10.789                     | 7.93   |
|                  |                                                               |                |                |                 | GOTERM_BP_ALL                            | GO:0045661~regulation of myoblast differentiation                                | 5          | 0.3%     | 0.009      | 1         | 0.203  | 16.330                     | 11.06  |
|                  |                                                               |                |                |                 | GOTERM_BP_ALL                            | GO:0045445~myoblast differentiation                                              | 9          | 0.6%     | 0.019      | 1         | 0.325  | 30.925                     | 8.81   |
| 23               | 2.43                                                          | 0.004          | 0.004          | INTERPRO        | IPR011700:Basic leucine zipper           | 8                                                                                | 0.5%       | 3.26E-04 | 0.852      | 0.380     | 0.629  | 9.77                       |        |
|                  |                                                               |                |                |                 | INTERPRO                                 | IPR004827:Basic-leucine zipper (bZIP) transcription factor domain:Leucine-zipper | 12         | 0.7%     | 0.001      | 1         | 0.539  | 2.520                      | 8.39   |
|                  |                                                               |                |                |                 | UP_SEQ_FEATURE                           | domain:Leucine-zipper                                                            | 19         | 1.2%     | 0.004      | 1         | 0.972  | 8.889                      | 7.58   |
|                  |                                                               |                |                |                 | SMART                                    | SM00338:BRLZ                                                                     | 12         | 0.7%     | 0.012      | 1         | 0.828  | 15.773                     | 8.31   |
|                  |                                                               |                |                |                 | INTERPRO                                 | IPR000837:Fos transforming protein                                               | 4          | 0.3%     | 0.031      | 1         | 0.977  | 45.489                     | 10.77  |
| 24               | 2.39                                                          | 0.002          | 0.004          | GOTERM_BP_ALL   | GO:0016568~chromatin modification        | 31                                                                               | 1.9%       | 1.43E-04 | 0.524      | 0.006     | 0.273  | 6.73                       |        |
|                  |                                                               |                |                |                 | GOTERM_BP_ALL                            | GO:0006323~DNA packaging                                                         | 40         | 2.5%     | 8.08E-04   | 0.985     | 0.031  | 1.532                      | 5.89   |
|                  |                                                               |                |                |                 | SP_PIR_KEYWORDS                          | Chromatin regulator                                                              | 20         | 1.2%     | 0.001      | 0.691     | 0.048  | 2.082                      | 7.46   |
|                  |                                                               |                |                |                 | GOTERM_BP_ALL                            | GO:0006325~establishment and/or maintenance of chromatin architecture            | 38         | 2.4%     | 0.002      | 1         | 0.061  | 3.353                      | 6.04   |
|                  |                                                               |                |                |                 | GOTERM_BP_ALL                            | GO:0006259~DNA metabolic process                                                 | 66         | 4.1%     | 0.113      | 1         | 0.786  | 89.812                     | 4.81   |
|                  |                                                               |                |                |                 | GOTERM_BP_ALL                            | GO:0051276~chromosome organization and biogenesis                                | 40         | 2.5%     | 0.156      | 1         | 0.862  | 96.047                     | 5.69   |
| 25               | 2.28                                                          | 0.007          | 0.005          | GOTERM_BP_ALL   | GO:0012501~programmed cell death         | 84                                                                               | 5.2%       | 3.61E-04 | 0.846      | 0.015     | 0.687  | 4.73                       |        |
|                  |                                                               |                |                |                 | GOTERM_BP_ALL                            | GO:0008219~cell death                                                            | 86         | 5.3%     | 4.63E-04   | 0.910     | 0.019  | 0.882                      | 4.68   |
|                  |                                                               |                |                |                 | GOTERM_BP_ALL                            | GO:0043068~positive regulation of programmed cell death                          | 33         | 2.1%     | 4.66E-04   | 0.911     | 0.019  | 0.887                      | 6.47   |
|                  |                                                               |                |                |                 | GOTERM_BP_ALL                            | GO:0016265~death                                                                 | 86         | 5.3%     | 5.04E-04   | 0.927     | 0.020  | 0.958                      | 4.68   |
|                  |                                                               |                |                |                 | GOTERM_BP_ALL                            | GO:0006915~apoptosis                                                             | 82         | 5.1%     | 5.25E-04   | 0.935     | 0.021  | 0.999                      | 4.76   |
|                  |                                                               |                |                |                 | GOTERM_BP_ALL                            | GO:0043065~positive regulation of apoptosis                                      | 31         | 1.9%     | 0.002      | 1         | 0.057  | 2.954                      | 6.49   |
|                  |                                                               |                |                |                 | GOTERM_BP_ALL                            | GO:0006917~induction of apoptosis                                                | 24         | 1.5%     | 0.007      | 1         | 0.175  | 12.925                     | 6.84   |
|                  |                                                               |                |                |                 | GOTERM_BP_ALL                            | GO:0012502~induction of programmed cell death                                    | 24         | 1.5%     | 0.007      | 1         | 0.175  | 12.925                     | 6.84   |
|                  |                                                               |                |                |                 | SP_PIR_KEYWORDS                          | apoptosis                                                                        | 35         | 2.2%     | 0.009      | 1         | 0.200  | 13.723                     | 5.76   |
|                  |                                                               |                |                |                 | GOTERM_BP_ALL                            | GO:0043067~regulation of programmed cell death                                   | 54         | 3.4%     | 0.010      | 1         | 0.211  | 17.080                     | 5.32   |
|                  |                                                               |                |                |                 | GOTERM_BP_ALL                            | GO:0042981~regulation of apoptosis                                               | 53         | 3.3%     | 0.011      | 1         | 0.236  | 19.765                     | 5.35   |
|                  |                                                               |                |                |                 | GOTERM_BP_ALL                            | GO:0043066~negative regulation of apoptosis                                      | 22         | 1.4%     | 0.095      | 1         | 0.743  | 85.055                     | 6.57   |
|                  |                                                               |                |                |                 | GOTERM_BP_ALL                            | GO:0043069~negative regulation of programmed cell death                          | 22         | 1.4%     | 0.107      | 1         | 0.776  | 88.474                     | 6.54   |
|                  |                                                               |                |                |                 | GOTERM_BP_ALL                            | GO:0006916~anti-apoptosis                                                        | 9          | 0.6%     | 0.605      | 1         | 0.997  | 100                        | 7.47   |
|                  |                                                               |                |                |                 | SP_PIR_KEYWORDS                          | glycosyltransferase                                                              | 29         | 1.8%     | 0.003      | 0.936     | 0.088  | 4.804                      | 6.56   |
|                  |                                                               |                |                |                 | GOTERM_BP_ALL                            | GO:0006486~protein amino acid glycosylation                                      | 16         | 1.0%     | 0.004      | 1         | 0.105  | 6.615                      | 7.68   |
|                  |                                                               |                |                |                 | GOTERM_BP_ALL                            | GO:0043413~biopolymer glycosylation                                              | 16         | 1.0%     | 0.005      | 1         | 0.132  | 9.152                      | 7.63   |
|                  |                                                               |                |                |                 | GOTERM_BP_ALL                            | GO:0009100~glycoprotein metabolic process                                        | 19         | 1.2%     | 0.006      | 1         | 0.156  | 11.295                     | 6.96   |
| GOTERM_MF_ALL    | GO:0016757~transferase activity, transferring glycosyl groups | 32             | 2.0%           | 0.009           | 1                                        | 0.401                                                                            | 14.669     | 6.21     |            |           |        |                            |        |
| GOTERM_BP_ALL    | GO:0009101~glycoprotein biosynthetic process                  | 16             | 1.0%           | 0.010           | 1                                        | 0.217                                                                            | 17.792     | 7.28     |            |           |        |                            |        |
| 26               | 2.25                                                          | 0.006          | 0.006          | SP_PIR_KEYWORDS | glycosyltransferase                      | 29                                                                               | 1.8%       | 0.003    | 0.936      | 0.088     | 4.804  | 6.5599                     |        |
|                  |                                                               |                |                |                 | GOTERM_BP_ALL                            | GO:0006486~protein amino acid glycosylation                                      | 16         | 1.0%     | 0.004      | 1         | 0.105  | 6.615                      | 7.6846 |
|                  |                                                               |                |                |                 | GOTERM_BP_ALL                            | GO:0043413~biopolymer glycosylation                                              | 16         | 1.0%     | 0.005      | 1         | 0.132  | 9.152                      | 7.6333 |
|                  |                                                               |                |                |                 | GOTERM_BP_ALL                            | GO:0009100~glycoprotein metabolic process                                        | 19         | 1.2%     | 0.006      | 1         | 0.156  | 11.295                     | 6.9616 |
|                  |                                                               |                |                |                 | GOTERM_MF_ALL                            | GO:0016757~transferase activity, transferring glycosyl groups                    | 32         | 2.0%     | 0.009      | 1         | 0.401  | 14.669                     | 6.2078 |
|                  |                                                               |                |                |                 | GOTERM_BP_ALL                            | GO:0009101~glycoprotein biosynthetic process                                     | 16         | 1.0%     | 0.010      | 1         | 0.217  | 17.792                     | 7.2782 |
| 27               | 2.20                                                          | 0.005          | 0.006          | GOTERM_BP_ALL   | GO:0050673~epithelial cell proliferation | 11                                                                               | 0.7%       | 2.79E-04 | 0.765      | 0.012     | 0.532  | 8.97                       |        |
|                  |                                                               |                |                |                 | GOTERM_BP_ALL                            | GO:0050678~regulation of epithelial cell proliferation                           | 8          | 0.5%     | 0.005      | 1         | 0.132  | 9.212                      | 9.30   |

**Supplemental Table 5. Functional Mapping of WT1 Target Genes using DAVID.**

| Functional Group | Enrichment Score | Median P-Value | Geometric Mean | Category        | Term                                                             | Count | % of Total | P-Value  | Bonferroni | Benjamini | FDR    | Information Content (bits) |
|------------------|------------------|----------------|----------------|-----------------|------------------------------------------------------------------|-------|------------|----------|------------|-----------|--------|----------------------------|
| 27               | 2.20             | 0.005          | 0.006          | GOTERM_BP_ALL   | GO:0050679--positive regulation of epithelial cell proliferation | 4     | 0.3%       | 0.179    | 1          | 0.884     | 97.698 | 9.81                       |
| 28               | 2.15             | 0.018          | 0.007          | SP_PIR_KEYWORDS | golgi apparatus                                                  | 60    | 3.7%       | 1.57E-04 | 0.127      | 0.008     | 0.243  | 5.36                       |
|                  |                  |                |                | GOTERM_MF_ALL   | GO:0008194--UDP-glycosyltransferase activity                     | 20    | 1.2%       | 5.09E-04 | 0.748      | 0.058     | 0.903  | 7.49                       |
|                  |                  |                |                | SP_PIR_KEYWORDS | glycosyltransferase                                              | 29    | 1.8%       | 0.003    | 0.936      | 0.088     | 4.804  | 6.56                       |
|                  |                  |                |                | GOTERM_MF_ALL   | GO:0016757--transferase activity, transferring glycosyl groups   | 32    | 2.0%       | 0.009    | 1          | 0.401     | 14.669 | 6.21                       |
|                  |                  |                |                | SP_PIR_KEYWORDS | Manganese                                                        | 19    | 1.2%       | 0.018    | 1          | 0.299     | 24.901 | 7.23                       |
|                  |                  |                |                | GOTERM_MF_ALL   | GO:0016758--transferase activity, transferring hexosyl groups    | 22    | 1.4%       | 0.020    | 1          | 0.559     | 30.691 | 6.85                       |
|                  |                  |                |                | SP_PIR_KEYWORDS | signal-anchor                                                    | 42    | 2.6%       | 0.028    | 1          | 0.366     | 36.088 | 5.68                       |
|                  |                  |                |                | UP_SEQ_FEATURE  | topological domain:Luminal                                       | 37    | 2.3%       | 0.035    | 1          | 1         | 53.440 | 6.09                       |
|                  |                  |                |                | KEGG_PATHWAY    | mmu01030:Glycan structures - biosynthesis 1                      | 19    | 1.2%       | 0.054    | 1          | 0.314     | 50.292 | 7.40                       |
| 29               | 2.14             | 0.012          | 0.007          | INTERPRO        | IPR011598:Helix-loop-helix DNA-binding                           | 16    | 1.0%       | 0.001    | 0.997      | 0.631     | 1.952  | 7.73                       |
|                  |                  |                |                | UP_SEQ_FEATURE  | DNA-binding region:Basic motif                                   | 24    | 1.5%       | 0.001    | 1          | 0.862     | 3.087  | 7.22                       |
|                  |                  |                |                | INTERPRO        | IPR001092:Basic helix-loop-helix dimerisation region bHLH        | 16    | 1.0%       | 0.012    | 1          | 0.897     | 21.311 | 7.39                       |
|                  |                  |                |                | SMART           | SM00353:HLH                                                      | 18    | 1.1%       | 0.031    | 1          | 0.798     | 37.377 | 7.31                       |
|                  |                  |                |                | UP_SEQ_FEATURE  | domain:Helix-loop-helix motif                                    | 15    | 0.9%       | 0.033    | 1          | 1         | 50.744 | 7.79                       |
| 30               | 3.11             | 0.011          | 0.008          | GOTERM_BP_ALL   | GO:0045926--negative regulation of growth                        | 11    | 0.7%       | 0.001    | 0.997      | 0.042     | 2.172  | 8.74                       |
|                  |                  |                |                | GOTERM_BP_ALL   | GO:0001558--regulation of cell growth                            | 18    | 1.1%       | 0.005    | 1          | 0.126     | 8.357  | 7.43                       |
|                  |                  |                |                | GOTERM_BP_ALL   | GO:0030308--negative regulation of cell growth                   | 7     | 0.4%       | 0.017    | 1          | 0.300     | 27.374 | 9.36                       |
|                  |                  |                |                | GOTERM_BP_ALL   | GO:0045792--negative regulation of cell size                     | 7     | 0.4%       | 0.043    | 1          | 0.521     | 56.863 | 9.02                       |
| 31               | 2.05             | 0.012          | 0.009          | INTERPRO        | IPR000504:RNA recognition motif, RNP-1                           | 27    | 1.7%       | 0.001    | 0.998      | 0.536     | 2.007  | 6.87                       |
|                  |                  |                |                | INTERPRO        | IPR012677:Nucleotide-binding, alpha-beta plait                   | 27    | 1.7%       | 0.001    | 0.998      | 0.536     | 2.007  | 6.87                       |
|                  |                  |                |                | SP_PIR_KEYWORDS | rna-binding                                                      | 48    | 3.0%       | 0.012    | 1          | 0.236     | 17.522 | 5.58                       |
|                  |                  |                |                | SMART           | SM00360:RRM                                                      | 29    | 1.8%       | 0.032    | 1          | 0.776     | 37.781 | 6.71                       |
|                  |                  |                |                | GOTERM_MF_ALL   | GO:0003723--RNA binding                                          | 60    | 3.7%       | 0.126    | 1          | 0.948     | 90.907 | 4.92                       |
| 32               | 2.04             | 0.024          | 0.009          | GOTERM_BP_ALL   | GO:0048598--embryonic morphogenesis                              | 35    | 2.2%       | 2.04E-05 | 0.101      | 0.001     | 0.039  | 6.32                       |
|                  |                  |                |                | GOTERM_BP_ALL   | GO:0030326--embryonic limb morphogenesis                         | 12    | 0.7%       | 0.016    | 1          | 0.293     | 26.307 | 8.18                       |
|                  |                  |                |                | GOTERM_BP_ALL   | GO:0035113--embryonic appendage morphogenesis                    | 12    | 0.7%       | 0.016    | 1          | 0.293     | 26.307 | 8.18                       |
|                  |                  |                |                | GOTERM_BP_ALL   | GO:0048736--appendage development                                | 13    | 0.8%       | 0.024    | 1          | 0.372     | 37.682 | 7.99                       |
|                  |                  |                |                | GOTERM_BP_ALL   | GO:0060173--limb development                                     | 13    | 0.8%       | 0.024    | 1          | 0.372     | 37.682 | 7.99                       |
|                  |                  |                |                | GOTERM_BP_ALL   | GO:0035107--appendage morphogenesis                              | 12    | 0.7%       | 0.041    | 1          | 0.513     | 55.386 | 8.06                       |
|                  |                  |                |                | GOTERM_BP_ALL   | GO:0035108--limb morphogenesis                                   | 12    | 0.7%       | 0.041    | 1          | 0.513     | 55.386 | 8.06                       |
| 33               | 2.00             | 0.003          | 0.010          | GOTERM_BP_ALL   | GO:0048332--mesoderm morphogenesis                               | 9     | 0.6%       | 0.002    | 1          | 0.061     | 3.381  | 9.42                       |
|                  |                  |                |                | GOTERM_BP_ALL   | GO:0001704--formation of primary germ layer                      | 9     | 0.6%       | 0.002    | 1          | 0.061     | 3.381  | 9.42                       |
|                  |                  |                |                | GOTERM_BP_ALL   | GO:0007498--mesoderm development                                 | 12    | 0.7%       | 0.002    | 1          | 0.067     | 3.821  | 8.57                       |
|                  |                  |                |                | GOTERM_BP_ALL   | GO:0007369--gastrulation                                         | 13    | 0.8%       | 0.002    | 1          | 0.073     | 4.237  | 8.36                       |
|                  |                  |                |                | GOTERM_BP_ALL   | GO:0001707--mesoderm formation                                   | 8     | 0.5%       | 0.004    | 1          | 0.117     | 7.402  | 9.54                       |
|                  |                  |                |                | GOTERM_BP_ALL   | GO:0048729--tissue morphogenesis                                 | 13    | 0.8%       | 0.038    | 1          | 0.485     | 51.894 | 6.48                       |
|                  |                  |                |                | GOTERM_BP_ALL   | GO:0048340--paraxial mesoderm morphogenesis                      | 3     | 0.2%       | 0.165    | 1          | 0.868     | 96.790 | 10.89                      |
|                  |                  |                |                | GOTERM_BP_ALL   | GO:0048339--paraxial mesoderm development                        | 3     | 0.2%       | 0.258    | 1          | 0.935     | 99.664 | 10.60                      |
| 34               | 2.00             | 0.010          | 0.010          | GOTERM_BP_ALL   | GO:0007423--sensory organ development                            | 27    | 1.7%       | 0.006    | 1          | 0.156     | 11.316 | 6.70                       |
|                  |                  |                |                | GOTERM_BP_ALL   | GO:0042471--ear morphogenesis                                    | 12    | 0.7%       | 0.009    | 1          | 0.199     | 15.562 | 8.23                       |
|                  |                  |                |                | GOTERM_BP_ALL   | GO:0043583--ear development                                      | 14    | 0.9%       | 0.010    | 1          | 0.219     | 18.144 | 7.93                       |
|                  |                  |                |                | GOTERM_BP_ALL   | GO:0042472--inner ear morphogenesis                              | 11    | 0.7%       | 0.013    | 1          | 0.258     | 22.038 | 8.39                       |
|                  |                  |                |                | GOTERM_BP_ALL   | GO:0048839--inner ear development                                | 13    | 0.8%       | 0.014    | 1          | 0.265     | 22.946 | 8.06                       |
| 35               | 2.00             | 0.003          | 0.010          | GOTERM_BP_ALL   | GO:0030334--regulation of cell migration                         | 14    | 0.9%       | 0.002    | 1          | 0.056     | 2.918  | 8.13                       |
|                  |                  |                |                | GOTERM_BP_ALL   | GO:0051270--regulation of cell motility                          | 15    | 0.9%       | 0.002    | 1          | 0.063     | 3.557  | 7.87                       |
|                  |                  |                |                | GOTERM_BP_ALL   | GO:0040011--locomotion                                           | 16    | 1.0%       | 0.003    | 1          | 0.097     | 5.904  | 5.49                       |
|                  |                  |                |                | GOTERM_BP_ALL   | GO:0040012--regulation of locomotion                             | 15    | 0.9%       | 0.003    | 1          | 0.097     | 5.949  | 7.72                       |
|                  |                  |                |                | GOTERM_BP_ALL   | GO:0030335--positive regulation of cell migration                | 5     | 0.3%       | 0.045    | 1          | 0.537     | 58.666 | 9.89                       |
|                  |                  |                |                | GOTERM_BP_ALL   | GO:0051272--positive regulation of cell motility                 | 5     | 0.3%       | 0.088    | 1          | 0.719     | 82.730 | 9.60                       |
|                  |                  |                |                | GOTERM_BP_ALL   | GO:0040017--positive regulation of locomotion                    | 5     | 0.3%       | 0.088    | 1          | 0.719     | 82.730 | 9.20                       |
| 36               | 1.95             | 0.009          | 0.011          | GOTERM_BP_ALL   | GO:0048546--digestive tract morphogenesis                        | 7     | 0.4%       | 5.07E-04 | 0.928      | 0.020     | 0.964  | 10.36                      |
|                  |                  |                |                | GOTERM_BP_ALL   | GO:0048557--embryonic digestive tract morphogenesis              | 5     | 0.3%       | 0.004    | 1          | 0.115     | 7.462  | 10.74                      |
|                  |                  |                |                | GOTERM_BP_ALL   | GO:0048565--gut development                                      | 7     | 0.4%       | 0.004    | 1          | 0.120     | 7.841  | 9.89                       |
|                  |                  |                |                | GOTERM_BP_ALL   | GO:0048568--embryonic organ development                          | 10    | 0.6%       | 0.004    | 1          | 0.121     | 7.978  | 8.93                       |

**Supplemental Table 5. Functional Mapping of WT1 Target Genes using DAVID.**

| Functional Group | Enrichment Score                                 | Median P-Value | Geometric Mean | Category        | Term                                                               | Count | % of Total | P-Value  | Bonferroni | Benjamini | FDR    | Information Content (bits) |
|------------------|--------------------------------------------------|----------------|----------------|-----------------|--------------------------------------------------------------------|-------|------------|----------|------------|-----------|--------|----------------------------|
| 36               | 1.95                                             | 0.009          | 0.011          | GOTERM_BP_ALL   | GO:0048562--embryonic organ morphogenesis                          | 7     | 0.4%       | 0.007    | 1          | 0.174     | 12.773 | 9.60                       |
|                  |                                                  |                |                | GOTERM_BP_ALL   | GO:0048567--ectodermal gut morphogenesis                           | 5     | 0.3%       | 0.009    | 1          | 0.203     | 16.330 | 10.89                      |
|                  |                                                  |                |                | GOTERM_BP_ALL   | GO:0007439--ectodermal gut development                             | 5     | 0.3%       | 0.009    | 1          | 0.203     | 16.330 | 10.89                      |
|                  |                                                  |                |                | GOTERM_BP_ALL   | GO:0048547--gut morphogenesis                                      | 5     | 0.3%       | 0.013    | 1          | 0.258     | 22.181 | 10.60                      |
|                  |                                                  |                |                | GOTERM_BP_ALL   | GO:0048566--embryonic gut development                              | 5     | 0.3%       | 0.018    | 1          | 0.312     | 28.816 | 10.36                      |
|                  |                                                  |                |                | GOTERM_BP_ALL   | GO:0048558--embryonic gut morphogenesis                            | 4     | 0.3%       | 0.023    | 1          | 0.358     | 35.267 | 10.89                      |
|                  |                                                  |                |                | GOTERM_BP_ALL   | GO:0007440--foregut morphogenesis                                  | 3     | 0.2%       | 0.057    | 1          | 0.603     | 67.308 | 11.74                      |
|                  |                                                  |                |                | GOTERM_BP_ALL   | GO:0048613--embryonic ectodermal gut morphogenesis                 | 3     | 0.2%       | 0.081    | 1          | 0.704     | 79.966 | 11.47                      |
| GOTERM_BP_ALL    | GO:0048611--embryonic ectodermal gut development | 3              | 0.2%           | 0.081           | 1                                                                  | 0.704 | 79.966     | 11.47    |            |           |        |                            |
| 37               | 1.86                                             | 0.015          | 0.014          | GOTERM_BP_ALL   | GO:0022610--biological adhesion                                    | 76    | 4.7%       | 0.005    | 1          | 0.128     | 8.626  | 4.89                       |
|                  |                                                  |                |                | GOTERM_BP_ALL   | GO:0007155--cell adhesion                                          | 76    | 4.7%       | 0.005    | 1          | 0.128     | 8.626  | 4.89                       |
|                  |                                                  |                |                | GOTERM_BP_ALL   | GO:0016337--cell-cell adhesion                                     | 32    | 2.0%       | 0.026    | 1          | 0.385     | 39.221 | 6.27                       |
|                  |                                                  |                |                | SP_PIR_KEYWORDS | cell adhesion                                                      | 39    | 2.4%       | 0.064    | 1          | 0.573     | 63.923 | 5.71                       |
| 38               | 1.79                                             | 0.013          | 0.016          | INTERPRO        | IPR003659:Plexin/semaphorin/integrin                               | 11    | 0.7%       | 0.003    | 1          | 0.637     | 5.199  | 8.88                       |
|                  |                                                  |                |                | INTERPRO        | IPR002165:Plexin                                                   | 8     | 0.5%       | 0.009    | 1          | 0.886     | 15.757 | 9.51                       |
|                  |                                                  |                |                | INTERPRO        | IPR001627:Semaphorin/CD100 antigen                                 | 8     | 0.5%       | 0.011    | 1          | 0.893     | 18.657 | 9.45                       |
|                  |                                                  |                |                | SMART           | SM00423:PSI                                                        | 11    | 0.7%       | 0.013    | 1          | 0.726     | 17.266 | 8.88                       |
|                  |                                                  |                |                | UP_SEQ_FEATURE  | domain:Sema                                                        | 7     | 0.4%       | 0.029    | 1          | 1         | 46.201 | 9.84                       |
|                  |                                                  |                |                | SMART           | SM00630:Sema                                                       | 8     | 0.5%       | 0.032    | 1          | 0.755     | 38.166 | 9.45                       |
|                  |                                                  |                |                | PIR_SUPERFAMILY | PIRSF005526:semaphorin                                             | 4     | 0.3%       | 0.104    | 1          | 1         | 86.177 | 10.63                      |
| 39               | 1.78                                             | 0.035          | 0.017          | INTERPRO        | IPR003619:MAD homology 1, Dwarf-fin-type                           | 6     | 0.4%       | 0.003    | 1          | 0.636     | 4.880  | 10.39                      |
|                  |                                                  |                |                | SMART           | SM00523:DWA                                                        | 6     | 0.4%       | 0.007    | 0.983      | 0.871     | 9.505  | 10.39                      |
|                  |                                                  |                |                | INTERPRO        | IPR000647:CTF/NF-I                                                 | 3     | 0.2%       | 0.035    | 1          | 0.978     | 50.147 | 11.51                      |
|                  |                                                  |                |                | PIR_SUPERFAMILY | PIRSF018476:nuclear factor 1                                       | 3     | 0.2%       | 0.037    | 1          | 1         | 49.151 | 11.51                      |
|                  |                                                  |                |                | UP_SEQ_FEATURE  | DNA-binding region:CTF/NF-I                                        | 3     | 0.2%       | 0.058    | 1          | 1         | 71.818 | 11.77                      |
| 40               | 1.76                                             | 0.016          | 0.017          | INTERPRO        | IPR000697:EVH1                                                     | 5     | 0.3%       | 0.013    | 1          | 0.895     | 21.721 | 10.39                      |
|                  |                                                  |                |                | UP_SEQ_FEATURE  | domain:WH1                                                         | 5     | 0.3%       | 0.016    | 1          | 1         | 28.187 | 10.51                      |
|                  |                                                  |                |                | SMART           | SM00461:WH1                                                        | 5     | 0.3%       | 0.027    | 1          | 0.869     | 32.789 | 10.39                      |
| 41               | 1.75                                             | 0.024          | 0.018          | GOTERM_BP_ALL   | GO:0007267--cell-cell signaling                                    | 56    | 3.5%       | 1.29E-05 | 0.065      | 0.001     | 0.025  | 5.65                       |
|                  |                                                  |                |                | GOTERM_BP_ALL   | GO:0019226--transmission of nerve impulse                          | 34    | 2.1%       | 0.006    | 1          | 0.143     | 10.140 | 6.20                       |
|                  |                                                  |                |                | GOTERM_BP_ALL   | GO:0007268--synaptic transmission                                  | 27    | 1.7%       | 0.024    | 1          | 0.366     | 36.905 | 6.47                       |
|                  |                                                  |                |                | GOTERM_BP_ALL   | GO:0050877--neurological system process                            | 47    | 2.9%       | 1        | 1          | 1         | 100    | 3.61                       |
|                  |                                                  |                |                | GOTERM_BP_ALL   | GO:0003008--system process                                         | 56    | 3.5%       | 1        | 1          | 1         | 100    | 3.48                       |
| 42               | 1.75                                             | 0.016          | 0.018          | GOTERM_MF_ALL   | GO:0019901--protein kinase binding                                 | 13    | 0.8%       | 0.015    | 1          | 0.506     | 23.923 | 8.13                       |
|                  |                                                  |                |                | GOTERM_MF_ALL   | GO:0019900--kinase binding                                         | 14    | 0.9%       | 0.016    | 1          | 0.513     | 24.698 | 7.95                       |
|                  |                                                  |                |                | GOTERM_MF_ALL   | GO:0019899--enzyme binding                                         | 28    | 1.7%       | 0.023    | 1          | 0.580     | 34.051 | 6.46                       |
| 43               | 1.73                                             | 0.037          | 0.019          | GOTERM_BP_ALL   | GO:0007369--gastrulation                                           | 13    | 0.8%       | 0.002    | 1          | 0.073     | 4.237  | 8.36                       |
|                  |                                                  |                |                | GOTERM_BP_ALL   | GO:0010003--gastrulation (sensu Mammalia)                          | 6     | 0.4%       | 0.016    | 1          | 0.294     | 26.762 | 9.47                       |
|                  |                                                  |                |                | GOTERM_BP_ALL   | GO:0048276--gastrulation (sensu Vertebrata)                        | 6     | 0.4%       | 0.057    | 1          | 0.599     | 67.392 | 9.47                       |
|                  |                                                  |                |                | GOTERM_BP_ALL   | GO:0001702--gastrulation with mouth forming second                 | 6     | 0.4%       | 0.057    | 1          | 0.599     | 67.392 | 9.47                       |
| 44               | 1.73                                             | 0.017          | 0.019          | GOTERM_MF_ALL   | GO:0008194--UDP-glycosyltransferase activity                       | 20    | 1.2%       | 5.09E-04 | 0.748      | 0.058     | 0.903  | 7.49                       |
|                  |                                                  |                |                | GOTERM_MF_ALL   | GO:0004653--polypeptide N-acetylgalactosaminyltransferase activity | 7     | 0.4%       | 0.001    | 0.959      | 0.116     | 2.083  | 10.25                      |
|                  |                                                  |                |                | GOTERM_MF_ALL   | GO:0008376--acetylgalactosaminyltransferase activity               | 9     | 0.6%       | 0.002    | 0.993      | 0.147     | 3.190  | 9.36                       |
|                  |                                                  |                |                | UP_SEQ_FEATURE  | region of interest:Catalytic subdomain A                           | 7     | 0.4%       | 0.004    | 1          | 0.982     | 8.814  | 10.28                      |
|                  |                                                  |                |                | UP_SEQ_FEATURE  | region of interest:Catalytic subdomain B                           | 7     | 0.4%       | 0.004    | 1          | 0.982     | 8.814  | 10.28                      |
|                  |                                                  |                |                | INTERPRO        | IPR000772:Ricin B lectin                                           | 8     | 0.5%       | 0.005    | 1          | 0.737     | 8.826  | 9.63                       |
|                  |                                                  |                |                | GOTERM_MF_ALL   | GO:0030145--manganese ion binding                                  | 21    | 1.3%       | 0.005    | 1          | 0.317     | 9.338  | 7.13                       |
|                  |                                                  |                |                | UP_SEQ_FEATURE  | domain:Ricin B-type lectin                                         | 7     | 0.4%       | 0.006    | 1          | 0.986     | 12.201 | 10.18                      |
|                  |                                                  |                |                | SMART           | SM00458:RICIN                                                      | 8     | 0.5%       | 0.015    | 1          | 0.739     | 20.487 | 9.63                       |
|                  |                                                  |                |                | SP_PIR_KEYWORDS | Manganese                                                          | 19    | 1.2%       | 0.018    | 1          | 0.299     | 24.901 | 7.23                       |
|                  |                                                  |                |                | INTERPRO        | IPR001173:Glycosyl transferase, family 2                           | 6     | 0.4%       | 0.019    | 1          | 0.939     | 31.446 | 9.84                       |
|                  |                                                  |                |                | GOTERM_MF_ALL   | GO:0016758--transferase activity, transferring hexosyl groups      | 22    | 1.4%       | 0.020    | 1          | 0.559     | 30.691 | 6.85                       |
|                  |                                                  |                |                | KEGG_PATHWAY    | mmu01030:Glycan structures - biosynthesis 1                        | 19    | 1.2%       | 0.054    | 1          | 0.314     | 50.292 | 7.40                       |
|                  |                                                  |                |                | KEGG_PATHWAY    | mmu00512:O-Glycan biosynthesis                                     | 7     | 0.4%       | 0.067    | 1          | 0.346     | 58.054 | 9.39                       |
|                  |                                                  |                |                | PIR_SUPERFAMILY | PIRSF005670:polypeptide N-acetylgalactosaminyltransferase          | 3     | 0.2%       | 0.198    | 1          | 1         | 98.163 | 11.09                      |
|                  |                                                  |                |                | GOTERM_BP_ALL   | GO:0006493--protein amino acid O-linked glycosylation              | 3     | 0.2%       | 0.441    | 1          | 0.986     | 99.999 | 9.97                       |

**Supplemental Table 5. Functional Mapping of WT1 Target Genes using DAVID.**

| Functional Group | Enrichment Score | Median P-Value | Geometric Mean | Category        | Term                                                         | Count | % of Total | P-Value  | Bonferroni | Benjamini | FDR    | Information Content (bits) |
|------------------|------------------|----------------|----------------|-----------------|--------------------------------------------------------------|-------|------------|----------|------------|-----------|--------|----------------------------|
| 44               | 1.73             | 0.017          | 0.019          | SP_PIR_KEYWORDS | lectin                                                       | 13    | 0.8%       | 0.783    | 1          | 0.999     | 100    | 5.94                       |
|                  |                  |                |                | GOTERM_MF_ALL   | GO:0005529-sugar binding                                     | 14    | 0.9%       | 0.892    | 1          | 1         | 100    | 6.49                       |
| 45               | 1.72             | 0.015          | 0.019          | INTERPRO        | IPR000832:GPCR, family 2, secretin-like                      | 13    | 0.8%       | 0.001    | 0.998      | 0.505     | 2.067  | 8.63                       |
|                  |                  |                |                | INTERPRO        | IPR000539:Frizzled protein                                   | 5     | 0.3%       | 0.009    | 1          | 0.879     | 15.969 | 10.77                      |
|                  |                  |                |                | INTERPRO        | IPR015526:Frizzled related                                   | 6     | 0.4%       | 0.009    | 1          | 0.873     | 16.781 | 10.18                      |
|                  |                  |                |                | INTERPRO        | IPR000024:Frizzled CRD region                                | 7     | 0.4%       | 0.011    | 1          | 0.885     | 18.685 | 9.63                       |
|                  |                  |                |                | UP_SEQ_FEATURE  | domain:FZ                                                    | 7     | 0.4%       | 0.015    | 1          | 1         | 26.702 | 9.77                       |
|                  |                  |                |                | SMART           | SM00063:FRI                                                  | 7     | 0.4%       | 0.029    | 1          | 0.861     | 35.138 | 9.63                       |
|                  |                  |                |                | UP_SEQ_FEATURE  | short sequence motif:Lys-Thr-X-X-Trp motif                   | 4     | 0.3%       | 0.061    | 1          | 1         | 73.613 | 11.09                      |
|                  |                  |                |                | UP_SEQ_FEATURE  | short sequence motif:PDZ-binding                             | 11    | 0.7%       | 0.081    | 1          | 1         | 83.367 | 8.42                       |
|                  |                  |                |                | PIR_SUPERFAMILY | PIRSF006696:fruit fly frizzled protein                       | 3     | 0.2%       | 0.167    | 1          | 1         | 96.357 | 11.09                      |
| 46               | 1.71             | 0.046          | 0.019          | INTERPRO        | IPR001202:WW/Rsp5/WWP                                        | 12    | 0.7%       | 0.002    | 1          | 0.633     | 3.569  | 8.63                       |
|                  |                  |                |                | SMART           | SM00456:WW                                                   | 12    | 0.7%       | 0.012    | 1          | 0.828     | 15.773 | 8.60                       |
|                  |                  |                |                | UP_SEQ_FEATURE  | domain:WW 1                                                  | 5     | 0.3%       | 0.081    | 1          | 1         | 83.194 | 10.18                      |
|                  |                  |                |                | UP_SEQ_FEATURE  | domain:WW 2                                                  | 5     | 0.3%       | 0.081    | 1          | 1         | 83.194 | 10.18                      |
| 47               | 1.71             | 0.043          | 0.020          | GOTERM_MF_ALL   | GO:0003682-chromatin binding                                 | 21    | 1.3%       | 0.001    | 0.970      | 0.122     | 2.279  | 7.32                       |
|                  |                  |                |                | INTERPRO        | IPR000953:Chromo                                             | 7     | 0.4%       | 0.019    | 1          | 0.940     | 30.996 | 9.51                       |
|                  |                  |                |                | SMART           | SM00298:CHROMO                                               | 7     | 0.4%       | 0.066    | 1          | 0.862     | 63.721 | 9.51                       |
|                  |                  |                |                | UP_SEQ_FEATURE  | domain:Chromo 1                                              | 3     | 0.2%       | 0.090    | 1          | 1         | 86.451 | 12.09                      |
| 48               | 1.68             | 0.019          | 0.021          | GOTERM_BP_ALL   | GO:0045665-negative regulation of neuron differentiation     | 6     | 0.4%       | 0.016    | 1          | 0.294     | 26.762 | 9.81                       |
|                  |                  |                |                | GOTERM_BP_ALL   | GO:0045664-regulation of neuron differentiation              | 8     | 0.5%       | 0.019    | 1          | 0.318     | 30.022 | 7.93                       |
|                  |                  |                |                | GOTERM_BP_ALL   | GO:0048663-neuron fate commitment                            | 6     | 0.4%       | 0.030    | 1          | 0.423     | 43.964 | 9.60                       |
| 49               | 1.67             | 0.030          | 0.022          | INTERPRO        | IPR001965:Zinc finger, PHD-type                              | 16    | 1.0%       | 0.003    | 1          | 0.631     | 5.435  | 8.18                       |
|                  |                  |                |                | SMART           | SM00249:PHD                                                  | 16    | 1.0%       | 0.030    | 1          | 0.839     | 35.916 | 8.11                       |
|                  |                  |                |                | UP_SEQ_FEATURE  | zinc finger region:PHD-type                                  | 6     | 0.4%       | 0.117    | 1          | 1         | 92.904 | 8.77                       |
| 50               | 1.64             | 0.081          | 0.023          | GOTERM_BP_ALL   | GO:0001649-osteoblast differentiation                        | 9     | 0.6%       | 0.002    | 1          | 0.061     | 3.381  | 9.30                       |
|                  |                  |                |                | GOTERM_BP_ALL   | GO:0045668-negative regulation of osteoblast differentiation | 3     | 0.2%       | 0.081    | 1          | 0.704     | 79.966 | 11.47                      |
|                  |                  |                |                | GOTERM_BP_ALL   | GO:0045667-regulation of osteoblast differentiation          | 4     | 0.3%       | 0.085    | 1          | 0.714     | 81.531 | 10.47                      |
| 51               | 1.62             | 0.017          | 0.024          | INTERPRO        | IPR011511:Variant SH3                                        | 11    | 0.7%       | 0.011    | 1          | 0.877     | 18.707 | 8.51                       |
|                  |                  |                |                | SP_PIR_KEYWORDS | SH3 domain                                                   | 27    | 1.7%       | 0.016    | 1          | 0.276     | 21.522 | 6.59                       |
|                  |                  |                |                | INTERPRO        | IPR001452:Src homology-3                                     | 25    | 1.6%       | 0.017    | 1          | 0.946     | 27.916 | 6.70                       |
|                  |                  |                |                | UP_SEQ_FEATURE  | domain:SH3                                                   | 19    | 1.2%       | 0.054    | 1          | 1         | 68.887 | 7.15                       |
|                  |                  |                |                | SMART           | SM00326:SH3                                                  | 28    | 1.7%       | 0.056    | 1          | 0.827     | 57.561 | 6.63                       |
| 52               | 1.60             | 0.015          | 0.025          | GOTERM_BP_ALL   | GO:0001655-urogenital system development                     | 14    | 0.9%       | 0.013    | 1          | 0.256     | 21.831 | 7.83                       |
|                  |                  |                |                | GOTERM_BP_ALL   | GO:0001656-metanephros development                           | 10    | 0.6%       | 0.015    | 1          | 0.281     | 24.760 | 8.51                       |
|                  |                  |                |                | GOTERM_BP_ALL   | GO:0001822-kidney development                                | 13    | 0.8%       | 0.015    | 1          | 0.285     | 25.145 | 7.99                       |
|                  |                  |                |                | GOTERM_BP_ALL   | GO:0001657-ureteric bud development                          | 8     | 0.5%       | 0.019    | 1          | 0.318     | 30.022 | 8.97                       |
|                  |                  |                |                | GOTERM_BP_ALL   | GO:0001658-ureteric bud branching                            | 4     | 0.3%       | 0.201    | 1          | 0.902     | 98.612 | 9.74                       |
| 53               | 1.55             | 0.118          | 0.028          | UP_SEQ_FEATURE  | zinc finger region:C2H2-type 2                               | 29    | 1.8%       | 2.05E-04 | 0.951      | 0.778     | 0.433  | 7.10                       |
|                  |                  |                |                | UP_SEQ_FEATURE  | zinc finger region:C2H2-type 3                               | 27    | 1.7%       | 5.31E-04 | 1          | 0.623     | 1.120  | 7.18                       |
|                  |                  |                |                | UP_SEQ_FEATURE  | zinc finger region:C2H2-type 1                               | 27    | 1.7%       | 0.001    | 1          | 0.805     | 2.327  | 7.10                       |
|                  |                  |                |                | UP_SEQ_FEATURE  | zinc finger region:C2H2-type 4                               | 20    | 1.2%       | 0.006    | 1          | 0.988     | 11.415 | 7.54                       |
|                  |                  |                |                | UP_SEQ_FEATURE  | zinc finger region:C2H2-type 5                               | 13    | 0.8%       | 0.118    | 1          | 1         | 92.969 | 7.86                       |
|                  |                  |                |                | INTERPRO        | IPR007087:Zinc finger, C2H2-type                             | 51    | 3.2%       | 0.209    | 1          | 1         | 98.939 | 5.44                       |
|                  |                  |                |                | INTERPRO        | IPR015880:Zinc finger, C2H2-like                             | 33    | 2.1%       | 0.688    | 1          | 1         | 100    | 5.88                       |
|                  |                  |                |                | INTERPRO        | IPR013087:Zinc finger, C2H2-type/integrase, DNA-binding      | 24    | 1.5%       | 0.884    | 1          | 1         | 100    | 6.16                       |
|                  |                  |                |                | SMART           | SM00355:ZnF_C2H2                                             | 35    | 2.2%       | 0.983    | 1          | 1         | 100    | 5.74                       |
| 54               | 1.53             | 0.029          | 0.029          | SP_PIR_KEYWORDS | mitogen                                                      | 8     | 0.5%       | 0.023    | 1          | 0.325     | 30.118 | 8.11                       |
|                  |                  |                |                | SP_PIR_KEYWORDS | growth factor                                                | 18    | 1.1%       | 0.029    | 1          | 0.356     | 36.144 | 6.13                       |
|                  |                  |                |                | GOTERM_MF_ALL   | GO:0008083-growth factor activity                            | 21    | 1.3%       | 0.039    | 1          | 0.720     | 50.546 | 6.77                       |
| 55               | 1.53             | 0.041          | 0.030          | INTERPRO        | IPR011333:BTB/POZ fold                                       | 23    | 1.4%       | 0.005    | 1          | 0.750     | 9.557  | 7.07                       |
|                  |                  |                |                | INTERPRO        | IPR000210:BTB/POZ-like                                       | 22    | 1.4%       | 0.009    | 1          | 0.871     | 16.099 | 7.10                       |
|                  |                  |                |                | SMART           | SM00225:BTB                                                  | 24    | 1.5%       | 0.041    | 1          | 0.775     | 46.185 | 7.06                       |
|                  |                  |                |                | INTERPRO        | IPR013069:BTB/POZ                                            | 15    | 0.9%       | 0.054    | 1          | 0.979     | 65.802 | 7.67                       |
|                  |                  |                |                | UP_SEQ_FEATURE  | domain:BTB                                                   | 9     | 0.6%       | 0.222    | 1          | 1         | 99.507 | 8.42                       |

**Supplemental Table 5. Functional Mapping of WT1 Target Genes using DAVID.**

| Functional Group | Enrichment Score | Median P-Value | Geometric Mean | Category        | Term                                                                                 | Count | % of Total | P-Value         | Bonferroni                                  | Benjamini | FDR    | Information Content (bits) |   |       |        |       |
|------------------|------------------|----------------|----------------|-----------------|--------------------------------------------------------------------------------------|-------|------------|-----------------|---------------------------------------------|-----------|--------|----------------------------|---|-------|--------|-------|
| 56               | 1.51             | 0.036          | 0.031          | SP_PIR_KEYWORDS | protein phosphatase                                                                  | 21    | 1.3%       | 4.59E-04        | 0.328                                       | 0.020     | 0.710  | 6.94                       |   |       |        |       |
|                  |                  |                |                | INTERPRO        | IPR008343:MAP kinase phosphatase                                                     | 5     | 0.3%       | 0.004           | 1                                           | 0.701     | 7.280  | 10.92                      |   |       |        |       |
|                  |                  |                |                | INTERPRO        | IPR014393:Dual specificity protein phosphatase (MAP kinase phosphatase)              | 4     | 0.3%       | 0.005           | 1                                           | 0.749     | 8.718  | 11.77                      |   |       |        |       |
|                  |                  |                |                | GOTERM_MF_ALL   | GO:0004721~phosphoprotein phosphatase activity                                       | 24    | 1.5%       | 0.005           | 1                                           | 0.323     | 9.294  | 7.00                       |   |       |        |       |
|                  |                  |                |                | GOTERM_MF_ALL   | GO:0017017~MAP kinase tyrosine/serine/threonine phosphatase activity                 | 5     | 0.3%       | 0.006           | 1                                           | 0.350     | 10.728 | 10.89                      |   |       |        |       |
|                  |                  |                |                | GOTERM_MF_ALL   | GO:0033549~MAP kinase phosphatase activity                                           | 5     | 0.3%       | 0.006           | 1                                           | 0.350     | 10.728 | 10.89                      |   |       |        |       |
|                  |                  |                |                | GOTERM_MF_ALL   | GO:0042578~phosphoric ester hydrolase activity                                       | 40    | 2.5%       | 0.007           | 1                                           | 0.358     | 12.044 | 5.94                       |   |       |        |       |
|                  |                  |                |                | GOTERM_MF_ALL   | GO:0016791~phosphoric monoester hydrolase activity                                   | 33    | 2.1%       | 0.009           | 1                                           | 0.399     | 14.849 | 6.31                       |   |       |        |       |
|                  |                  |                |                | GOTERM_MF_ALL   | GO:0004725~protein tyrosine phosphatase activity                                     | 16    | 1.0%       | 0.010           | 1                                           | 0.425     | 16.932 | 7.77                       |   |       |        |       |
|                  |                  |                |                | UP_SEQ_FEATURE  | active site:Phosphocysteine intermediate                                             | 13    | 0.8%       | 0.011           | 1                                           | 0.999     | 20.883 | 8.51                       |   |       |        |       |
|                  |                  |                |                | UP_SEQ_FEATURE  | domain:Rhodanese                                                                     | 5     | 0.3%       | 0.031           | 1                                           | 1         | 48.450 | 10.28                      |   |       |        |       |
|                  |                  |                |                | GOTERM_BP_ALL   | GO:0006470~protein amino acid dephosphorylation                                      | 18    | 1.1%       | 0.032           | 1                                           | 0.444     | 46.635 | 7.25                       |   |       |        |       |
|                  |                  |                |                | BIOCARTA        | m_dspPathway:Regulation of MAP Kinase Pathways Through Dual Specificity Phosphatases | 5     | 0.3%       | 0.034           | 1                                           | 0.802     | 36.418 | 10.63                      |   |       |        |       |
|                  |                  |                |                | INTERPRO        | IPR000340:Protein-tyrosine phosphatase, dual specificity                             | 7     | 0.4%       | 0.036           | 1                                           | 0.977     | 50.676 | 9.18                       |   |       |        |       |
|                  |                  |                |                | PIR_SUPERFAMILY | PIRSF000939:dual specificity protein phosphatase (MAP kinase phosphatase)            | 3     | 0.2%       | 0.037           | 1                                           | 1         | 49.151 | 12.09                      |   |       |        |       |
|                  |                  |                |                | INTERPRO        | IPR000387:Protein-tyrosine phosphatase, Tyr-specific/dual-specificity type           | 13    | 0.8%       | 0.041           | 1                                           | 0.979     | 55.667 | 7.90                       |   |       |        |       |
|                  |                  |                |                | GOTERM_BP_ALL   | GO:0016311~dephosphorylation                                                         | 19    | 1.2%       | 0.050           | 1                                           | 0.567     | 62.559 | 7.11                       |   |       |        |       |
|                  |                  |                |                | INTERPRO        | IPR001763:Rhodanese-like                                                             | 5     | 0.3%       | 0.053           | 1                                           | 0.982     | 64.942 | 9.92                       |   |       |        |       |
|                  |                  |                |                | UP_SEQ_FEATURE  | domain:Tyrosine-protein phosphatase                                                  | 9     | 0.6%       | 0.088           | 1                                           | 1         | 85.656 | 8.54                       |   |       |        |       |
|                  |                  |                |                | SMART           | SM00195:DSPc                                                                         | 7     | 0.4%       | 0.098           | 1                                           | 0.918     | 78.243 | 9.14                       |   |       |        |       |
|                  |                  |                |                | GOTERM_MF_ALL   | GO:0008138~protein tyrosine/serine/threonine phosphatase activity                    | 7     | 0.4%       | 0.106           | 1                                           | 0.938     | 86.431 | 8.85                       |   |       |        |       |
|                  |                  |                |                | SMART           | SM00450:RHOD                                                                         | 5     | 0.3%       | 0.118           | 1                                           | 0.922     | 84.483 | 9.84                       |   |       |        |       |
|                  |                  |                |                | GOTERM_MF_ALL   | GO:0016788~hydrolase activity, acting on ester bonds                                 | 66    | 4.1%       | 0.121           | 1                                           | 0.943     | 89.915 | 4.89                       |   |       |        |       |
|                  |                  |                |                | INTERPRO        | IPR000242:Protein-tyrosine phosphatase, receptor/non-receptor type                   | 6     | 0.4%       | 0.284           | 1                                           | 1         | 99.844 | 9.05                       |   |       |        |       |
|                  |                  |                |                | SP_PIR_KEYWORDS | phosphoric monoester hydrolase                                                       | 6     | 0.4%       | 0.323           | 1                                           | 0.918     | 99.763 | 8.67                       |   |       |        |       |
|                  |                  |                |                | SP_PIR_KEYWORDS | tyrosine-specific phosphatase                                                        | 4     | 0.3%       | 0.362           | 1                                           | 0.941     | 99.907 | 9.51                       |   |       |        |       |
|                  |                  |                |                | SMART           | SM00194:PTPc                                                                         | 6     | 0.4%       | 0.483           | 1                                           | 0.986     | 99.994 | 9.05                       |   |       |        |       |
|                  |                  |                |                | 57              | 1.49                                                                                 | 0.019 | 0.032      | INTERPRO        | IPR013088:Zinc finger, NHR/GATA-type        | 9         | 0.6%   | 0.012                      | 1 | 0.892 | 20.377 | 8.77  |
|                  |                  |                |                |                 |                                                                                      |       |            | INTERPRO        | IPR013629:Zinc finger-associated region     | 3         | 0.2%   | 0.019                      | 1 | 0.946 | 30.556 | 12.09 |
|                  |                  |                |                |                 |                                                                                      |       |            | PIR_SUPERFAMILY | PIRSF500849:orphan nuclear receptor COUP-TF | 3         | 0.2%   | 0.019                      | 1 | 1     | 29.851 | 12.09 |
|                  |                  |                |                |                 |                                                                                      |       |            | INTERPRO        | IPR003068:Transcription factor COUP         | 3         | 0.2%   | 0.035                      | 1 | 0.978 | 50.147 | 11.77 |
|                  |                  |                |                |                 |                                                                                      |       |            | PIR_SUPERFAMILY | PIRSF002534:retinoic acid receptor alpha    | 3         | 0.2%   | 0.230                      | 1 | 1     | 99.110 | 10.51 |
| 58               | 1.48             | 0.100          | 0.033          | INTERPRO        | IPR011993:Pleckstrin homology-type                                                   | 36    | 2.2%       | 4.62E-04        | 0.934                                       | 0.419     | 0.890  | 6.31                       |   |       |        |       |
|                  |                  |                |                | INTERPRO        | IPR001849:Pleckstrin-like                                                            | 25    | 1.6%       | 0.06            | 1                                           | 0.980     | 70.064 | 6.57                       |   |       |        |       |
|                  |                  |                |                | SMART           | SM00233:PH                                                                           | 29    | 1.8%       | 0.14            | 1                                           | 0.908     | 89.062 | 6.47                       |   |       |        |       |
|                  |                  |                |                | UP_SEQ_FEATURE  | domain:PH                                                                            | 14    | 0.9%       | 0.30            | 1                                           | 1         | 99.954 | 7.27                       |   |       |        |       |
| 59               | 1.45             | 0.047          | 0.036          | GOTERM_BP_ALL   | GO:0051098~regulation of binding                                                     | 8     | 0.5%       | 0.01            | 1                                           | 0.203     | 16.386 | 8.39                       |   |       |        |       |
|                  |                  |                |                | GOTERM_BP_ALL   | GO:0051101~regulation of DNA binding                                                 | 5     | 0.3%       | 0.01            | 1                                           | 0.258     | 22.181 | 8.85                       |   |       |        |       |
|                  |                  |                |                | GOTERM_BP_ALL   | GO:0043388~positive regulation of DNA binding                                        | 3     | 0.2%       | 0.08            | 1                                           | 0.704     | 79.966 | 9.30                       |   |       |        |       |
|                  |                  |                |                | GOTERM_BP_ALL   | GO:0051099~positive regulation of binding                                            | 3     | 0.2%       | 0.16            | 1                                           | 0.868     | 96.790 | 9.15                       |   |       |        |       |
| 60               | 1.42             | 0.042          | 0.038          | SP_PIR_KEYWORDS | mitogen                                                                              | 8     | 0.5%       | 0.02            | 1                                           | 0.325     | 30.118 | 8.11                       |   |       |        |       |
|                  |                  |                |                | INTERPRO        | IPR000072:Platelet-derived growth factor (PDGF)                                      | 4     | 0.3%       | 0.03            | 1                                           | 0.977     | 45.489 | 10.51                      |   |       |        |       |
|                  |                  |                |                | GOTERM_BP_ALL   | GO:0050730~regulation of peptidyl-tyrosine phosphorylation                           | 8     | 0.5%       | 0.05            | 1                                           | 0.583     | 64.481 | 8.93                       |   |       |        |       |
|                  |                  |                |                | SMART           | SM00141:PDGF                                                                         | 4     | 0.3%       | 0.05            | 1                                           | 0.832     | 56.266 | 10.51                      |   |       |        |       |
| 61               | 1.41             | 0.037          | 0.039          | GOTERM_BP_ALL   | GO:0050770~regulation of axonogenesis                                                | 9     | 0.6%       | 0.008           | 1                                           | 0.180     | 13.560 | 8.93                       |   |       |        |       |
|                  |                  |                |                | GOTERM_BP_ALL   | GO:0050767~regulation of neurogenesis                                                | 10    | 0.6%       | 0.027           | 1                                           | 0.400     | 40.854 | 7.62                       |   |       |        |       |
|                  |                  |                |                | GOTERM_BP_ALL   | GO:0030516~regulation of axon extension                                              | 5     | 0.3%       | 0.037           | 1                                           | 0.479     | 51.223 | 9.81                       |   |       |        |       |
|                  |                  |                |                | GOTERM_BP_ALL   | GO:0050772~positive regulation of axonogenesis                                       | 5     | 0.3%       | 0.037           | 1                                           | 0.479     | 51.223 | 10.15                      |   |       |        |       |
|                  |                  |                |                | GOTERM_BP_ALL   | GO:0048675~axon extension                                                            | 6     | 0.4%       | 0.049           | 1                                           | 0.564     | 61.863 | 9.36                       |   |       |        |       |
|                  |                  |                |                | GOTERM_BP_ALL   | GO:0050769~positive regulation of neurogenesis                                       | 5     | 0.3%       | 0.088           | 1                                           | 0.719     | 82.730 | 9.11                       |   |       |        |       |
|                  |                  |                |                | GOTERM_BP_ALL   | GO:0045773~positive regulation of axon extension                                     | 3     | 0.2%       | 0.107           | 1                                           | 0.776     | 88.493 | 11.06                      |   |       |        |       |
| 62               | 1.41             | 0.058          | 0.039          | GOTERM_MF_ALL   | GO:0008603~cAMP-dependent protein kinase regulator activity                          | 6     | 0.4%       | 0.002           | 0.992                                       | 0.150     | 3.153  | 10.47                      |   |       |        |       |
|                  |                  |                |                | INTERPRO        | IPR002373:cAMP/cGMP-dependent protein kinase                                         | 5     | 0.3%       | 0.002           | 1                                           | 0.621     | 4.384  | 10.92                      |   |       |        |       |
|                  |                  |                |                | GOTERM_MF_ALL   | GO:0019887~protein kinase regulator activity                                         | 14    | 0.9%       | 0.003           | 1                                           | 0.221     | 5.580  | 8.06                       |   |       |        |       |
|                  |                  |                |                | GOTERM_MF_ALL   | GO:0016208~AMP binding                                                               | 6     | 0.4%       | 0.008           | 1                                           | 0.365     | 12.566 | 10.25                      |   |       |        |       |



**Supplemental Table 5. Functional Mapping of WT1 Target Genes using DAVID.**

| Functional Group | Enrichment Score                           | Median P-Value | Geometric Mean | Category        | Term                                                                     | Count | % of Total | P-Value       | Bonferroni                      | Benjamini | FDR    | Information Content (bits) |
|------------------|--------------------------------------------|----------------|----------------|-----------------|--------------------------------------------------------------------------|-------|------------|---------------|---------------------------------|-----------|--------|----------------------------|
| 62               | 1.41                                       | 0.058          | 0.039          | INTERPRO        | IPR003117:cAMP-dependent protein kinase regulator, type II PKA R subunit | 4     | 0.3%       | 0.022         | 1                               | 0.951     | 34.824 | 11.28                      |
|                  |                                            |                |                | INTERPRO        | IPR012198:cAMP-dependent protein kinase regulatory subunit               | 3     | 0.2%       | 0.035         | 1                               | 0.978     | 50.147 | 12.09                      |
|                  |                                            |                |                | PIR_SUPERFAMILY | PIRSF000548:cAMP-dependent protein kinase, regulatory subunit            | 3     | 0.2%       | 0.037         | 1                               | 1.000     | 49.151 | 12.09                      |
|                  |                                            |                |                | SMART           | SM00394:RIIa                                                             | 4     | 0.3%       | 0.039         | 1                               | 0.780     | 44.590 | 11.28                      |
|                  |                                            |                |                | UP_SEQ_FEATURE  | binding site:cAMP 2                                                      | 3     | 0.2%       | 0.058         | 1                               | 1         | 71.818 | 12.09                      |
|                  |                                            |                |                | UP_SEQ_FEATURE  | binding site:cAMP 1                                                      | 3     | 0.2%       | 0.058         | 1                               | 1         | 71.818 | 12.09                      |
|                  |                                            |                |                | UP_SEQ_FEATURE  | region of interest:Dimerization and phosphorylation                      | 3     | 0.2%       | 0.058         | 1                               | 1         | 71.818 | 12.09                      |
|                  |                                            |                |                | SP_PIR_KEYWORDS | camp-binding                                                             | 4     | 0.3%       | 0.061         | 1                               | 0.575     | 62.468 | 10.77                      |
|                  |                                            |                |                | GOTERM_MF_ALL   | GO:0030552~cAMP binding                                                  | 4     | 0.3%       | 0.069         | 1                               | 0.868     | 72.223 | 10.74                      |
|                  |                                            |                |                | GOTERM_MF_ALL   | GO:0030551~cyclic nucleotide binding                                     | 5     | 0.3%       | 0.088         | 1                               | 0.912     | 80.687 | 9.81                       |
|                  |                                            |                |                | UP_SEQ_FEATURE  | nucleotide phosphate-binding region:cAMP 1                               | 3     | 0.2%       | 0.090         | 1                               | 1         | 86.451 | 11.77                      |
|                  |                                            |                |                | UP_SEQ_FEATURE  | nucleotide phosphate-binding region:cAMP 2                               | 3     | 0.2%       | 0.090         | 1                               | 1         | 86.451 | 11.77                      |
|                  |                                            |                |                | SP_PIR_KEYWORDS | camp                                                                     | 5     | 0.3%       | 0.113         | 1                               | 0.707     | 84.512 | 9.05                       |
|                  |                                            |                |                | INTERPRO        | IPR014710:RmlC-like jelly roll fold                                      | 5     | 0.3%       | 0.156         | 1                               | 0.999     | 96.207 | 9.63                       |
|                  |                                            |                |                | INTERPRO        | IPR000595:Cyclic nucleotide-binding                                      | 5     | 0.3%       | 0.188         | 1                               | 0.999     | 98.235 | 9.39                       |
|                  |                                            |                |                | SMART           | SM00100:cNMP                                                             | 5     | 0.3%       | 0.360         | 1                               | 0.972     | 99.865 | 9.34                       |
|                  |                                            |                |                | 63              | 1.35                                                                     | 0.032 | 0.045      | GOTERM_BP_ALL | GO:0031016~pancreas development | 5         | 0.3%   | 0.023                      |
| GOTERM_BP_ALL    | GO:0031018~endocrine pancreas development  | 4              | 0.3%           |                 |                                                                          |       |            | 0.032         | 1                               | 0.441     | 45.995 | 10.89                      |
| GOTERM_BP_ALL    | GO:0035270~endocrine system development    | 8              | 0.5%           |                 |                                                                          |       |            | 0.121         | 1                               | 0.804     | 91.509 | 8.42                       |
| 64               | 1.33                                       | 0.056          | 0.046          | GOTERM_MF_ALL   | GO:0005262~calcium channel activity                                      | 15    | 0.9%       | 0.002         | 0.995                           | 0.146     | 3.376  | 8.15                       |
|                  |                                            |                |                | SP_PIR_KEYWORDS | Calcium channel                                                          | 12    | 0.7%       | 0.002         | 0.826                           | 0.068     | 3.081  | 8.70                       |
|                  |                                            |                |                | GOTERM_BP_ALL   | GO:0006816~calcium ion transport                                         | 19    | 1.2%       | 0.009         | 1                               | 0.199     | 15.658 | 7.35                       |
|                  |                                            |                |                | GOTERM_MF_ALL   | GO:0046873~metal ion transmembrane transporter activity                  | 38    | 2.4%       | 0.010         | 1                               | 0.414     | 15.820 | 5.93                       |
|                  |                                            |                |                | GOTERM_MF_ALL   | GO:0022843~voltage-gated cation channel activity                         | 20    | 1.2%       | 0.011         | 1                               | 0.426     | 17.278 | 7.16                       |
|                  |                                            |                |                | GOTERM_MF_ALL   | GO:0005261~cation channel activity                                       | 33    | 2.1%       | 0.014         | 1                               | 0.478     | 21.986 | 6.17                       |
|                  |                                            |                |                | SP_PIR_KEYWORDS | calcium transport                                                        | 12    | 0.7%       | 0.019         | 1                               | 0.303     | 25.659 | 8.23                       |
|                  |                                            |                |                | GOTERM_MF_ALL   | GO:0005244~voltage-gated ion channel activity                            | 24    | 1.5%       | 0.020         | 1                               | 0.563     | 30.192 | 6.74                       |
|                  |                                            |                |                | GOTERM_MF_ALL   | GO:0022832~voltage-gated channel activity                                | 24    | 1.5%       | 0.020         | 1                               | 0.563     | 30.192 | 6.74                       |
|                  |                                            |                |                | GOTERM_MF_ALL   | GO:0022836~gated channel activity                                        | 34    | 2.1%       | 0.021         | 1                               | 0.556     | 30.858 | 6.09                       |
|                  |                                            |                |                | SP_PIR_KEYWORDS | Ionic channel                                                            | 36    | 2.2%       | 0.021         | 1                               | 0.311     | 27.848 | 5.98                       |
|                  |                                            |                |                | GOTERM_MF_ALL   | GO:0005216~ion channel activity                                          | 42    | 2.6%       | 0.022         | 1                               | 0.573     | 32.798 | 5.70                       |
|                  |                                            |                |                | GOTERM_MF_ALL   | GO:0022838~substrate specific channel activity                           | 43    | 2.7%       | 0.023         | 1                               | 0.577     | 33.445 | 5.65                       |
|                  |                                            |                |                | INTERPRO        | IPR003131:Potassium channel, voltage dependent, Kv, tetramerisation      | 9     | 0.6%       | 0.024         | 1                               | 0.956     | 36.986 | 8.63                       |
|                  |                                            |                |                | GOTERM_BP_ALL   | GO:0015674~di-, tri-valent inorganic cation transport                    | 21    | 1.3%       | 0.028         | 1                               | 0.415     | 42.424 | 6.96                       |
|                  |                                            |                |                | GOTERM_MF_ALL   | GO:0005245~voltage-gated calcium channel activity                        | 6     | 0.4%       | 0.036         | 1                               | 0.700     | 47.822 | 9.81                       |
|                  |                                            |                |                | GOTERM_MF_ALL   | GO:0005249~voltage-gated potassium channel activity                      | 14    | 0.9%       | 0.050         | 1                               | 0.790     | 59.872 | 7.55                       |
|                  |                                            |                |                | GOTERM_MF_ALL   | GO:0015267~channel activity                                              | 44    | 2.7%       | 0.054         | 1                               | 0.808     | 62.742 | 5.52                       |
|                  |                                            |                |                | GOTERM_MF_ALL   | GO:0022803~passive transmembrane transporter activity                    | 44    | 2.7%       | 0.054         | 1                               | 0.808     | 62.742 | 5.52                       |
|                  |                                            |                |                | GOTERM_BP_ALL   | GO:0006811~ion transport                                                 | 78    | 4.8%       | 0.054         | 1                               | 0.591     | 65.566 | 4.59                       |
|                  |                                            |                |                | SP_PIR_KEYWORDS | ion transport                                                            | 51    | 3.2%       | 0.056         | 1                               | 0.553     | 59.099 | 5.22                       |
|                  |                                            |                |                | GOTERM_MF_ALL   | GO:0030955~potassium ion binding                                         | 15    | 0.9%       | 0.062         | 1                               | 0.843     | 68.209 | 7.32                       |
|                  |                                            |                |                | GOTERM_BP_ALL   | GO:0030001~metal ion transport                                           | 46    | 2.9%       | 0.068         | 1                               | 0.653     | 74.119 | 5.44                       |
|                  |                                            |                |                | INTERPRO        | IPR003968:Potassium channel, voltage dependent, Kv                       | 5     | 0.3%       | 0.098         | 1                               | 0.996     | 86.339 | 9.63                       |
|                  |                                            |                |                | GOTERM_MF_ALL   | GO:0022892~substrate-specific transporter activity                       | 96    | 6.0%       | 0.107         | 1                               | 0.938     | 86.616 | 4.22                       |
|                  |                                            |                |                | GOTERM_MF_ALL   | GO:0022891~substrate-specific transmembrane transporter activity         | 77    | 4.8%       | 0.114         | 1                               | 0.942     | 88.419 | 4.55                       |
|                  |                                            |                |                | SP_PIR_KEYWORDS | voltage-gated channel                                                    | 16    | 1.0%       | 0.119         | 1                               | 0.714     | 86.084 | 7.17                       |
|                  |                                            |                |                | GOTERM_MF_ALL   | GO:0008324~cation transmembrane transporter activity                     | 52    | 3.2%       | 0.121         | 1                               | 0.943     | 89.830 | 5.06                       |
|                  |                                            |                |                | GOTERM_BP_ALL   | GO:0006812~cation transport                                              | 53    | 3.3%       | 0.126         | 1                               | 0.814     | 92.289 | 5.15                       |
|                  |                                            |                |                | INTERPRO        | IPR005821:Ion transport                                                  | 13    | 0.8%       | 0.129         | 1                               | 0.998     | 93.157 | 7.57                       |
|                  |                                            |                |                | GOTERM_MF_ALL   | GO:0005267~potassium channel activity                                    | 16    | 1.0%       | 0.148         | 1                               | 0.967     | 94.254 | 7.09                       |
|                  |                                            |                |                | GOTERM_MF_ALL   | GO:0015075~ion transmembrane transporter activity                        | 66    | 4.1%       | 0.154         | 1                               | 0.971     | 94.950 | 4.71                       |
| SP_PIR_KEYWORDS  | potassium                                  | 13             | 0.8%           | 0.161           | 1                                                                        | 0.795 | 93.424     | 7.20          |                                 |           |        |                            |
| GOTERM_MF_ALL    | GO:0031420~alkali metal ion binding        | 20             | 1.2%           | 0.172           | 1                                                                        | 0.976 | 96.539     | 6.61          |                                 |           |        |                            |
| SP_PIR_KEYWORDS  | transport                                  | 121            | 7.5%           | 0.233           | 1                                                                        | 0.869 | 98.368     | 3.66          |                                 |           |        |                            |
| PIR_SUPERFAMILY  | PIRSF002449:potassium channel protein Drk1 | 3              | 0.2%           | 0.261           | 1                                                                        | 1     | 99.585     | 10.51         |                                 |           |        |                            |
| UP_SEQ_FEATURE   | short sequence motif:Selectivity filter    | 7              | 0.4%           | 0.282           | 1                                                                        | 1     | 99.909     | 8.70          |                                 |           |        |                            |
| GOTERM_MF_ALL    | GO:0005215~transporter activity            | 120            | 7.4%           | 0.294           | 1                                                                        | 0.997 | 99.796     | 3.82          |                                 |           |        |                            |

**Supplemental Table 5. Functional Mapping of WT1 Target Genes using DAVID.**

| Functional Group | Enrichment Score | Median <i>P</i> -Value | Geometric Mean | Category        | Term                                             | Count | % of Total | <i>P</i> -Value | Bonferroni | Benjamini | FDR    | Information Content (bits) |
|------------------|------------------|------------------------|----------------|-----------------|--------------------------------------------------|-------|------------|-----------------|------------|-----------|--------|----------------------------|
| 64               | 1.33             | 0.056                  | 0.046          | INTERPRO        | IPR003091:Voltage-dependent potassium channel    | 5     | 0.3%       | 0.315           | 1          | 1         | 99.934 | 9.09                       |
|                  |                  |                        |                | GOTERM_BP_ALL   | GO:0006813~potassium ion transport               | 17    | 1.1%       | 0.328           | 1          | 0.962     | 99.949 | 6.77                       |
|                  |                  |                        |                | SP_PIR_KEYWORDS | Potassium channel                                | 7     | 0.4%       | 0.377           | 1          | 0.944     | 99.935 | 7.26                       |
|                  |                  |                        |                | SP_PIR_KEYWORDS | potassium transport                              | 10    | 0.6%       | 0.401           | 1          | 0.953     | 99.964 | 7.51                       |
|                  |                  |                        |                | GOTERM_MF_ALL   | GO:0022857~transmembrane transporter activity    | 80    | 5.0%       | 0.405           | 1          | 1         | 100    | 4.35                       |
|                  |                  |                        |                | GOTERM_BP_ALL   | GO:0015672~monovalent inorganic cation transport | 25    | 1.6%       | 0.808           | 1          | 1         | 100    | 5.84                       |
