# Supplementary material for: Genomic characterization of Wilms' tumor suppressor 1 targets in nephron progenitor cells during kidney development
Source: Oxford University Press journal article supplement (doi:10.1242/dev.045732), 2010-03-09
Supplement: dev045732tables6.pdf [file dev045732tables6.pdf]

**Table S6. Densitometric measurement of ChIP-PCR enrichment**

| Gene          | Fold-enrichment on array | ChIP-PCR group    | Normalized amplicon density | Normalized density ratio (WT1 ChIP:Input) |
|---------------|--------------------------|-------------------|-----------------------------|-------------------------------------------|
| <i>HeyL</i>   | 25.1                     | WT1 ChIP<br>Input | 2296.35<br>199.82           | 11.49                                     |
| <i>Egr3</i>   | 24.4                     | WT1 ChIP<br>Input | 18014.45<br>156.93          | 114.79                                    |
| <i>Actn1</i>  | 23.8                     | WT1 ChIP<br>Input | 2685.29<br>181.1            | 14.83                                     |
| <i>Nab2</i>   | 19.6                     | WT1 ChIP<br>Input | 14795.4<br>618.88           | 23.91                                     |
| <i>Fyn</i>    | 18.7                     | WT1 ChIP<br>Input | 11488.66<br>1591.68         | 7.22                                      |
| <i>Zfr</i>    | 16.7                     | WT1 ChIP<br>Input | 1466.03<br>549.27           | 2.67                                      |
| <i>Hoxd4</i>  | 16.6                     | WT1 ChIP<br>Input | 1008.15<br>127.38           | 7.91                                      |
| <i>Sox11</i>  | 15.5                     | WT1 ChIP<br>Input | 2751.63<br>983.17           | 2.80                                      |
| <i>Scx</i>    | 14.7                     | WT1 ChIP<br>Input | 901.83<br>31.65             | 28.49                                     |
| <i>Sema6D</i> | 14.1                     | WT1 ChIP<br>Input | 2564.21<br>339.43           | 7.55                                      |
| <i>Bmp7</i>   | 12.9                     | WT1 ChIP<br>Input | 6621.97<br>605.59           | 10.93                                     |
| <i>Pbx2</i>   | 12.8                     | WT1 ChIP<br>Input | 10891.67<br>10208.41        | 1.07                                      |
| <i>Rest</i>   | 12.0                     | WT1 ChIP<br>Input | 2263.24<br>286.15           | 7.91                                      |
| <i>Zyx</i>    | 11.4                     | WT1 ChIP<br>Input | 873.16<br>345.94            | 2.52                                      |
| <i>Hhat</i>   | 11.4                     | WT1 ChIP<br>Input | 3356.92<br>1431.72          | 2.34                                      |
| <i>Arnt2</i>  | 10.9                     | WT1 ChIP<br>Input | 3395.57<br>77.35            | 43.90                                     |
| <i>Smad7</i>  | 10.7                     | WT1 ChIP<br>Input | 2870.59<br>281.77           | 10.19                                     |
| <i>ErbB2</i>  | 10.7                     | WT1 ChIP<br>Input | 754.17<br>130.34            | 5.79                                      |
| <i>Pbx1</i>   | 10.3                     | WT1 ChIP<br>Input | 44.11<br>310.45             | 0.14                                      |
| <i>Plxnb1</i> | 9.7                      | WT1 ChIP<br>Input | 1936.22<br>164.78           | 11.75                                     |
| <i>Sall1</i>  | 9.3                      | WT1 ChIP          | 14471.44                    | 5.38                                      |

|               |     |          |          |       |
|---------------|-----|----------|----------|-------|
|               |     | Input    | 2692.25  |       |
| <i>Pax2</i>   | 9.3 | WT1 ChIP | 1353.66  | 2.71  |
|               |     | Input    | 499.9    |       |
| <i>Bmp4</i>   | 8.8 | WT1 ChIP | 456.48   | 2.01  |
|               |     | Input    | 226.82   |       |
| <i>Smad4</i>  | 8.7 | WT1 ChIP | 3380.86  | 3.61  |
|               |     | Input    | 935.24   |       |
| <i>Smad3</i>  | 8.1 | WT1 ChIP | 1839.33  | 10.32 |
|               |     | Input    | 178.25   |       |
| <i>Vegfa</i>  | 8.0 | WT1 ChIP | 2085.11  | 3.17  |
|               |     | Input    | 658.4    |       |
| <i>Nab1</i>   | 7.6 | WT1 ChIP | 1780.31  | 0.95  |
|               |     | Input    | 1878.21  |       |
| <i>Ptch1</i>  | 6.9 | WT1 ChIP | 960.31   | 1.22  |
|               |     | Input    | 786.26   |       |
| <i>Slit3</i>  | 6.7 | WT1 ChIP | 2001.28  | 0.72  |
|               |     | Input    | 2772.54  |       |
| <i>Spry2</i>  | 6.6 | WT1 ChIP | 110.65   | 0.04  |
|               |     | Input    | 2752.32  |       |
| <i>Paxip1</i> | 6.2 | WT1 ChIP | 435.03   | 4.90  |
|               |     | Input    | 88.74    |       |
| <i>Lef1</i>   | 6.0 | WT1 ChIP | 206.99   | 0.61  |
|               |     | Input    | 337.36   |       |
| <i>Fgfr2</i>  | 5.9 | WT1 ChIP | 76.05    | 0.06  |
|               |     | Input    | 1242.78  |       |
| <i>Sulf2</i>  | 5.2 | WT1 ChIP | 1679.07  | 2.95  |
|               |     | Input    | 569.06   |       |
| <i>Bmper</i>  | 5.1 | WT1 ChIP | 9837.24  | 0.66  |
|               |     | Input    | 14870.88 |       |
| <i>Fgfr3</i>  | 4.9 | WT1 ChIP | 1385.57  | 1.60  |
|               |     | Input    | 868.63   |       |
| <i>Six4</i>   | 4.8 | WT1 ChIP | 358.4    | 0.54  |
|               |     | Input    | 662.27   |       |
| <i>Stau1</i>  | 4.5 | WT1 ChIP | 52.44    | 0.30  |
|               |     | Input    | 173.65   |       |
| <i>Smad6</i>  | 4.3 | WT1 ChIP | 297.31   | 22.47 |
|               |     | Input    | 13.23    |       |
| <i>Smo</i>    | 4.0 | WT1 ChIP | 562.07   | 7.63  |
|               |     | Input    | 73.63    |       |
| <i>Six2</i>   | 3.3 | WT1 ChIP | 1221.98  | 0.46  |
|               |     | Input    | 2660.44  |       |
